# Supplementary material for: Enantioselective one-pot synthesis of 4H-chromene derivatives catalyzed by a chiral Ni(ii) complex
Source: Royal Society of Chemistry journal article supplement (doi:10.1039/d0ra08906k), 2020-01-01
Supplement: d0ra08906k1.pdf [file d0ra08906k1.pdf]

*Supplementary Information*

**Enantioselective One-Pot Synthesis of 4H-Chromene  
Derivatives Catalyzed by A Chiral Ni(II) Complex**

**Xuan Yu, Wenjie Lan, Jiaqi Li, Hui Bai, Zhaohai Qin and Bin Fu\***

Department of Applied Chemistry, China Agricultural University, Beijing 100193, P. R. China

fubinchem@cau.edu.cn

## Table of Contents

|                                                                                                            |      |
|------------------------------------------------------------------------------------------------------------|------|
| 1. General information.....                                                                                | 2-1  |
| 2. General procedure for the synthesis of substrates.....                                                  | 2-1  |
| 2.1 Syntheses of <i>o</i> -quinone methides ( <i>o</i> -QMs).....                                          | 2-1  |
| 2.2 Synthesis procedure for ethyl 4-methoxyacetoacetate, ethyl 4-benzyloxyacetoacetate .....               | 2-2  |
| 2.3 Synthesis procedure for ethyl 4-( <i>tert</i> -butyldiphenylsilyl)oxyacetoacetate.....                 | 2-2  |
| 3. Optimization of the Reaction Conditions.....                                                            | 2-3  |
| 4. Enantioselective synthesis for 4H-chromenes.....                                                        | 2-4  |
| 4.1 The typical asymmetric catalytic procedure.....                                                        | 2-4  |
| 4.2 The reaction of vinyl <i>o</i> -quinone methide with $\beta$ -dicarbonyls.....                         | 2-10 |
| 4.3 Synthesis of (8-(4-methoxyphenyl)-8H-[1,3]dioxolo[4,5-g]chromen-7-yl)methanol (4).....                 | 2-14 |
| 4.4 Synthesis of 7-(azidomethyl)-8-(4-methoxyphenyl)-6-methyl-8H-[1,3]dioxolo[4,5-g]chromene (5).....      | 2-14 |
| 4.5 Synthesis of 9-(4-methoxyphenyl)-6,9-dihydro-8H-[1,3]dioxolo[4,5-g]furo[3,4-b]chromen-8-one (3ak)..... | 2-15 |
| 5. NMR Spectras.....                                                                                       | 2-16 |
| 6. HPLC Charts.....                                                                                        | 2-45 |
| 7. The structure of 3ab by X-ray diffraction analysis.....                                                 | 2-73 |
| 8. References.....                                                                                         | 2-74 |

## 1. General information.

The  $^1\text{H}$ ,  $^{13}\text{C}$  NMR spectra were recorded on a Bruker Avance DPX300 or Bruker Avance III 500 instrument with TMS as internal standard. Optical rotations were measured on an Insmark IP-digi300E8 polarimeter. The enantiomeric excesses of (*R*)- and (*S*)-enantiomer were determined by Agilent 1260 HPLC analysis over a chiral column (Daicel Chiralcel OD-H, AD-H, AS-H or OJ-H; eluted with hexane/iso-propanol; UV detector). Infrared Radiation were determined by NICOLET iS10. Solvents were purified and dried by standard procedures. The high-resolution mass spectra (HRMS) were measured on a Shimadzu LCMS-IT-TOF mass spectrometer or DIONEX UltiMate 3000 & Bruker Compact TOF mass spectrometer by ESI.

## 2. General procedure for the synthesis of substrates

### 2.1 Syntheses of *o*-quinone methides (*o*-QMs)

Most of *o*-QMs were synthesized according to Jurd's procedure.<sup>1</sup>

#### Synthetic procedure for vinyl *o*-quinone methide.

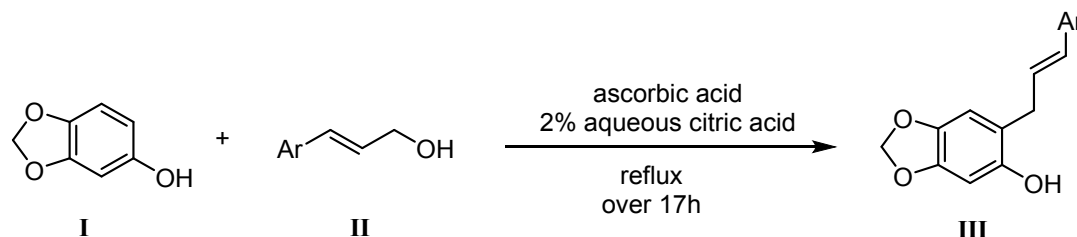

According to Jurd's method<sup>1</sup>: A suspension of sesame phenol **I** (2.76 g, 20.0 mmol) and (E)-3-argioprop-2-en-1-ol **II** (1 eq. 20 mmol) in 2% aqueous citric acid (100 mL) containing ascorbic acid (1.0 g, 5.6 mmol) was refluxed for 17 hours, then cooling to room temperature, the oily product was crystallized. After filtration, the crude product was recrystallized from toluene and afforded **III**, which was directly used in the next step

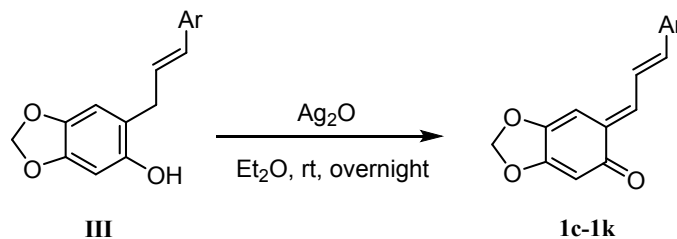

The solid **III** (1g) was dissolved in diethyl ether (50 mL), followed by addition of silver oxide (1.5 g), and stirred for 12h at room temperature (RT). The solution was filtered, the residue was washed with dichloromethane until the liquid flowing down became colorless. Then the solution was concentrated to 10 mL, and crystals were collected. The product is acid and heat sensitive.<sup>2</sup>

## 2.2 Synthesis procedure for ethyl 4-methoxyacetoacetate, ethyl 4-benzyloxyacetoacetate (2f, 2g).

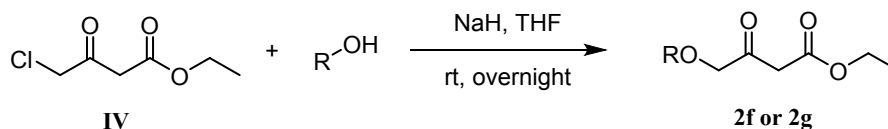

The methanol or benzyl alcohol (30mmol, 1.5eq) was added dropwise to a stirred suspension of 60% sodium hydride (60mmol, 3eq) in THF (20 mL) at 0°C. The mixture was stirred at RT for 2 h, then cooled to 0°C. Subsequently a solution of ethyl 4-chloroacetoacetate **IV** (20 mmol, 1.0 eq.) in THF (5mL) was added dropwise over 15 min. The mixture was stirred at 0°C for 30min and then warmed to room temperature for overnight. The reaction mixture was carefully quenched with 1N HCl solution at 0°C and extracted with EtOAc (20mL×3). The organic layers were washed with saturated aq. NaHCO<sub>3</sub> (20mL×2) and then saturated aq. NaCl (20mL), dried over anhydrous Na<sub>2</sub>SO<sub>4</sub>, filtered and concentrated in vacuo. The crude product was purified by silica gel chromatography to give ethyl 4-methoxyacetoacetate **2f** (colorless oil, 2.71g, 85% yield) (<sup>1</sup>H NMR (300 MHz, CDCl<sub>3</sub>) δ 4.15 (q, *J* = 7.1 Hz, 2H), 4.04 (s, 2H), 3.46 (s, 2H), 3.38 (s, 3H), 1.24 (t, *J* = 7.1 Hz, 3H)) or ethyl 4-benzyloxyacetoacetate **2g** (slight yellow oil, 4.25g, 90% yield) (<sup>1</sup>H NMR (300 MHz, CDCl<sub>3</sub>) δ 7.43-7.30 (m, 5H), 4.74 (s, 2H), 4.20 (q, *J* = 7.1 Hz, 2H), 4.17 (s, 2H), 3.56 (s, 2H), 1.28 (t, *J* = 7.1 Hz, 3H)).

## 2.3 Synthesis procedure for ethyl 4-(tert-butyldiphenylsilyl)oxyacetoacetate.

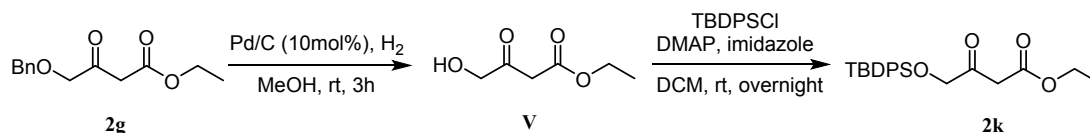

10% palladium on activated charcoal (0.21g) was added to a stirred solution of ethyl 4-(benzyloxy)-3-oxobutanoate **2g** (2g, 8 mmol) in anhydrous methanol (50mL) and the mixture was stirred under a hydrogen atmosphere for 3 h. The solution was filtered through a short pad of Celite®, the filtrate was concentrated in vacuo, and yielded the colorless oil and directly used in the next step.

Imidazole (12mmol, 1.5eq) and DMAP (5mol%) was added to a solution of **V** (8mmol, 1eq. in CH<sub>2</sub>Cl<sub>2</sub>(30mL), the mixture was stirred at 0°C for 15min, then a solution of TBDPSCl (8.8mmol, 1.1eq) in CH<sub>2</sub>Cl<sub>2</sub>(10mL) was added dropwise, then warmed to RT and stirred for 8h. The reaction mixture was washed in sequence with HCl(1N, 20 mL), saturated aq. NaHCO<sub>3</sub> (20 mL × 2) and then a solution of saturated aq. NaCl (20 mL), dried over anhydrous Na<sub>2</sub>SO<sub>4</sub>, filtered and concentrated in vacuo. The crude product was purified by silica gel chromatography (PE: EtOAc = 20:1) to give ethyl 4-(tert-butyldiphenylsilyl)oxyacetoacetate **2k**(2.3g, 75% yield). <sup>1</sup>H NMR (300 MHz, CDCl<sub>3</sub>) δ 7.76-7.64 (m, 4H), 7.51-7.39 (m, 6H), 4.29 (s, 2H), 4.23 (q, *J* = 7.2 Hz, 2H), 3.68 (s, 2H), 1.30 (t, *J* = 7.1 Hz, 3H), 1.15 (s, 9H). <sup>13</sup>C NMR (75 MHz, CDCl<sub>3</sub>) δ 203.07, 167.04, 135.40, 132.17, 130.02, 127.86, 69.40, 61.25, 45.69, 26.68, 19.09, 13.98.

### 3. Optimization of the Reaction Conditions<sup>a</sup>

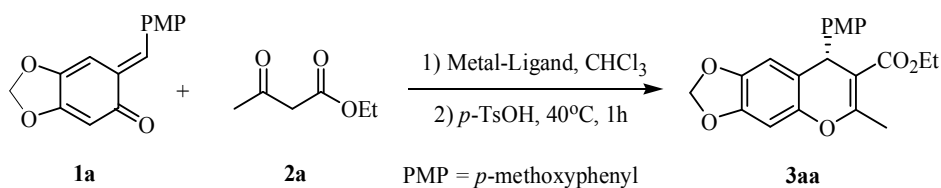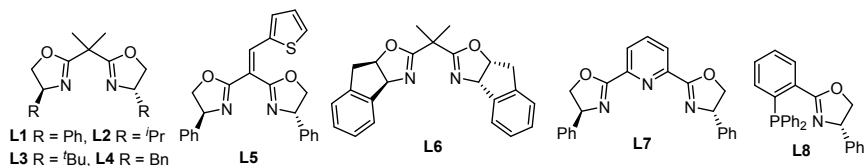

| entry           | metal                              | ligand    | solvent                         | T (°C) | time  | yield (%) <sup>b</sup> | ee (%) <sup>c</sup> |
|-----------------|------------------------------------|-----------|---------------------------------|--------|-------|------------------------|---------------------|
| 1               | Cu(OTf) <sub>2</sub>               | --        | CHCl <sub>3</sub>               | 25     | 30min | 51                     | --                  |
| 2               | Cu(OTf) <sub>2</sub>               | <b>L1</b> | CHCl <sub>3</sub>               | 0      | 5min  | 77                     | 30                  |
| 3               | Mg(OTf) <sub>2</sub>               | <b>L1</b> | CHCl <sub>3</sub>               | 0      | 5min  | 65                     | 6                   |
| 4               | Zn(OTf) <sub>2</sub>               | <b>L1</b> | CHCl <sub>3</sub>               | 0      | 5min  | 84                     | -36                 |
| 5               | Ni(OTf) <sub>2</sub>               | <b>L1</b> | CHCl <sub>3</sub>               | 0      | 5min  | 81                     | 90                  |
| 6               | Ni(ClO <sub>4</sub> ) <sub>2</sub> | <b>L1</b> | CHCl <sub>3</sub>               | 0      | 5min  | 54                     | 67                  |
| 7               | Ni(OTf) <sub>2</sub>               | <b>L1</b> | PhMe                            | 0      | 5min  | 56                     | 90                  |
| 8               | Ni(OTf) <sub>2</sub>               | <b>L1</b> | CH <sub>2</sub> Cl <sub>2</sub> | 0      | 5min  | 73                     | 69                  |
| 9               | Ni(OTf) <sub>2</sub>               | <b>L1</b> | THF                             | 0      | 5min  | trace                  | --                  |
| 10              | Ni(OTf) <sub>2</sub>               | <b>L1</b> | EtOAc                           | 0      | 5min  | 46                     | 88                  |
| 11              | Ni(OTf) <sub>2</sub>               | <b>L2</b> | CHCl <sub>3</sub>               | 0      | 5min  | 67                     | 60                  |
| 12              | Ni(OTf) <sub>2</sub>               | <b>L3</b> | CHCl <sub>3</sub>               | 0      | 5min  | 79                     | 20                  |
| 13              | Ni(OTf) <sub>2</sub>               | <b>L4</b> | CHCl <sub>3</sub>               | 0      | 5min  | 66                     | 55                  |
| 14              | Ni(OTf) <sub>2</sub>               | <b>L5</b> | CHCl <sub>3</sub>               | 0      | 5min  | 88                     | 52                  |
| 15              | Ni(OTf) <sub>2</sub>               | <b>L6</b> | CHCl <sub>3</sub>               | 0      | 5min  | 75                     | 26                  |
| 16              | Ni(OTf) <sub>2</sub>               | <b>L7</b> | CHCl <sub>3</sub>               | 25     | 8h    | trace                  | --                  |
| 17              | Ni(OTf) <sub>2</sub>               | <b>L8</b> | CHCl <sub>3</sub>               | 0      | 5min  | 75                     | -22                 |
| 18              | Ni(OTf) <sub>2</sub>               | <b>L1</b> | CHCl <sub>3</sub>               | 25     | 5min  | 69                     | 65                  |
| 19              | Ni(OTf) <sub>2</sub>               | <b>L1</b> | CHCl <sub>3</sub>               | -20    | 1h    | 87                     | 92                  |
| 20              | Ni(OTf) <sub>2</sub>               | <b>L1</b> | CHCl <sub>3</sub>               | -40    | 3h    | 90                     | 95                  |
| 21 <sup>d</sup> | Ni(OTf) <sub>2</sub>               | <b>L1</b> | CHCl <sub>3</sub>               | -40    | 5h    | 78                     | 95                  |
| 22 <sup>e</sup> | Ni(OTf) <sub>2</sub>               | <b>L1</b> | CHCl <sub>3</sub>               | -40    | 12h   | 68                     | 91                  |

<sup>a</sup> Unless indicated otherwise, reactions of **1a** (0.15 mmol) and **2a** (0.1 mmol), were carried out under nitrogen in the presence of metal salt (0.01 mmol), chiral ligand (0.011 mmol) in solvent (1.5 mL); <sup>b</sup> Isolated yield; <sup>c</sup> Determined by chiral HPLC analysis; <sup>d</sup> 5 mol% catalyst; <sup>e</sup> 2.5 mol% catalyst.

## 4. The synthesis of 4*H*-chromenes

### 4.1 The typical asymmetric catalytic procedure

In a nitrogen-filled flask, a solution of ligand **L1** (3.67mg, 0.011mmol) and Ni(OTf)<sub>2</sub> (3.57mg, 0.01mmol) in CHCl<sub>3</sub> (1mL) was stirred at room temperature for 30min, then β-dicarbonyls (0.1mmol, 1.0eq) was added and stirred for another 30 min. The mixture was cooled to -40°C, and a solution of *o*-QMs (0.15mmol, 1.5eq, in 0.5mL of CHCl<sub>3</sub>) was added by syringe and stirred at -40°C. After completion (TLC monitoring), the solution was heated to 40°C and then *p*-TsOH (3.5mg, 0.02mmol, 0.20 equiv) was added, and stirred for 1 h, the solution was concentrated and purified by silica gel chromatography.

#### Ethyl (S)-8-(4-methoxyphenyl)-6-methyl-8*H*-[1,3]dioxolo[4,5-*g*]chromene-7-carboxylate (**3aa**).

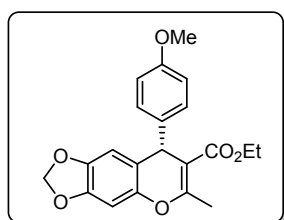

The title compound was purified by silica gel chromatography (PE: EtOAc = 30: 1) to afford the product, slight yellow oil, 90% yield.  $[\alpha]_D^{20} = -50.7$  (c = 0.41, CH<sub>2</sub>Cl<sub>2</sub>); 95% ee, determined by HPLC analysis [Daicel Chiralcel OD-H column, *n*-hexane/*i*-PrOH = 95 : 5, 0.5 mL/min, 254 nm; t (major) = 13.17 min, t (minor) = 12.40 min];

<sup>1</sup>H NMR (300 MHz, CDCl<sub>3</sub>) δ 7.18 – 7.06 (m, 2H), 6.84 – 6.72 (m, 2H), 6.52 (s, 1H), 6.42 (s, 1H), 5.86 (dd, *J* = 16.7, 1.4 Hz, 2H), 4.84 (s, 1H), 4.08 (qq, *J* = 7.1, 3.7 Hz, 2H), 3.74 (s, 3H), 2.44 (s, 3H), 1.18 (t, *J* = 7.1 Hz, 3H). <sup>13</sup>C NMR (75 MHz, CDCl<sub>3</sub>) δ 166.94, 159.26, 157.81, 146.28, 143.94, 143.53, 138.85, 128.37, 116.83, 113.41, 107.12, 105.30, 100.94, 97.55, 59.74, 54.84, 40.54, 19.07, 13.81. IR (film): ν = 3360, 2922, 2851, 1708, 1608, 1507, 1479, 1369, 1250, 1150, 1066, 1035, 936, 845, 705, 656, 554, 457 cm<sup>-1</sup>; HRMS (ESI): *m/z*: calcd. for C<sub>21</sub>H<sub>20</sub>O<sub>6</sub><sup>+</sup> [M-H]<sup>+</sup>: 367.1176; found: 367.1176.

#### Isopropyl (S)-8-(4-methoxyphenyl)-6-methyl-8*H*-[1,3]dioxolo[4,5-*g*]chromene-7-carboxylate (**3ab**).

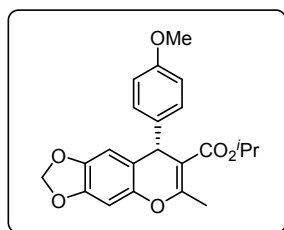

The title compound was purified by silica gel chromatography (PE: EtOAc = 30: 1) to afford the product, colorless oil, 84% yield.  $[\alpha]_D^{20} = -10.1$  (c = 1.43, CH<sub>2</sub>Cl<sub>2</sub>); 91% ee, determined by HPLC analysis [Daicel Chiralcel AS-H column, *n*-hexane/*i*-PrOH = 95: 5, 0.5 mL/min, 254 nm; t (major) = 12.00 min, t (minor) = 11.00 min]; <sup>1</sup>H NMR (300 MHz, CDCl<sub>3</sub>) δ 7.17 – 7.06 (m, 2H), 6.84 – 6.70 (m, 2H),

6.51 (s, 1H), 6.42 (s, 1H), 5.85 (dd, *J* = 17.5, 1.4 Hz, 2H), 4.95 (m, 1H), 4.83 (s, 1H), 3.74 (s, 3H), 2.43 (s, 3H), 1.22 (d, *J* = 6.2 Hz, 3H), 1.04 (d, *J* = 6.2 Hz, 3H). <sup>13</sup>C NMR (75 MHz, CDCl<sub>3</sub>) δ 166.71, 159.22, 158.11, 146.56, 144.19, 143.77, 139.22, 128.74, 117.07, 113.66, 107.46, 105.76, 101.22, 97.82, 67.38, 55.15, 40.85, 21.99, 21.59, 19.29. IR (film): ν = 2953, 2921, 2852, 2360, 1712, 1508, 1480, 1457, 1377, 1231, 1199, 1151, 1061, 1040 cm<sup>-1</sup>; HRMS (ESI): *m/z*: calcd. for

$C_{22}H_{22}O_6^+$  [M-H]<sup>+</sup>: 381.1333; found: 381.1332.

**Benzyl (S)-8-(4-methoxyphenyl)-6-methyl-8H-[1,3]dioxolo[4,5-g]chromene-7-carboxylate (3ac).**

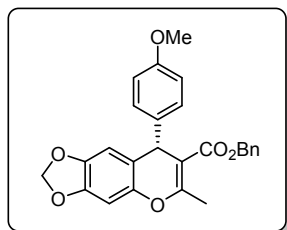

The title compound was purified by silica gel chromatography (PE: EtOAc = 30: 1) to afford the product, colorless oil, 85% yield.  $[\alpha]_D^{25} = -43.1$  (c = 1.08, CH<sub>2</sub>Cl<sub>2</sub>); 90% ee, determined by HPLC analysis [Daicel Chiralcel OD-H column, *n*-hexane/*i*-PrOH = 90: 10, 1.0 mL/min, 254 nm; t (major) = 20.09 min, t (minor) = 18.97 min]; <sup>1</sup>H NMR (300 MHz, CDCl<sub>3</sub>) δ 7.31-7.27 (m, 3H), 7.17-7.14 (m, 2H), 7.09 – 7.02 (m, 2H), 6.77 – 6.69 (m, 2H), 6.51 (s, 1H), 6.40 (s, 1H), 5.83 (dd, *J* = 17.3, 1.3 Hz, 2H), 5.06 (q, *J* = 10.3 Hz, 2H), 4.85 (s, 1H), 3.74 (s, 3H), 2.45 (s, 3H). <sup>13</sup>C NMR (75 MHz, CDCl<sub>3</sub>) δ 167.02, 160.25, 158.14, 146.60, 144.29, 143.67, 139.03, 136.08, 128.66, 128.34, 128.05, 127.90, 117.06, 113.77, 107.38, 105.21, 101.25, 97.86, 65.99, 55.15, 40.77, 19.51. IR (film): ν = 2920, 2359, 1706, 1651, 1608, 1507, 1477, 1378, 1321, 1231, 1192, 1147, 1033, 935, 843, 785, 697, 593, 545, 490 cm<sup>-1</sup>; HRMS (ESI): m/z: calcd. for C<sub>26</sub>H<sub>22</sub>O<sub>6</sub><sup>+</sup> [M+H]<sup>+</sup>: 431.1489; found: 431.1491.

**Ethyl (S)-8-(4-methoxyphenyl)-6-propyl-8H-[1,3]dioxolo[4,5-g]chromene-7-carboxylate (3ad).**

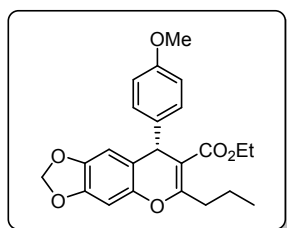

The title compound was purified by silica gel chromatography (PE: EtOAc = 30: 1) to afford the product: slightly yellow oil, 78% yield.  $[\alpha]_D^{25} = -45.2$  (c = 1.36, CH<sub>2</sub>Cl<sub>2</sub>); 93% ee, determined by HPLC analysis [Daicel Chiralcel OD-H column, *n*-hexane/*i*-PrOH = 90: 10, 1.0 mL/min, 254 nm; t (major) = 11.70 min, t (minor) = 10.68 min]; <sup>1</sup>H NMR (300 MHz, CDCl<sub>3</sub>) δ 7.18 – 7.06 (m, 2H), 6.84 – 6.73 (m, 2H), 6.53 (s, 1H), 6.43 (s, 1H), 5.88 (d, *J* = 1.4 Hz, 1H), 5.83 (d, *J* = 1.4 Hz, 1H), 4.85 (s, 1H), 4.08 (qd, *J* = 7.1, 3.0 Hz, 2H), 3.74 (s, 3H), 2.94 – 2.71 (m, 2H), 1.78-1.65 (m, 2H), 1.19 (t, *J* = 7.1 Hz, 3H), 1.00 (t, *J* = 7.4 Hz, 3H). <sup>13</sup>C NMR (75 MHz, CDCl<sub>3</sub>) δ 167.07, 163.14, 158.13, 146.60, 144.21, 143.97, 139.18, 128.62, 117.23, 113.76, 107.41, 105.62, 101.23, 97.86, 60.05, 55.15, 41.01, 34.16, 21.01, 14.10, 13.88. IR (film): ν = 3054, 2962, 2930, 1706, 1651, 1610, 1508, 1479, 1328, 1264, 1191, 1069, 1035, 939, 845, 735, 562 cm<sup>-1</sup>; HRMS (ESI): m/z: calcd. for C<sub>28</sub>H<sub>24</sub>O<sub>6</sub><sup>+</sup> [M-H]<sup>+</sup>: 395.1489; found: 395.1488.

**Ethyl (S)-6-isopropyl-8-(4-methoxyphenyl)-8H-[1,3]dioxolo[4,5-g]chromene-7-carboxylate (3ae).**

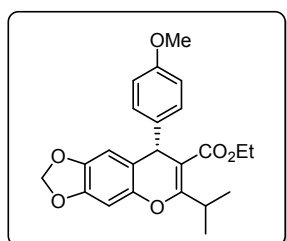

The title compound was purified by silica gel chromatography (PE: EtOAc = 30: 1) to afford the product, colorless oil, 65% yield.  $[\alpha]_D^{25} = -72.0$  (c = 0.40, CH<sub>2</sub>Cl<sub>2</sub>); 92% ee, determined by HPLC analysis [Daicel Chiralcel AS-H column, *n*-hexane/*i*-PrOH = 90:10, 1.0

mL/min, 254 nm; t (major) = 4.79 min, t (minor) = 4.25 min];  $^1\text{H}$  NMR (300 MHz,  $\text{CDCl}_3$ )  $\delta$  7.18 – 7.06 (m, 2H), 6.84 – 6.72 (m, 2H), 6.55 (s, 1H), 6.44 (s, 1H), 5.86 (dd,  $J = 15.1, 1.4$  Hz, 2H), 4.83 (s, 1H), 4.07 (q,  $J = 6.9$  Hz, 2H), 3.98–3.89 (m, 1H), 3.74 (s, 3H), 1.28 (t,  $J = 6.9$  Hz, 3H), 1.18 (dt,  $J = 7.1, 3.7$  Hz, 6H).  $^{13}\text{C}$  NMR (75 MHz,  $\text{CDCl}_3$ )  $\delta$  167.15, 166.40, 158.15, 146.62, 144.18, 144.06, 139.17, 128.51, 117.27, 113.80, 107.32, 104.20, 101.23, 97.80, 60.06, 55.16, 41.15, 29.58, 19.90, 19.40, 14.08. IR (film):  $\nu = 2964, 2929, 1706, 1650, 1611, 1507, 1479, 1440, 1320, 1247, 1150, 1081, 1034, 938, 843, 786, 583$   $\text{cm}^{-1}$ ; HRMS (ESI): m/z: calcd. for  $\text{C}_{28}\text{H}_{24}\text{O}_6^+$   $[\text{M}-\text{H}]^+$ : 396.1489; found: 395.1487.

**Ethyl (S)-6-(methoxymethyl)-8-(4-methoxyphenyl)-8H-[1,3]dioxolo[4,5-g]chromene-7-carboxylate (3af).**

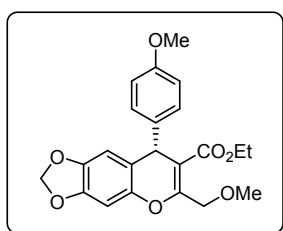

The title compound was purified by silica gel chromatography (PE: EtOAc = 10: 1) to afford the product: slight yellow oil, 62% yield.  $[\alpha]_D^{25} = -55.37$  (c = 0.91,  $\text{CH}_2\text{Cl}_2$ ); 86% ee, determined by HPLC analysis [Daicel Chiralcel OD-H column, *n*-hexane/*i*-PrOH = 90: 10, 0.8 mL/min, 254 nm; t (major) = 11.05 min, t (minor) = 9.34 min];  $^1\text{H}$  NMR (300 MHz,  $\text{CDCl}_3$ )  $\delta$  7.16 – 7.09 (m, 2H), 6.83 – 6.73 (m, 2H),

6.62 (s, 1H), 6.41 (s, 1H), 5.87 (dd,  $J = 15.5, 1.2$  Hz, 1H), 4.89 (s, 1H), 4.62 (dd,  $J = 17.6$  Hz, 12.6 Hz, 2H), 4.14–4.06 (m, 2H), 3.74 (s, 3H), 3.46 (s, 3H), 1.19 (t,  $J = 7.1$  Hz, 3H).  $^{13}\text{C}$  NMR (126 MHz,  $\text{CDCl}_3$ )  $\delta$  166.44, 158.32, 157.03, 146.77, 144.52, 143.77, 138.40, 128.80, 116.59, 113.86, 108.77, 107.36, 101.34, 98.18, 69.27, 60.50, 58.71, 55.17, 41.05, 14.06. IR (film):  $\nu = 2929, 2360, 1706, 1654, 1609, 1508, 1479, 1440, 1324, 1245, 1192, 1148, 1095, 1060, 1035, 936, 846, 790, 565$   $\text{cm}^{-1}$ ; HRMS (ESI): m/z: calcd. for  $\text{C}_{22}\text{H}_{23}\text{O}_7^+$   $[\text{M}+\text{H}]^+$ : 399.1438; found: 399.1436.

**Ethyl (S)-6-((benzyloxy)methyl)-8-(4-methoxyphenyl)-8H-[1,3]dioxolo[4,5-g]chromene-7-carboxylate (3ag).**

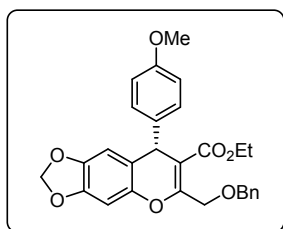

The title compound was purified by silica gel chromatography (PE: EtOAc = 10: 1) to afford the product: slight yellow oil, 63% yield.  $[\alpha]_D^{25} = -67.2$  (c = 0.96,  $\text{CH}_2\text{Cl}_2$ ); 91% ee, determined by HPLC analysis [Daicel Chiralcel OD-H column, *n*-hexane/*i*-PrOH = 90:10, 0.8 mL/min, 254 nm; t (major) = 12.37 min, t (minor) = 11.19 min];

$^1\text{H}$  NMR (300 MHz,  $\text{CDCl}_3$ )  $\delta$  7.40 – 7.28 (m, 5H), 7.16 – 7.08 (m, 2H), 6.84 – 6.73 (m, 2H), 6.61 (s, 1H), 6.41 (s, 1H), 5.86 (dd,  $J = 16.2, 1.4$  Hz, 2H), 4.89 (s, 1H), 4.73 (dd,  $J = 44.7, 12.9$  Hz), 4.63 (s, 2H), 4.06 (qd,  $J = 7.1, 1.4$  Hz, 2H), 3.74 (s, 3H), 1.15 (t,  $J = 7.1$  Hz, 3H).  $^{13}\text{C}$  NMR (126 MHz,  $\text{CDCl}_3$ )  $\delta$  166.42, 158.30, 157.15, 146.76, 144.49, 143.80, 138.37, 138.08, 128.79, 128.31, 127.85, 127.82, 127.65, 125.75, 116.60, 113.85, 108.77, 107.36, 101.32, 98.15, 72.85, 67.08, 60.47, 55.15, 41.08, 14.02. IR (film):  $\nu = 2922, 2359, 1704, 1653, 1609, 1507, 1478, 1439, 1367, 1324, 1243, 1192, 1148, 1060, 1034, 936, 846, 789, 698, 586$   $\text{cm}^{-1}$ ; HRMS (ESI): m/z: calcd. for  $\text{C}_{28}\text{H}_{27}\text{O}_7^+$   $[\text{M}+\text{H}]^+$ : 475.1751; found: 475.1751.



**Ethyl (S)-8-(4-methoxyphenyl)-6-styryl-8H-[1,3]dioxolo[4,5-g]chromene-7-carboxylate (3ah).**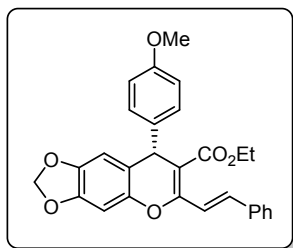

The title compound was purified by silica gel chromatography (PE: EtOAc = 30: 1) to afford the product: slightly yellow solid, 95% yield. Mp. 90-94°C,  $[\alpha]_D^{30} = 0.049$  (c = 0.38, CH<sub>2</sub>Cl<sub>2</sub>); 85% ee, determined by HPLC analysis [Daicel Chiralcel OD-H column, *n*-hexane/*i*-PrOH = 90 : 10, 1.0 mL/min, 254 nm; t (major) = 10.69 min, t (minor) = 21.11 min]; <sup>1</sup>H NMR (300 MHz, CDCl<sub>3</sub>) δ 8.07 (d, *J* = 16.0 Hz, 1H), 7.62 – 7.55 (m, 2H), 7.48 (d, *J* = 16.0 Hz, 1H), 7.43 – 7.28 (m, 3H), 7.19–7.12 (m, 2H), 6.82 – 6.74 (m, 2H), 6.70 (s, 1H), 6.49 (s, 1H), 5.89 (dd, *J* = 15.6, 1.4 Hz, 2H), 4.97 (s, 1H), 4.16 (q, *J* = 7.1 Hz, 2H), 3.74 (s, 3H), 1.27 (t, 3H). <sup>13</sup>C NMR (75 MHz, CDCl<sub>3</sub>) δ 166.46, 157.97, 155.24, 146.51, 144.04, 143.56, 138.39, 136.12, 134.56, 128.49, 127.20, 119.83, 116.97, 113.56, 107.03, 101.04, 97.72, 60.15, 54.86, 41.23, 13.89. IR (film):  $\tilde{\nu} = 3025, 2922, 2851, 1697, 1584, 1508, 1479, 1441, 1341, 1239, 1195, 1150, 1075, 1036, 971, 939, 844, 792, 559$  cm<sup>-1</sup>; HRMS (ESI): m/z: calcd. for C<sub>28</sub>H<sub>24</sub>O<sub>6</sub><sup>+</sup> [M]<sup>+</sup>: 455.1489; found: 455.1490.

**Ethyl (S)-8-(4-methoxyphenyl)-6-phenyl-8H-[1,3]dioxolo[4,5-g]chromene-7-carboxylate (3ai).**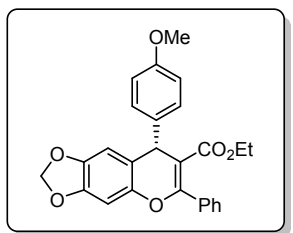

The title compound was purified by silica gel chromatography (PE: EtOAc = 30: 1) to afford the product: white solid, 60% yield. Mp. 60-62°C,  $[\alpha]_D^{25} = -8.8$  (c = 0.79, CH<sub>2</sub>Cl<sub>2</sub>); 70% ee, determined by HPLC analysis [Daicel Chiralcel OD-H column, *n*-hexane/*i*-PrOH = 95: 5, 0.5 mL/min, 254 nm; t (major) = 20.22 min, t (minor) = 19.21 min]; <sup>1</sup>H NMR (300 MHz, CDCl<sub>3</sub>) δ 7.50 – 7.39 (m, 5H), 7.27 – 7.22 (m, 3H), 6.85 – 6.78 (m, 2H), 6.60 (s, 1H), 6.49 (s, 1H), 5.89 (dd, *J* = 15.4, 1.4 Hz, 2H), 4.97 (s, 1H), 3.86 (q, *J* = 7.1 Hz, 2H), 3.76 (s, 3H), 0.84 (t, *J* = 7.1 Hz, 3H). <sup>13</sup>C NMR (75 MHz, CDCl<sub>3</sub>) δ 167.18, 158.34, 158.05, 146.79, 144.52, 144.47, 138.50, 135.25, 129.42, 128.79, 128.71, 127.82, 116.97, 113.96, 107.47, 107.07, 101.35, 98.16, 60.13, 55.19, 41.73, 13.51. IR (film):  $\nu = 2919, 2849, 1695, 1608, 1508, 1478, 1442, 1369, 1338, 1243, 1161, 1076, 1034, 936, 843, 787, 698, 550$  cm<sup>-1</sup>; HRMS (ESI): m/z: calcd. for C<sub>26</sub>H<sub>23</sub>O<sub>6</sub><sup>+</sup> [M+H]<sup>+</sup>: 431.1489; found: 431.1491.

**Ethyl (S)-8-(4-methoxyphenyl)-6-(thiophen-2-yl)-8H-[1,3]dioxolo[4,5-g]chromene-7-carboxylate (3aj).**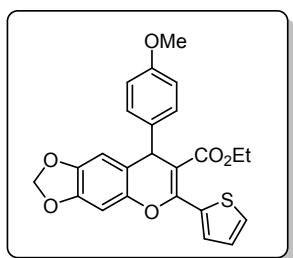

The title compound was purified by silica gel chromatography (PE: EtOAc = 30: 1) to afford the product, slightly yellow oil, 90% yield.,  $[\alpha]_D^{30} = 0.023$  (c = 0.6, CH<sub>2</sub>Cl<sub>2</sub>); 37% ee, determined by HPLC analysis [Daicel Chiralcel OD-H column, *n*-hexane/*i*-PrOH = 90 : 10, 0.8 mL/min, 254 nm; t (major) = 12.92 min, t (minor) = 10.85 min]; <sup>1</sup>H NMR (300 MHz, CDCl<sub>3</sub>) δ 7.45 (d, *J* = 4.3 Hz), 7.24 – 7.15 (m), 7.10 – 7.00 (m), 6.87 – 6.76 (m), 6.63, 6.50 – 6.42 (m), 5.89 (dd, *J* = 13.8, 1.4 Hz), 4.95, 4.00 (q, *J* =

7.1 Hz), 3.76, 1.03 (t,  $J = 7.1$  Hz)..  $^{13}\text{C}$  NMR (75 MHz,  $\text{CDCl}_3$ )  $\delta$  167.12, 158.46, 150.52, 146.88, 144.57, 137.84, 135.45, 129.96, 128.87, 128.04, 126.60, 116.91, 114.00, 107.55, 107.31, 101.39, 60.48, 55.21, 42.26, 13.76. IR (film):  $\nu = 3104, 2978, 2902, 1708, 1666, 1609, 1508, 1479, 1368, 1224, 1192, 1152, 1072, 1035, 936, 854, 795, 557\text{ cm}^{-1}$ ; HRMS (ESI):  $m/z$ : calcd. for  $\text{C}_{24}\text{H}_{21}\text{O}_6^+$   $[\text{M}+\text{H}]^+$ : 437.1503; found: 437.1504.

**(S)-1-(8-(4-methoxyphenyl)-6-methyl-8H-[1,3]dioxolo[4,5-g]chromen-7-yl)ethan-1-one (3ak).**

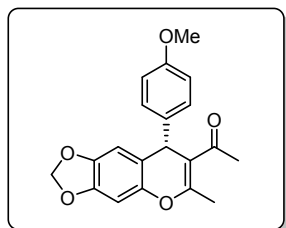

The title compound was purified by silica gel chromatography (PE: EtOAc = 10: 1) to afford the product, slight yellow oil, 90% yield.  $[\alpha]_D^{25} = -59.7$  ( $c = 1.43$ ,  $\text{CH}_2\text{Cl}_2$ ); 89% ee, determined by HPLC analysis [Daicel Chiralcel AS-H column,  $n$ -hexane/ $i$ -PrOH = 90: 10, 1.0 mL/min, 254 nm;  $t$  (major) = 26.25 min,  $t$  (minor) = 15.19 min];  $^1\text{H}$  NMR (300 MHz,  $\text{CDCl}_3$ )  $\delta$  7.19 – 7.08 (m, 2H), 6.86 – 6.77 (m, 2H), 6.51 (s, 1H), 6.49 (s, 1H), 5.86 (dd,  $J = 18.7, 1.4$  Hz, 2H), 4.84 (s, 1H), 3.75 (s, 3H), 2.41 (s, 3H), 2.15 (s, 3H).  $^{13}\text{C}$  NMR (75 MHz,  $\text{CDCl}_3$ )  $\delta$  199.04, 158.61, 158.45, 146.72, 144.29, 143.52, 138.31, 128.46, 117.23, 114.23, 113.73, 107.21, 101.31, 97.97, 55.20, 41.63, 30.04, 19.94. IR (film):  $\nu = 2902, 2359, 1681, 1644, 1606, 1582, 1506, 1476, 1428, 1377, 1322, 1230, 1197, 1149, 1031, 930, 82, 794, 609, 554, 450\text{ cm}^{-1}$ ; HRMS (ESI):  $m/z$ : calcd. for  $\text{C}_{20}\text{H}_{19}\text{O}_5^+$   $[\text{M}+\text{H}]^+$ : 339.1227; found: 339.1227.

**(S)-1-(6-isopropyl-8-(4-methoxyphenyl)-8H-[1,3]dioxolo[4,5-g]chromen-7-yl)-2-methylpropan-1-one (3al).**

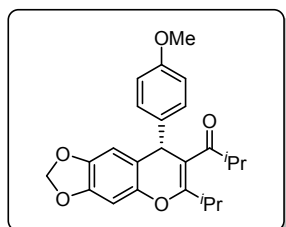

The title compound was purified by silica gel chromatography (PE: EtOAc = 10: 1) to afford the product, slight yellow oil, 80% yield.  $[\alpha]_D^{25} = -48.3$  ( $c = 0.60$ ,  $\text{CH}_2\text{Cl}_2$ ); 93% ee, determined by HPLC analysis [Daicel Chiralcel AD-H column,  $n$ -hexane/ $i$ -PrOH = 90: 10, 0.8 mL/min, 254 nm;  $t$  (major) = 12.76 min,  $t$  (minor) = 6.27 min];  $^1\text{H}$  NMR (300 MHz,  $\text{CDCl}_3$ )  $\delta$  7.15 – 7.06 (m, 2H), 6.86 – 6.74 (m, 2H), 6.52 (s, 1H), 6.42 (s, 1H), 5.85 (dd,  $J = 15.1, 1.4$  Hz, 2H), 4.81 (s, 1H), 3.75 (s, 3H), 3.26-3.17 (m, 1H), 2.93-2.84 (m, 1H), 1.31 (d,  $J = 6.8$  Hz, 3H), 1.16 (d,  $J = 6.8$  Hz, 3H), 0.97 (d,  $J = 7.0$  Hz, 3H), 0.79 (d,  $J = 6.6$  Hz, 3H).  $^{13}\text{C}$  NMR (126 MHz,  $\text{CDCl}_3$ )  $\delta$  207.79, 161.67, 158.46, 146.73, 144.13, 143.95, 137.88, 128.76, 116.74, 114.21, 111.97, 107.26, 101.24, 97.85, 55.19, 41.86, 37.69, 30.03, 20.32, 19.71, 19.24, 17.69. IR (film):  $\nu = 2965, 2929, 2360, 1683, 1608, 1507, 1478, 1438, 1303, 1235, 1141, 1034, 934, 870, 835, 795, 559\text{ cm}^{-1}$ ; HRMS (ESI):  $m/z$ : calcd. for  $\text{C}_{24}\text{H}_{27}\text{O}_5^+$   $[\text{M}+\text{H}]^+$ : 395.1853; found: 395.1857.

**Ethyl (S)-6,7-dimethoxy-4-(4-methoxyphenyl)-2-methyl-4H-chromene-3-carboxylate (3ba).**

The title compound was purified by silica gel chromatography (PE: EtOAc = 10: 1) to afford the product, slight yellow oil, 87% yield.  $[\alpha]_D^{25} = -16.8$  ( $c = 1.16$ ,  $\text{CH}_2\text{Cl}_2$ ); 84% ee, determined by

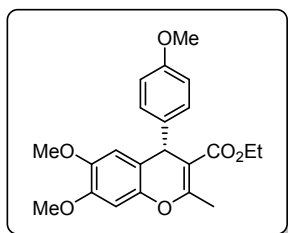

HPLC analysis [Daicel Chiralcel OD-H column, *n*-hexane/*i*-PrOH = 90: 10, 0.8 mL/min, 254 nm; *t* (major) = 9.19 min, *t* (minor) = 10.42 min];  $^1\text{H}$  NMR (300 MHz,  $\text{CDCl}_3$ )  $\delta$  7.18–7.07 (m, 2H), 6.82–6.73 (m, 2H), 6.58 (s, 1H), 6.44 (s, 1H), 4.90 (s, 1H), 4.09 (qd,  $J = 7.1$ , 2.5 Hz, 2H), 3.85 (s, 3H), 3.75 (s, 3H), 3.74 (s, 3H), 2.45 (s, 3H), 1.20 (t,  $J = 7.1$  Hz, 3H).  $^{13}\text{C}$  NMR (75 MHz,  $\text{CDCl}_3$ )  $\delta$  167.36, 159.53, 158.06, 148.32, 146.06, 143.19, 139.16, 128.75, 115.87, 113.70, 110.79, 105.94, 100.07, 60.03, 56.17, 55.99, 55.15, 40.49, 19.47, 14.15. IR (film):  $\nu = 2932, 2834, 1707, 1643, 1600, 1508, 1463, 1379, 1322, 1254, 1225, 1211, 1172, 1121, 1068, 1034, 970, 844, 767, 606, 554\text{ cm}^{-1}$ ; HRMS (ESI): *m/z*: calcd. for  $\text{C}_{22}\text{H}_{24}\text{O}_6^+$  [M-H] $^+$ : 383.1489; found: 383.1488.

**(S)-1-(6,7-dimethoxy-4-(4-methoxyphenyl)-2-methyl-4H-chromen-3-yl)ethan-1-one (3bi).**

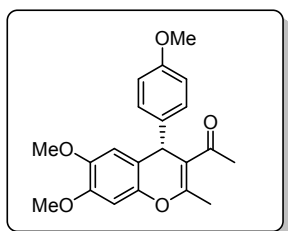

The title compound was purified by silica gel chromatography (PE: EtOAc = 10: 1) to afford the product: slight yellow oil, 79% yield.  $[\alpha]_D^{25} = -22.5$  ( $c = 0.80$ ,  $\text{CH}_2\text{Cl}_2$ ); 63% ee, determined by HPLC analysis [Daicel Chiralcel OD-H column, *n*-hexane/*i*-PrOH = 90: 10, 1.0 mL/min, 254 nm; *t* (major) = 12.16 min, *t* (minor) = 12.32 min];  $^1\text{H}$  NMR (300 MHz,  $\text{CDCl}_3$ )  $\delta$  7.19–7.11 (m, 2H), 6.85–6.73 (m, 2H), 6.56 (s, 1H), 6.50 (s, 1H), 4.90 (s, 1H), 3.83 (s, 3H), 3.75 (s, 3H), 3.75 (s, 3H), 2.41 (s, 3H), 2.16 (s, 3H).  $^{13}\text{C}$  NMR (126 MHz,  $\text{CDCl}_3$ )  $\delta$  199.20, 158.45, 158.38, 148.46, 146.04, 142.80, 138.33, 128.51, 115.89, 114.20, 114.03, 110.66, 100.18, 77.25, 77.00, 76.75, 56.23, 56.00, 55.19, 41.27, 30.05, 20.00. IR (film):  $\nu = 2999, 2930, 2835, 1680, 1629, 1582, 1507, 1441, 1378, 1356, 1322, 1252, 1211, 1173, 1121, 1033, 936, 871, 842, 762, 651, 599, 557\text{ cm}^{-1}$ ; HRMS (ESI): *m/z*: calcd. for  $\text{C}_{21}\text{H}_{23}\text{O}_5^+$  [M+H] $^+$ : 355.1540; found: 355.1539.

**(S)-1-(2-isopropyl-6,7-dimethoxy-4-(4-methoxyphenyl)-4H-chromen-3-yl)-2-methylpropan-1-one (3bj).**

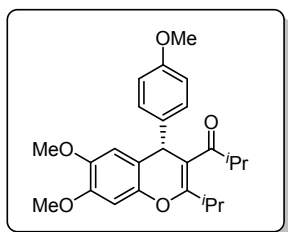

The title compound was purified by silica gel chromatography (PE: EtOAc = 10: 1) to afford the product, slight yellow oil, 55% yield.  $[\alpha]_D^{25} = -32.1$  ( $c = 1.27$ ,  $\text{CH}_2\text{Cl}_2$ ); 74% ee, determined by HPLC analysis [Daicel Chiralcel AD-H column, *n*-hexane/*i*-PrOH = 90: 10, 0.8 mL/min, 254 nm; *t* (major) = 6.96 min, *t* (minor) = 8.08 min];  $^1\text{H}$  NMR (300 MHz,  $\text{CDCl}_3$ )  $\delta$  7.18–7.04 (m, 2H), 6.86–6.76 (m, 2H), 6.56 (s, 1H), 6.43 (s, 1H), 4.87 (s, 1H), 3.85 (s, 3H), 3.75 (s, 3H), 3.73 (s, 3H), 3.22 (m, 1H), 2.91 (m, 1H), 1.33 (d,  $J = 6.8$  Hz, 3H), 1.18 (d,  $J = 6.8$  Hz, 3H), 0.97 (d,  $J = 7.0$  Hz, 3H), 0.80 (d,  $J = 6.6$  Hz, 3H).  $^{13}\text{C}$  NMR (126 MHz,  $\text{CDCl}_3$ )  $\delta$  207.95, 161.38, 158.39, 148.56, 145.72, 143.35, 137.93, 128.83, 115.35, 114.17, 112.18, 110.92, 100.06, 56.29, 56.01, 55.16, 41.49, 37.72, 30.08,

20.37, 19.78, 19.26, 17.64. IR (film):  $\nu = 2966, 2933, 1682, 1608, 1508, 1465, 1303, 1264, 1225, 1192, 1129, 1056, 1033, 944, 842, 732, 560 \text{ cm}^{-1}$ ; HRMS (ESI):  $m/z$ : calcd. for  $\text{C}_{25}\text{H}_{31}\text{O}_5^+$   $[\text{M}+\text{H}]^+$ : 411.2166; found: 411.2164.

#### 4.2 The reaction of vinyl *o*-quinone methide with $\beta$ -keto esters.

In the nitrogen-filled flask, a solution of ligand **L1** (3.67mg, 0.01mmol) and  $\text{Ni}(\text{OTf})_2$  (3.57mg, 0.01mmol) in  $\text{CHCl}_3$  (1.5mL) was stirred at room temperature for 30min, ethyl acetoacetate (0.1mmol, 1.0eq) were added and stirred at room temperature for another 30 min. The mixture was cooled to  $-20^\circ\text{C}$  followed by addition of vinyl *o*-QMs (0.15mmol, 1.5eq), subsequently stirred at  $-20^\circ\text{C}$ . After completion of the reaction, the solution was warmed to  $40^\circ\text{C}$  and *p*-TsOH (3.5mg, 0.02mmol, 0.20 eq.) was added. After stirring for 1h, the solution was concentrated and purified by silica gel chromatography.

#### Ethyl (*S, E*)-6-methyl-8-styryl-8H-[1,3]dioxolo[4,5-*g*]chromene-7-carboxylate (**3ca**).

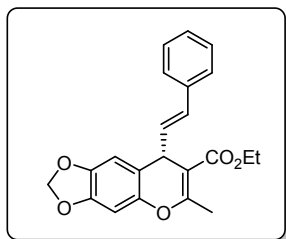

The title compound was purified by silica gel chromatography (Petroleum: EtOAc = 50: 1) to afford the product as a slight yellow oil, 74% yield.  $[\alpha]_D^{25} = -176.5$  ( $c = 0.84, \text{CH}_2\text{Cl}_2$ ); 88% ee, determined by HPLC analysis [Daicel Chiralcel OD-H column, *n*-hexane/*i*-PrOH = 95: 5, 0.5 mL/min, 254 nm;  $t$  (major) = 12.22 min,  $t$  (minor) = 11.37 min];  $^1\text{H NMR}$  (300 MHz,  $\text{CDCl}_3$ )  $\delta$  7.35 – 7.13 (m, 5H), 6.59 (s, 1H), 6.52 (s, 1H), 6.31 (d,  $J = 15.7 \text{ Hz}$ , 1H), 6.13 (dd,  $J = 15.7, 7.6 \text{ Hz}$ , 1H), 5.92 (dd,  $J = 3.4, 1.3 \text{ Hz}$ , 2H), 4.51 (d,  $J = 7.6 \text{ Hz}$ , 1H), 4.31 – 4.10 (m, 2H), 2.40 (s, 3H), 1.30 (t,  $J = 7.1 \text{ Hz}$ , 3H).  $^{13}\text{C NMR}$  (126 MHz,  $\text{CDCl}_3$ )  $\delta$  167.25, 160.52, 146.94, 144.53, 144.29, 137.09, 132.83, 129.09, 128.42, 127.25, 126.32, 115.21, 107.57, 103.85, 101.36, 98.03, 60.35, 60.17, 39.05, 19.46, 14.36. IR (film):  $\nu = 2916, 1707, 1651, 1618, 1500, 1480, 1441, 1379, 1324, 1231, 1193, 1150, 1066, 1037, 963, 938, 857, 781, 748, 693, 500 \text{ cm}^{-1}$ ; HRMS (ESI):  $m/z$ : calcd. for  $\text{C}_{22}\text{H}_{21}\text{O}_5^+$   $[\text{M}+\text{H}]^+$ : 365.1284, found: 365.1287.

#### Ethyl (*S, E*)-6-methyl-8-(4-methylstyryl)-8H-[1,3]dioxolo[4,5-*g*]chromene-7-carboxylate (**3da**).

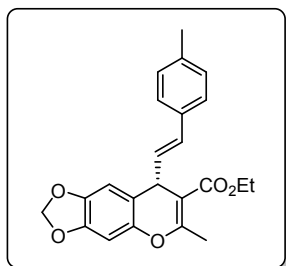

The title compound was purified by silica gel chromatography (PE: EtOAc = 50: 1) to afford the product, white solid, 70% yield. Mp. 48-52 $^\circ\text{C}$ ,  $[\alpha]_D^{25} = -137.4$  ( $c = 0.73, \text{CH}_2\text{Cl}_2$ ); 90% ee, determined by HPLC analysis [Daicel Chiralcel OD-H column, *n*-hexane/*i*-PrOH = 90: 10, 0.8 mL/min, 254 nm;  $t$  (major) = 22.37 min,  $t$  (minor) = 20.35 min];  $^1\text{H NMR}$  (300 MHz,  $\text{CDCl}_3$ )  $\delta$  7.19 (d,  $J = 8.1 \text{ Hz}$ , 2H), 7.06 (d,  $J = 7.9 \text{ Hz}$ , 2H), 6.58 (s, 1H), 6.52 (s, 1H), 6.28 (d,  $J = 15.7 \text{ Hz}$ , 1H), 6.07 (dd,  $J = 15.7, 7.7 \text{ Hz}$ , 1H), 5.2 (dd,  $J = 3.2, 1.3 \text{ Hz}$ , 2H), 4.49 (d,  $J = 7.7 \text{ Hz}$ , 1H), 4.32 – 4.10 (m, 2H), 2.40 (s, 3H), 2.30 (s, 3H), 1.30 (t,  $J = 7.1 \text{ Hz}$ , 3H).  $^{13}\text{C NMR}$  (75 MHz,  $\text{CDCl}_3$ )  $\delta$  167.30, 160.37, 146.89, 144.51,

144.26, 137.03, 134.29, 131.84, 129.11, 128.96, 126.22, 115.36, 107.61, 103.96, 101.34, 98.00, 60.14, 39.05, 21.11, 19.43, 14.36. IR (film):  $\nu = 2918, 1708, 1652, 1619, 1501, 1480, 1379, 1323, 1231, 1194, 1151, 1067, 1038, 972, 938, 857, 810, 780, 507, 456 \text{ cm}^{-1}$ ; HRMS (ESI):  $m/z$ : calcd. for  $\text{C}_{23}\text{H}_{23}\text{O}_5^+ [\text{M}+\text{H}]^+$ : 379.1540; found: 379.1539.

**Ethyl (*S, E*)-8-(4-methoxystyryl)-6-methyl-8H-[1,3]dioxolo[4,5-*g*]chromene-7-carboxylate (3ea).**

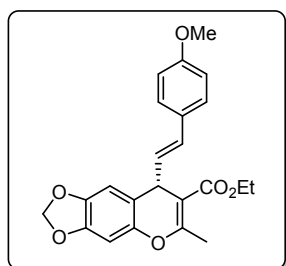

The title compound was purified by silica gel chromatography (PE: EtOAc = 50: 1) to afford the product: white solid, 58% yield. Mp. 78-81°C,  $[\alpha]_D^{25} = -86.8$  ( $c = 0.80, \text{CH}_2\text{Cl}_2$ ); 80% ee, determined by HPLC analysis [Daicel Chiralcel AD-H column, n-hexane/*i*-PrOH = 90: 10, 0.8 mL/min, 254 nm;  $t$  (major) = 19.66 min,  $t$  (minor) = 10.59 min];  $^1\text{H}$  NMR (300 MHz,  $\text{CDCl}_3$ )  $\delta$  7.25 – 7.19 (m, 2H), 6.83 – 6.76 (m, 2H), 6.59 (s, 1H), 6.52 (s, 1H), 6.25 (d,  $J = 15.6$  Hz, 1H), 5.99 (dd,  $J = 15.6, 7.7$  Hz, 1H), 5.92 (dd,  $J = 3.0, 1.3$  Hz, 2H), 4.48 (d,  $J = 7.7$  Hz, 1H), 4.32 – 4.09 (m, 2H), 3.78 (s, 3H), 2.39 (s, 3H), 1.30 (t,  $J = 7.1$  Hz, 3H).  $^{13}\text{C}$  NMR (75 MHz,  $\text{CDCl}_3$ )  $\delta$  167.33, 160.31, 159.02, 146.87, 144.52, 144.26, 130.81, 129.90, 128.51, 127.45, 115.48, 113.89, 107.60, 104.07, 101.34, 97.99, 60.14, 55.27, 39.03, 19.44, 14.37. IR (film):  $\nu = 2916, 2848, 1706, 1651, 1607, 1510, 1480, 1440, 1379, 1263, 1193, 1150, 1067, 1036, 937, 895, 823, 732, 522 \text{ cm}^{-1}$ ; HRMS (ESI):  $m/z$ : calcd. for  $\text{C}_{23}\text{H}_{23}\text{O}_6^+ [\text{M}+\text{H}]^+$ : 395.1489; found: 395.1490.

**Ethyl (*S, E*)-8-(4-fluorostyryl)-6-methyl-8H-[1,3]dioxolo[4,5-*g*]chromene-7-carboxylate (3fa).**

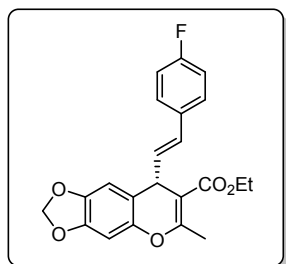

The title compound was purified by silica gel chromatography (PE: EtOAc = 50: 1) to afford the product: white solid, 82% yield. Mp. 43-45°C,  $[\alpha]_D^{25} = -116.4$  ( $c = 0.97, \text{CH}_2\text{Cl}_2$ ); 92% ee, determined by HPLC analysis [Daicel Chiralcel AD-H column, n-hexane/*i*-PrOH = 90: 10, 0.8 mL/min, 254 nm;  $t$  (major) = 12.49 min,  $t$  (minor) = 7.81 min];  $^1\text{H}$  NMR (300 MHz,  $\text{CDCl}_3$ )  $\delta$  7.31 – 7.21 (m, 2H), 6.99 – 6.89 (m, 2H), 6.58 (s, 1H), 6.53 (s, 1H), 6.26 (d,  $J = 15.7$  Hz, 1H), 6.05 (dd,  $J = 15.7, 7.6$  Hz, 1H), 5.92 (dd,  $J = 2.9, 1.3$  Hz, 2H), 4.50 (d,  $J = 7.6$  Hz, 1H), 4.32 – 4.11 (m, 2H), 2.40 (s, 3H), 1.30 (t,  $J = 7.1$  Hz, 3H).  $^{13}\text{C}$  NMR (75 MHz,  $\text{CDCl}_3$ )  $\delta$  167.22, 162.12 (d,  $J = 246.8$  Hz), 160.62, 146.97, 144.55, 144.32, 133.23 (d,  $J = 3.3$  Hz), 132.60 (d,  $J = 2.2$  Hz), 127.89, 127.77 (d,  $J = 7.9$  Hz), 115.28 (d,  $J = 21.6$  Hz), 107.49, 103.80, 101.38, 98.05, 60.19, 38.98, 19.49, 14.36. IR (film):  $\nu = 2980, 2917, 2849, 1707, 1652, 1619, 1507, 1480, 1441, 1379, 1324, 1228, 1194, 1151, 1067, 1038, 972, 938, 824, 780, 514 \text{ cm}^{-1}$ ; HRMS (ESI):  $m/z$ : calcd. for  $\text{C}_{22}\text{H}_{20}\text{FO}_5^+ [\text{M}+\text{H}]^+$ : 383.1289; found: 383.1288.

**Ethyl (*S, E*)-8-(4-chlorostyryl)-6-methyl-8H-[1,3]dioxolo[4,5-*g*]chromene-7-carboxylate (3ga).**

The title compound was purified by silica gel chromatography (PE: EtOAc = 50: 1) to afford the

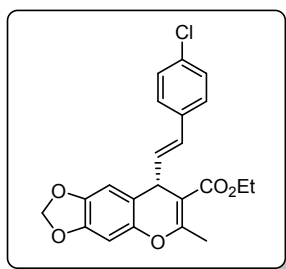

product, colorless oil, 82% yield.  $[\alpha]_D^{25} = -125.3$  ( $c = 0.83$ ,  $\text{CH}_2\text{Cl}_2$ ); 88% ee, determined by HPLC analysis [Daicel Chiralcel AD-H column, n-hexane/i-PrOH = 90: 10, 0.8 mL/min, 254 nm;  $t$  (major) = 13.39 min,  $t$  (minor) = 8.54 min];  $^1\text{H NMR}$  (300 MHz,  $\text{CDCl}_3$ )  $\delta$  7.22 (s, 4H), 6.57 (s, 1H), 6.53 (s, 1H), 6.25 (d,  $J = 15.7$  Hz, 1H), 6.11 (dd,  $J = 15.7, 7.4$  Hz, 1H), 5.93 (dd,  $J = 2.8, 1.3$  Hz, 2H), 4.50 (d,  $J = 7.4$  Hz, 1H), 4.32 – 4.11 (m, 2H), 2.40 (s, 3H), 1.30 (t,  $J = 7.1$  Hz, 3H).  $^{13}\text{C NMR}$  (126 MHz,  $\text{CDCl}_3$ )  $\delta$  167.18, 160.74, 147.02, 144.57, 144.35, 135.61, 133.50, 132.85, 128.55, 127.88, 127.52, 114.96, 107.48, 103.68, 101.40, 98.09, 60.21, 39.01, 19.51, 14.37. IR (film):  $\nu = 2980, 2918, 2849, 1707, 1652, 1619, 1480, 1441, 1379, 1324, 1231, 1195, 1151, 1067, 1038, 972, 938, 857, 817, 735, 503$   $\text{cm}^{-1}$ ; HRMS (ESI):  $m/z$ : calcd. for  $\text{C}_{22}\text{H}_{19}\text{ClO}_5^+$   $[\text{M}-\text{H}]^+$ : 397.0837; found: 397.0837.

**Ethyl (S, E)-6-methyl-8-(3-methylstyryl)-8H-[1,3]dioxolo[4,5-g]chromene-7-carboxylate (3ha).**

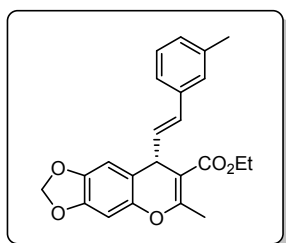

The title compound was purified by silica gel chromatography (PE: EtOAc = 50: 1) to afford the product as a slight yellow oil, 59% yield.  $[\alpha]_D^{25} = -139.6$  ( $c = 0.42$ ,  $\text{CH}_2\text{Cl}_2$ ); 91% ee, determined by HPLC analysis [Daicel Chiralcel OD-H column, n-hexane/i-PrOH = 98: 2, 0.3 mL/min, 254 nm;  $t$  (major) = 22.12 min,  $t$  (minor) = 20.12 min];  $^1\text{H NMR}$  (300 MHz,  $\text{CDCl}_3$ )  $\delta$  7.20 – 7.07 (m, 3H), 7.04 – 6.96 (m, 1H), 6.58 (s, 1H), 6.52 (s, 1H), 6.28 (d,  $J = 15.7$  Hz, 1H), 6.11 (dd,  $J = 15.7, 7.7$  Hz, 1H), 5.92 (dd,  $J = 3.4, 1.3$  Hz, 2H), 4.50 (d,  $J = 7.6$  Hz, 1H), 4.21 (qq,  $J = 10.8, 7.1$  Hz, 2H), 2.40 (s, 3H), 2.29 (s, 3H), 1.30 (t,  $J = 7.1$  Hz, 3H).  $^{13}\text{C NMR}$  (75 MHz,  $\text{CDCl}_3$ )  $\delta$  167.26, 160.44, 146.91, 144.52, 144.28, 137.95, 137.01, 132.62, 129.14, 128.32, 128.05, 126.96, 123.53, 115.27, 107.58, 103.89, 101.34, 98.00, 60.16, 39.06, 21.30, 19.44, 14.36. IR (film):  $\nu = 2917, 2849, 1708, 1652, 1619, 1480, 1440, 1379, 1323, 1231, 1194, 1151, 1068, 1038, 973, 938, 859, 780, 439$   $\text{cm}^{-1}$ ; HRMS (ESI):  $m/z$ : calcd. for  $\text{C}_{23}\text{H}_{22}\text{O}_5^+$   $[\text{M}-\text{H}]^+$ : 377.1384; found: 377.1383.

**Ethyl (S, E)-8-(2-methoxystyryl)-6-methyl-8H-[1,3]dioxolo[4,5-g]chromene-7-carboxylate (3ia).**

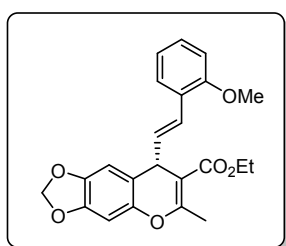

The title compound was purified by silica gel chromatography (PE: EtOAc = 50: 1) to afford the product as a slight yellow oil, 60% yield.  $[\alpha]_D^{25} = -62.5$  ( $c = 0.56$ ,  $\text{CH}_2\text{Cl}_2$ ); 87% ee, determined by HPLC analysis [Daicel Chiralcel OD-H column, n-hexane/i-PrOH = 90: 10, 0.8 mL/min, 254 nm;  $t$  (major) = 8.71 min,  $t$  (minor) = 7.32 min];  $^1\text{H NMR}$  (300 MHz,  $\text{CDCl}_3$ )  $\delta$  7.33 (dd,  $J = 7.6, 1.7$  Hz, 1H), 7.23–7.11 (m, 1H), 6.90 – 6.79 (m, 2H), 6.73 (d,  $J = 15.7$  Hz, 1H), 6.61 (s, 1H), 6.51 (s, 1H), 6.07 (dd,  $J = 15.8, 8.3$  Hz, 1H), 5.91 (dd,  $J = 4.1, 1.3$  Hz, 2H), 4.52 (d,  $J = 8.3$  Hz, 1H), 4.30 – 4.09 (m, 2H), 3.82 (s, 3H), 2.40 (s, 3H), 1.31 (t,  $J = 7.1$  Hz, 3H).  $^{13}\text{C NMR}$  (75 MHz,  $\text{CDCl}_3$ )  $\delta$  167.34, 160.07,

156.70, 146.83, 144.37, 144.21, 133.16, 128.25, 126.66, 126.09, 123.89, 120.49, 115.52, 110.82, 107.72, 104.01, 101.29, 97.95, 60.12, 55.37, 39.66, 19.32, 14.16. IR (film):  $\nu = 2918, 2849, 1707, 1652, 1619, 1480, 1438, 1379, 1323, 1244, 1194, 1151, 1067, 1037, 973, 937, 857, 708, 752, 582$   $\text{cm}^{-1}$ ; HRMS (ESI):  $m/z$ : calcd. for  $\text{C}_{23}\text{H}_{23}\text{O}_6^+$   $[\text{M}+\text{H}]^+$ : 395.1489; found: 395.1489.

**Ethyl (*S, E*)-6-methyl-8-(2-(thiophen-2-yl)vinyl)-8H-[1,3]dioxolo[4,5-g]chromene-7-carboxylate (3ja).**

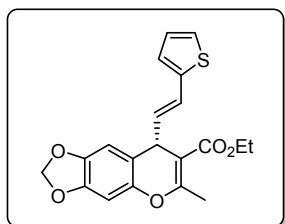

The title compound was purified by silica gel chromatography (PE: EtOAc = 50: 1) to afford the product, white solid, 56% yield. Mp. 67-70°C,  $[\alpha]_D^{25} = -164.0$  ( $c = 0.71, \text{CH}_2\text{Cl}_2$ ); 90% ee, determined by HPLC analysis [Daicel Chiralcel OD-H column, n-hexane/*i*-PrOH = 95: 5, 0.5 mL/min, 254 nm;  $t$  (major) = 13.04 min,  $t$  (minor) = 12.36 min];  $^1\text{H}$  NMR (300 MHz,  $\text{CDCl}_3$ )  $\delta$  7.08 (dt,  $J = 5.0, 0.9$  Hz, 1H), 6.97 – 6.84 (m, 2H), 6.58 (s, 1H), 6.52 (s, 1H), 6.41 (d,  $J = 15.6$  Hz, 1H), 5.99 (dd,  $J = 15.5, 7.6$  Hz, 1H), 5.93 (dd,  $J = 1.7, 1.3$  Hz, 2H), 4.47 (d,  $J = 7.6$  Hz, 1H), 4.36 – 4.09 (m, 2H), 2.40 (d,  $J = 0.7$  Hz, 3H), 1.31 (t,  $J = 7.1$  Hz, 3H).  $^{13}\text{C}$  NMR (126 MHz,  $\text{CDCl}_3$ )  $\delta$  167.15, 160.72, 146.98, 144.54, 144.31, 142.22, 132.57, 127.17, 125.29, 123.75, 122.41, 114.91, 107.51, 103.61, 101.37, 98.03, 60.19, 38.78, 19.49, 14.34. IR (film):  $\nu = 2917, 2849, 1708, 1651, 1619, 1480, 1441, 1379, 1333, 1231, 1196, 1151, 1067, 1037, 938, 855, 780, 423$   $\text{cm}^{-1}$ ; HRMS (ESI):  $m/z$ : calcd. for  $\text{C}_{20}\text{H}_{18}\text{O}_5\text{S}^+$   $[\text{M}-\text{H}]^+$ : 369.0791; found: 369.0789.

**Ethyl (*S, E*)-6-methyl-8-(2-(naphthalen-1-yl)vinyl)-8H-[1,3]dioxolo[4,5-g]chromene-7-carboxylate (3ka).**

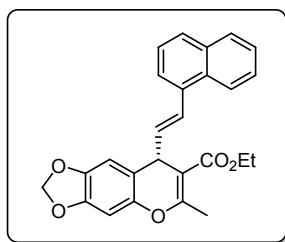

The title compound was purified by silica gel chromatography (PE: EtOAc = 50: 1) to afford the product as a colorless oil, 52% yield.  $[\alpha]_D^{25} = -73.2$  ( $c = 0.96, \text{CH}_2\text{Cl}_2$ ); 92% ee, determined by HPLC analysis [Daicel Chiralcel OD-H column, n-hexane/*i*-PrOH = 90: 10, 0.8 mL/min, 254 nm;  $t$  (major) = 10.18 min,  $t$  (minor) = 8.41 min];  $^1\text{H}$  NMR (500 MHz,  $\text{CDCl}_3$ )  $\delta$  8.03 (d,  $J = 8.2$  Hz, 1H), 7.81 (d,  $J = 7.9$  Hz, 1H), 7.71 (d,  $J = 8.2$  Hz, 1H), 7.47 (m, 3H), 7.36 (t,  $J = 7.7$  Hz, 1H), 7.07 (d,  $J = 15.3$  Hz, 1H), 6.68 (s, 1H), 6.55 (s, 1H), 6.16 (dd,  $J = 15.4, 7.7$  Hz, 1H), 5.92 (d,  $J = 8.1$  Hz, 2H), 4.65 (d,  $J = 7.7$  Hz, 1H), 4.25 (qq,  $J = 11.0, 7.2$  Hz, 2H), 2.43 (s, 3H), 1.32 (t,  $J = 7.2$  Hz, 3H).  $^{13}\text{C}$  NMR (126 MHz,  $\text{CDCl}_3$ )  $\delta$  167.31, 160.53, 146.97, 144.56, 144.35, 135.97, 134.80, 133.57, 131.20, 128.46, 127.61, 126.30, 125.87, 125.63, 125.51, 123.71, 115.21, 107.55, 103.89, 101.38, 98.10, 60.25, 39.43, 19.49, 14.41. IR (film):  $\nu = 2925, 1707, 1652, 1619, 1501, 1480, 1440, 1379, 1332, 1231, 1194, 1151, 1065, 1037, 972, 938, 859, 799, 779, 410$   $\text{cm}^{-1}$ ; HRMS (ESI):  $m/z$ : calcd. for  $\text{C}_{26}\text{H}_{23}\text{O}_5^+$   $[\text{M}+\text{H}]^+$ : 415.1540; found: 415.1543.

**4.3 Synthesis of (8-(4-methoxyphenyl)-8H-[1,3]dioxolo[4,5-g]chromen-7-yl)methanol (4).**

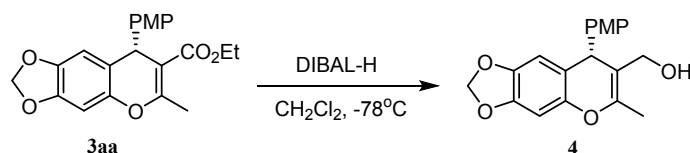

In the nitrogen-filled flask, a solution of **3aa** (2 mmol) in  $\text{CH}_2\text{Cl}_2$  was stirred at  $-78^\circ\text{C}$  for 30min, added DIBAL-H (4.4 mL, 2.2eq, 1.0M in hexane) then stirred at  $-78^\circ\text{C}$  for 1h. After completion, the solution was quenched with 15% NaOH(aq.) at  $0^\circ\text{C}$ , and extracted with  $\text{CH}_2\text{Cl}_2$  (5mL  $\times$  3). The organic layers were washed with  $\text{H}_2\text{O}$  (5 mL  $\times$  2) and then saturated NaCl (5 mL), dried over anhydrous  $\text{Na}_2\text{SO}_4$ , filtered and concentrated in vacuo. The crude product was purified by silica gel chromatography to give compound **4** (0.55g, 85% yield) as colorless oil.  $[\alpha]_D^{25} = -49.2$  ( $c = 0.96$ ,  $\text{CH}_2\text{Cl}_2$ ); 95% ee, determined by HPLC analysis [Daicel Chiralcel OD-H column, n-hexane/*i*-PrOH = 80: 20, 1.0 mL/min, 254 nm;  $t$  (major) = 7.55 min,  $t$  (minor) = 11.91 min];  $^1\text{H}$  NMR (300 MHz,  $\text{CDCl}_3$ )  $\delta$  7.24–7.12 (m, 2H), 6.93–6.79 (m, 2H), 6.51 (s, 1H), 6.37 (s, 1H), 5.87 (dd,  $J = 14.0, 1.4$  Hz, 2H), 4.59 (s, 1H), 4.06 (dd,  $J = 69.6, 12.1$  Hz, 2H), 3.79 (s, 3H), 2.07 (s, 3H), 1.35 (br, 1H).  $^{13}\text{C}$  NMR (75 MHz,  $\text{CDCl}_3$ )  $\delta$  158.37, 146.47, 146.00, 144.80, 143.36, 138.34, 129.05, 116.32, 114.07, 109.27, 107.77, 100.99, 97.60, 61.12, 55.16, 42.23, 15.84. IR (film):  $\nu = 3370, 2894, 1747, 1692, 1607, 1506, 1477, 1438, 1383, 1302, 1247, 1196, 1172, 1033, 981, 935, 873, 832, 802, 735, 663, 584, 552$   $\text{cm}^{-1}$ ; HRMS (ESI):  $m/z$ : calcd. for  $\text{C}_{19}\text{H}_{19}\text{O}_5^+$   $[\text{M}+\text{H}]^+$ : 327.1227; found: 327.1228.

#### 4.4 Synthesis of 7-(azidomethyl)-8-(4-methoxyphenyl)-6-methyl-8H-[1,3]dioxolo[4,5-g]chromene (**5**)

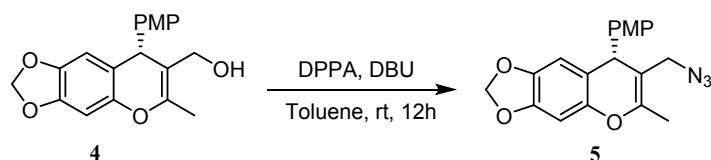

Compound **4** (0.3mmol, 1eq.) and DPPA (0.45mmol, 1.5eq.) was dissolved in toluene (2mL), then DBU(0.45mmol, 1.5eq.) was added, and stirred at room temperature for 12h. After completion of the reaction, the solution was concentrated and purified by silica gel chromatography to give compound **5** (64mg, 61% yield) as a slight yellow oil.  $[\alpha]_D^{25} = 20.9$  ( $c = 1.68$ ,  $\text{CH}_2\text{Cl}_2$ ); 90% ee, determined by HPLC analysis [Daicel Chiralcel OD-H column, n-hexane/*i*-PrOH = 90:10, 0.8 mL/min, 254 nm;  $t$  (major) = 9.50 min,  $t$  (minor) = 8.00 min];  $^1\text{H}$  NMR (300 MHz,  $\text{CDCl}_3$ )  $\delta$  7.15 – 7.07 (m, 2H), 6.87– 6.78 (m, 2H), 6.47 (s, 1H), 6.31 (s, 1H), 5.85 (dd,  $J = 12.1, 1.4$  Hz, 2H), 4.48 (s, 1H), 3.77 (s, 3H), 3.69(dd,  $J = 135.3, 13.5$ Hz), 2.06 (s, 3H);  $^{13}\text{C}$  NMR (75 MHz,  $\text{CDCl}_3$ )  $\delta$  158.53, 147.16, 146.64, 144.55, 143.60, 137.47, 129.18, 115.78, 114.07, 107.88, 104.68, 101.10, 97.65, 55.19, 50.75, 42.61, 16.27; IR (film):  $\nu = 3002, 2953, 2900, 2836, 2094, 1689, 1608, 1506, 1477, 1438, 1200, 1172, 1034, 937, 880, 734, 585$   $\text{cm}^{-1}$ ; HRMS (ESI):  $m/z$ : calcd. for  $\text{C}_{19}\text{H}_{18}\text{NO}_4^+$   $[\text{M}+\text{H}-\text{N}_2]^+$ : 324.1236, found: 324.1232.

#### 4.5 Synthesis of 9-(4-methoxyphenyl)-6,9-dihydro-8H-[1,3]dioxolo[4,5-g]furo-



**[3,4-b]chromen-8-one (3ak).**

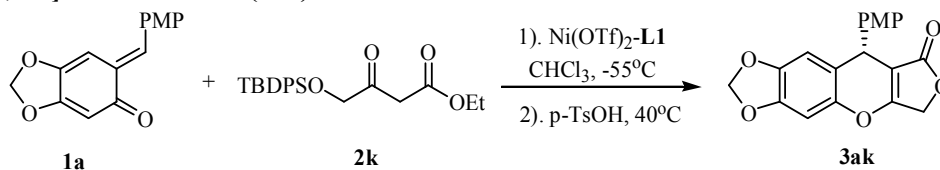

In the nitrogen-filled flask, a solution of ligand L1 (3.67mg, 0.011mmol) and Ni(OTf)<sub>2</sub> (3.57mg, 0.01mmol) in CHCl<sub>3</sub>(1mL) was stirred at room temperature for 30min, followed by added **2k** (0.1mmol, 1.0eq) and stirred for another 30 min. After the mixture was cooled to -55°C, a solution of *o*-QMs **1a** (0.15mmol, 1.5eq.) in CHCl<sub>3</sub> (0.5mL) was added over 10min, and stirred at -55°C. After completion of the reaction, the solution was heated to 40°C and *p*-TsOH (3.5mg, 0.02mmol, 0.20eq.) was added. After stirring for 12h at this temperature, the solution was concentrated and purified by silica gel chromatography to afford **3ak** (25.4mg, 75% yield) as slight yellow solid.  $[\alpha]_D^{25} = -97.4$  (c 1.02, CH<sub>2</sub>Cl<sub>2</sub>); 92% ee, determined by HPLC analysis [Daicel Chiralcel OD-H column, n-hexane/*i*-PrOH = 80:20, 1.0 mL/min, 254 nm; t (major) = 19.29 min, t (minor) = 27.36 min]; <sup>1</sup>H NMR (500 MHz, CDCl<sub>3</sub>) δ 7.16–7.07 (m, 2H), 6.87–6.78 (m, 2H), 6.63 (s, 1H), 6.45 (s, 1H), 5.94 (dd, *J* = 14.8, 1.3 Hz, 2H), 4.81 (dd, *J* = 15.2, 7.8 Hz, 2H), 4.80 (s, 1H), 3.77 (s, 3H); <sup>13</sup>C NMR (126 MHz, CDCl<sub>3</sub>) δ 170.82, 167.90, 158.74, 147.43, 145.55, 144.66, 135.22, 129.30, 115.75, 114.10, 108.97, 103.59, 101.91, 98.49, 65.50, 55.24, 37.52; IR (film): ν = 2921, 1760, 1694, 1609, 1508, 1480, 1405, 1346, 1303, 1245, 1174, 1137, 1030, 1009, 933, 867, 849, 788, 767, 735, 608, 570, 526 cm<sup>-1</sup>; HRMS (ESI): *m/z*: calcd. for C<sub>19</sub>H<sub>15</sub>O<sub>6</sub><sup>+</sup> [M+H]<sup>+</sup>: 339.0863, found: 339.0851.

## 5. NMR Spectra

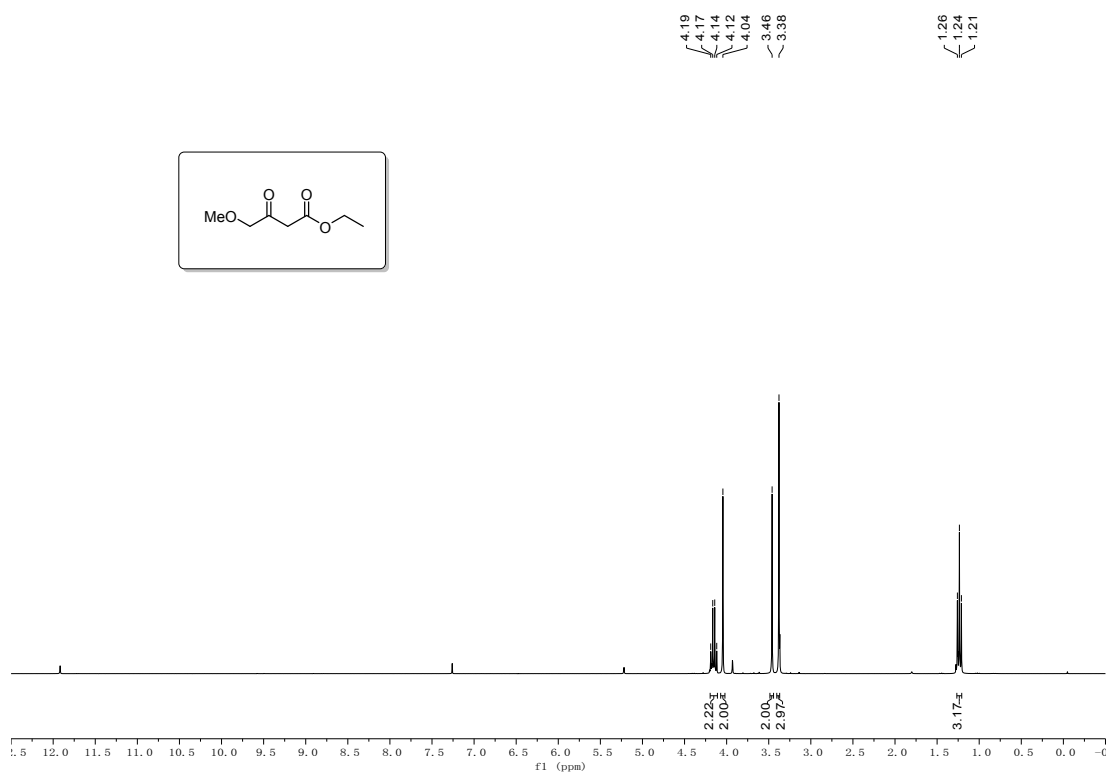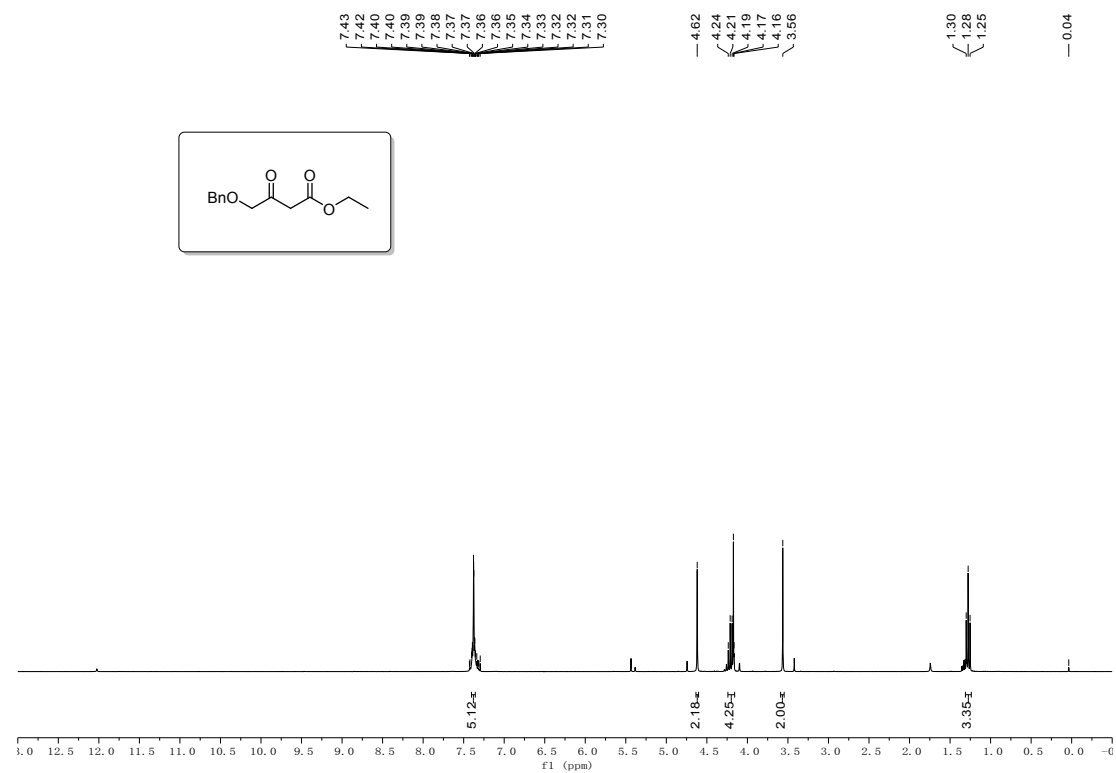

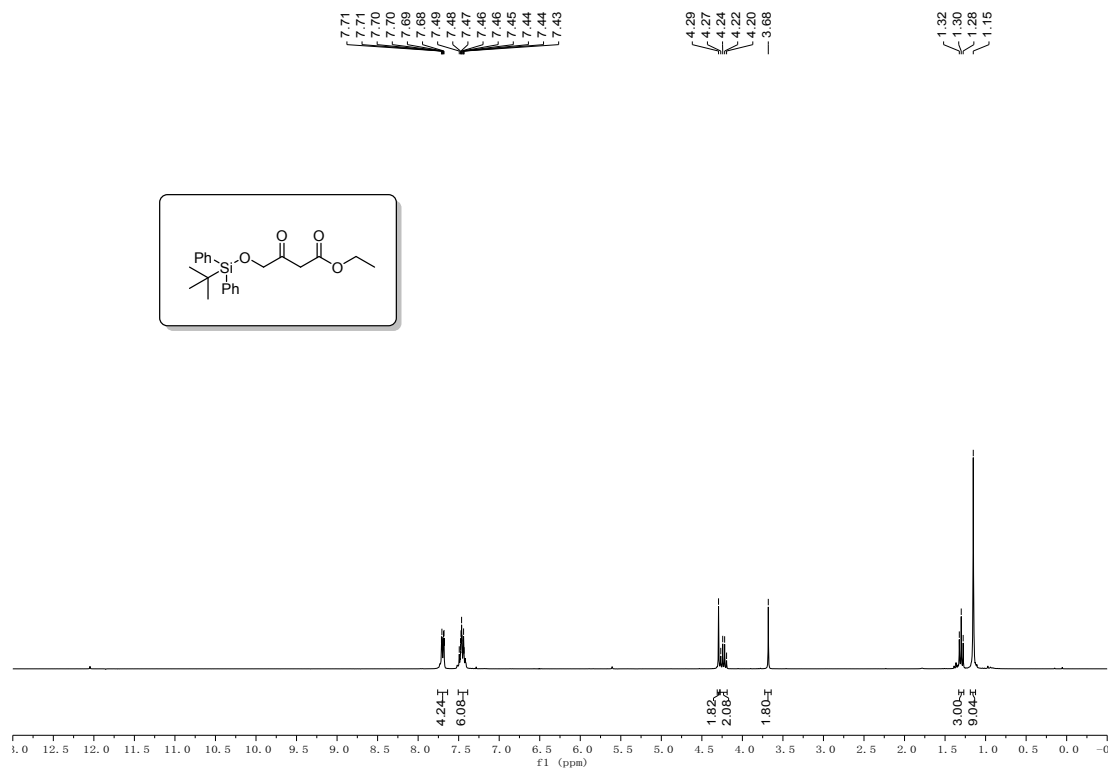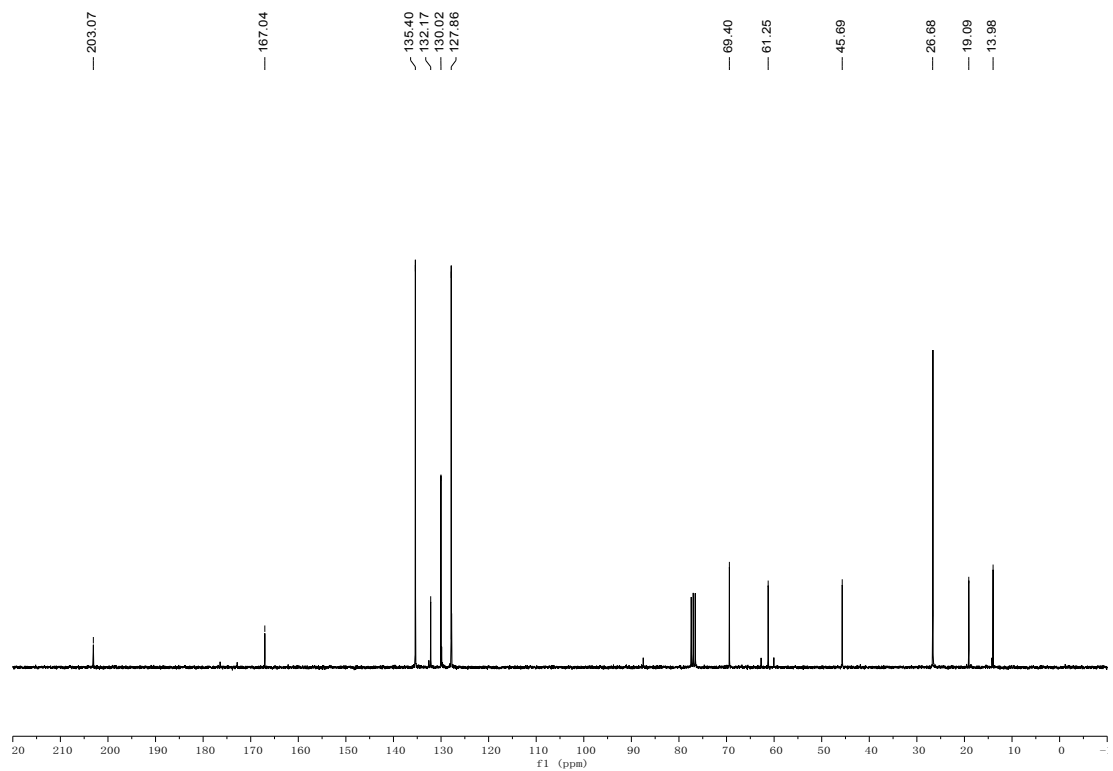

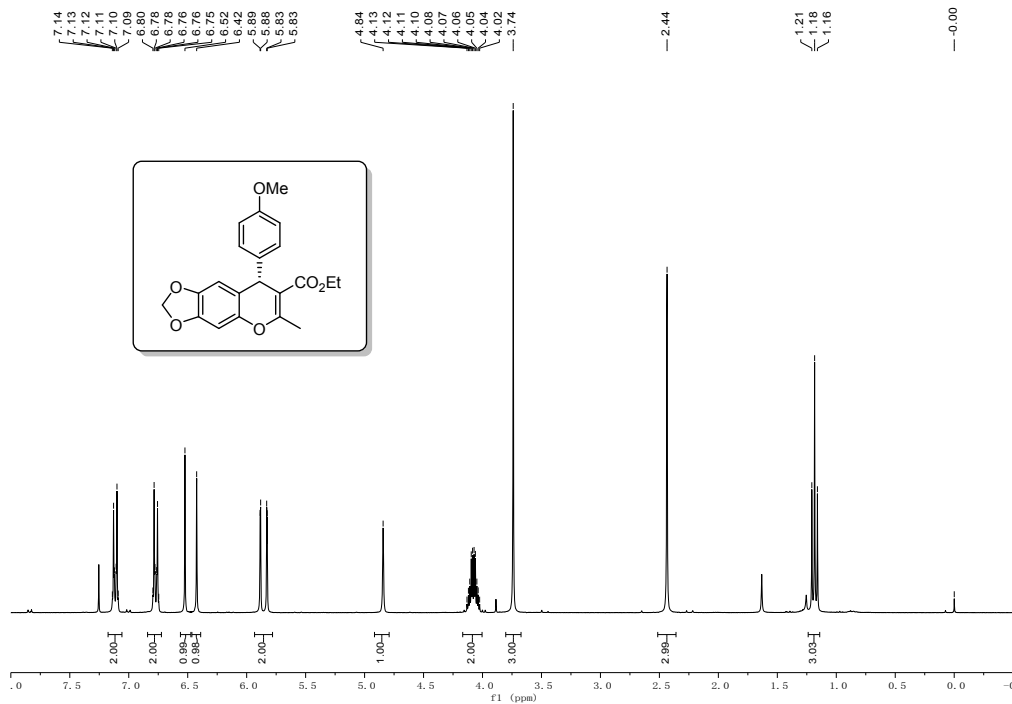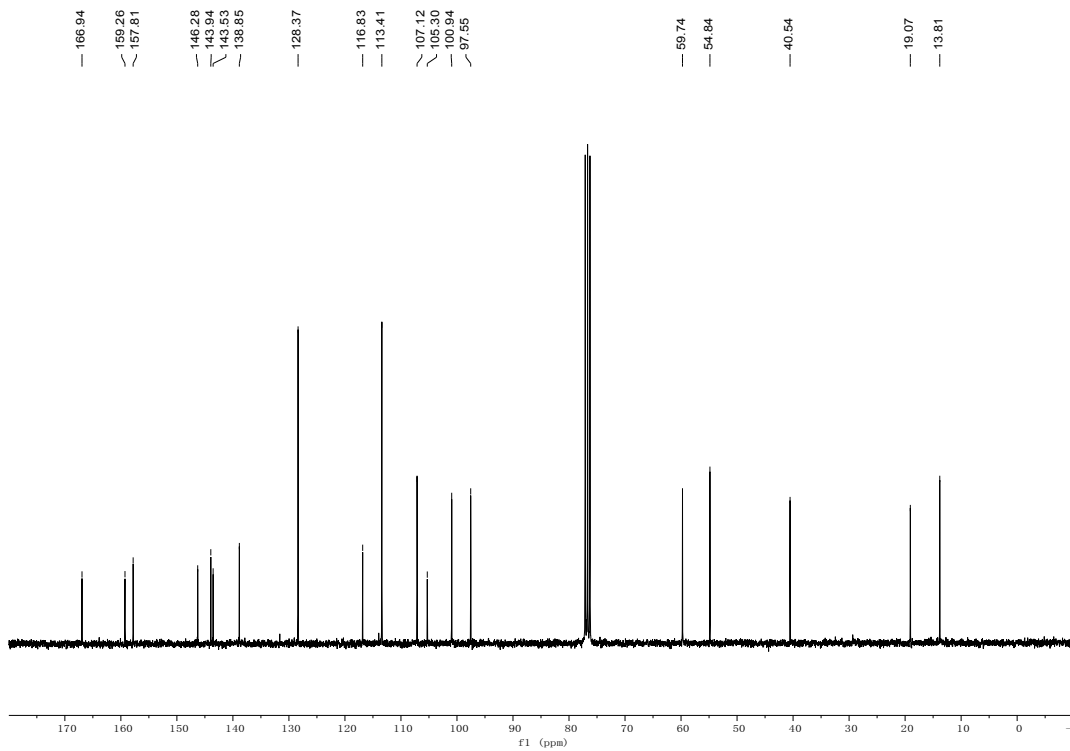

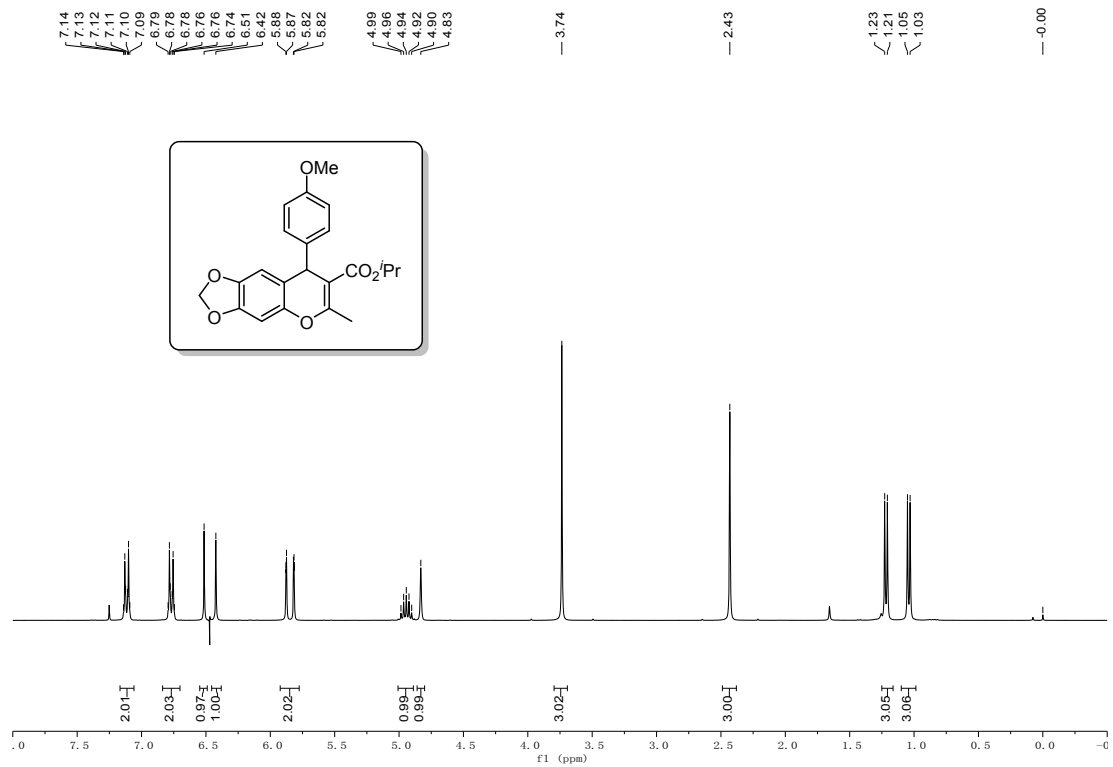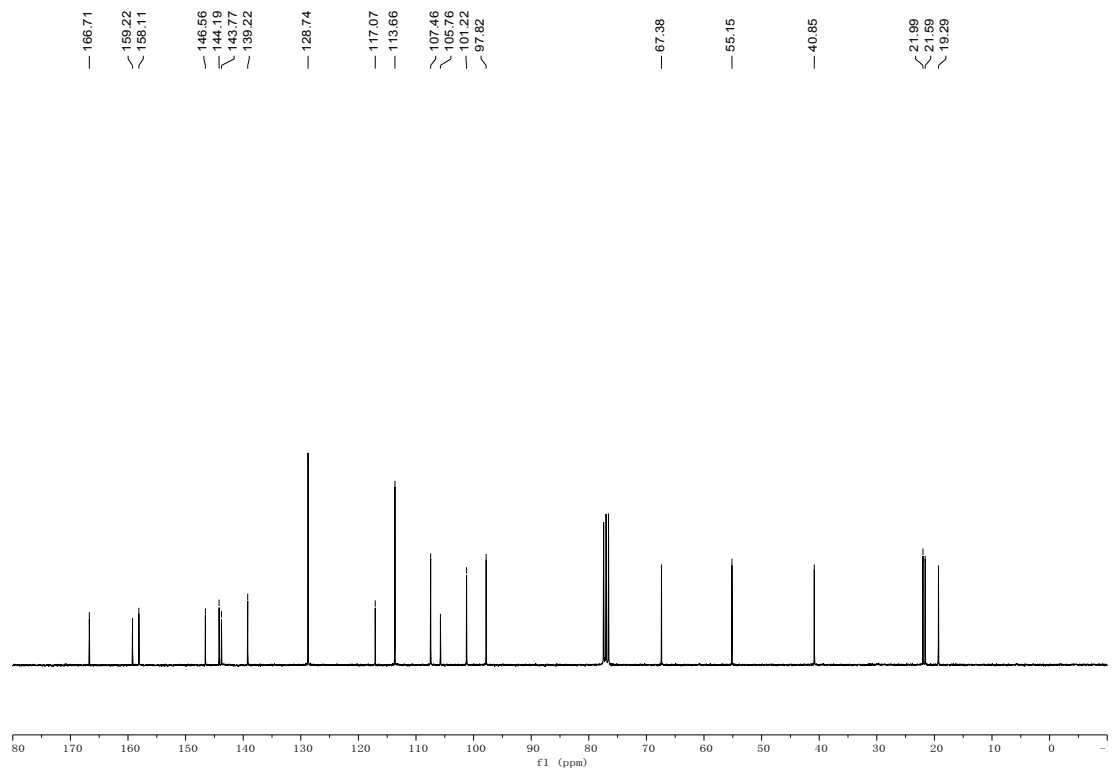

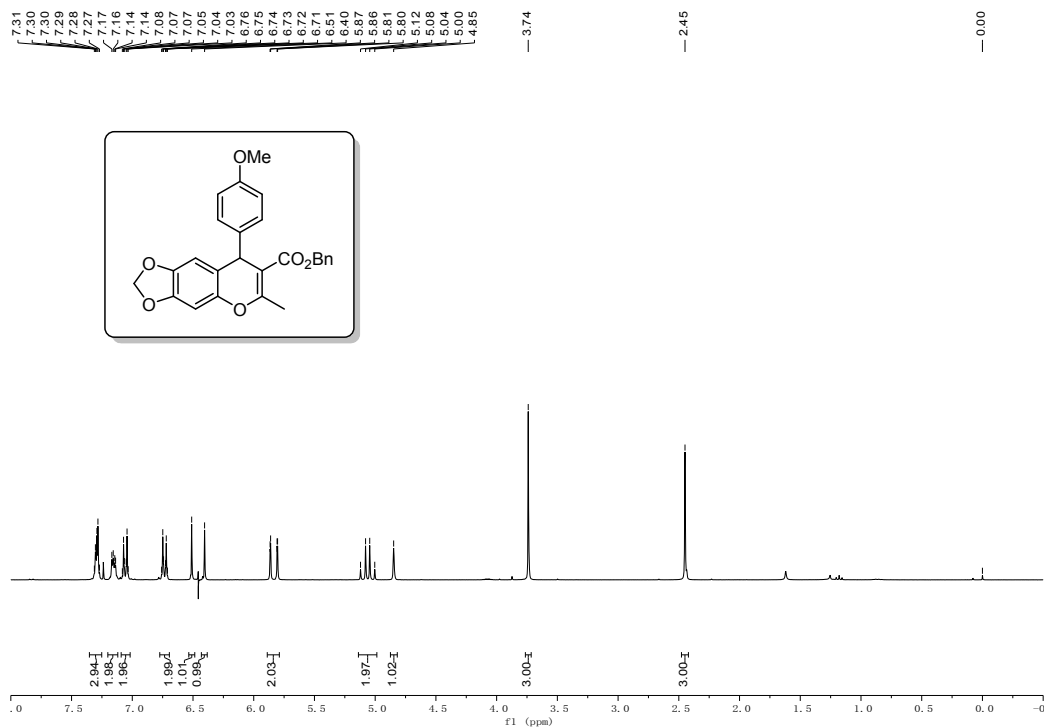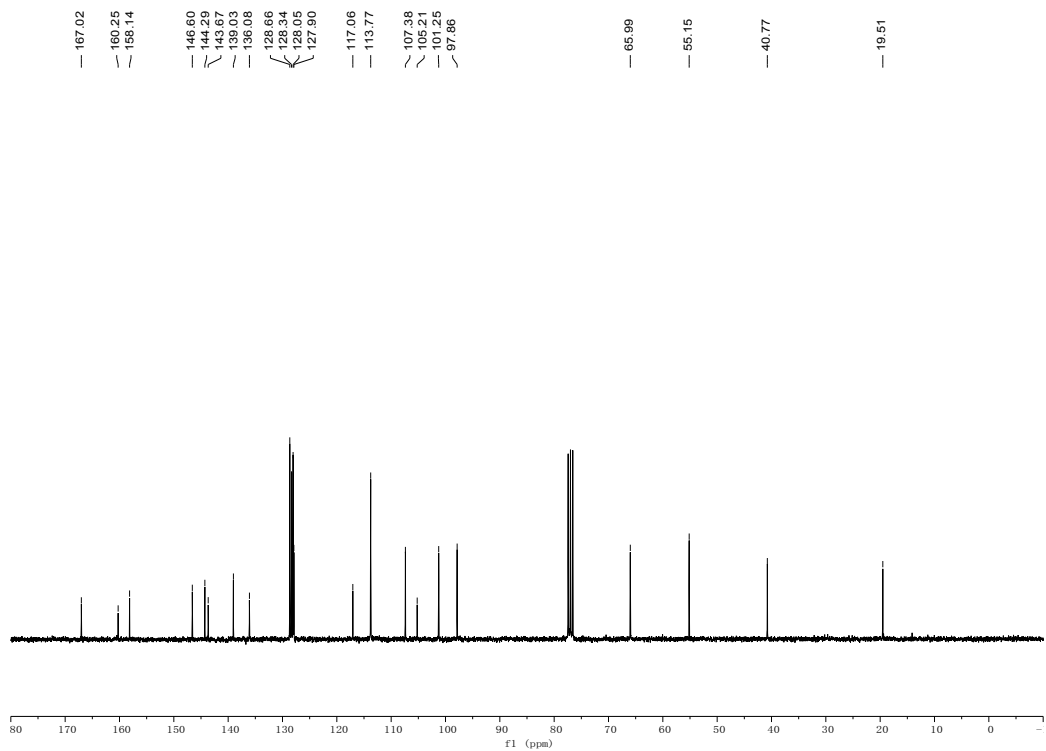

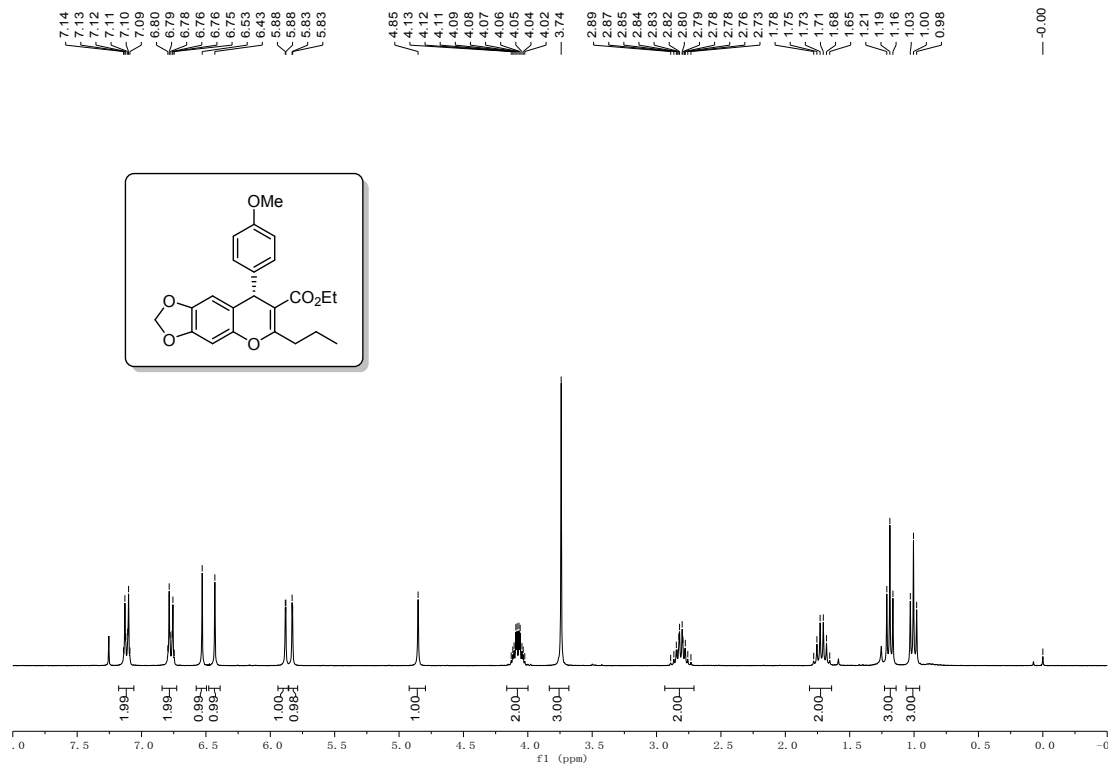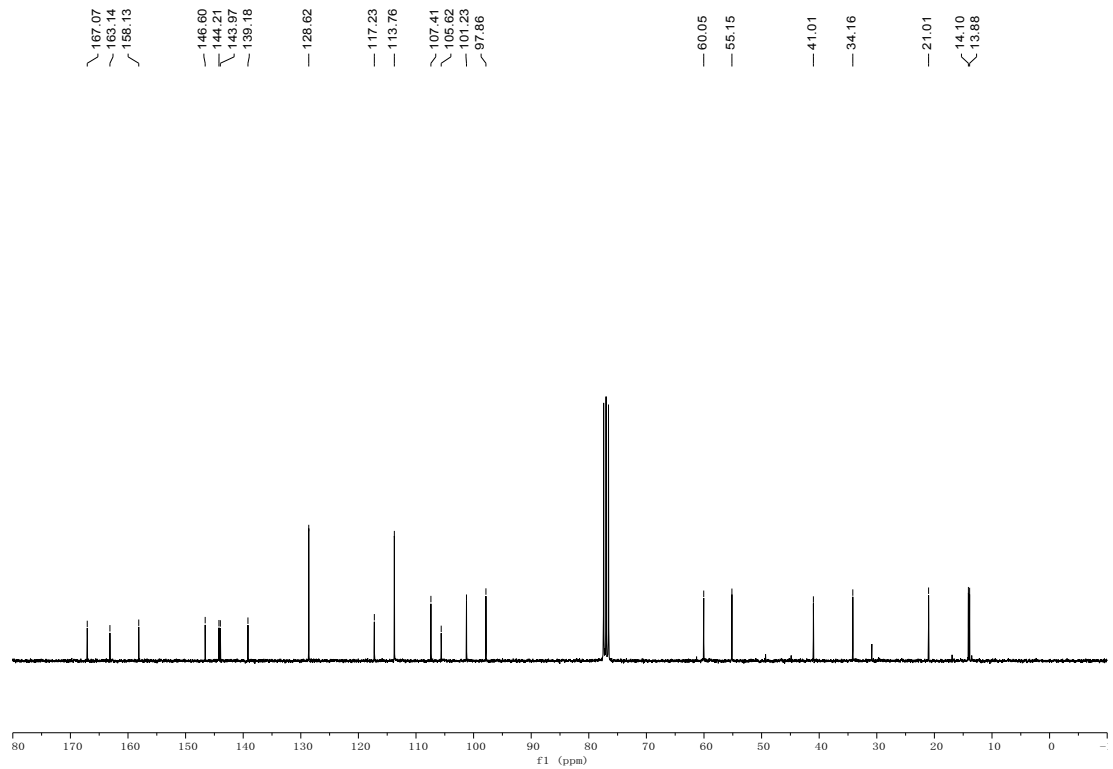

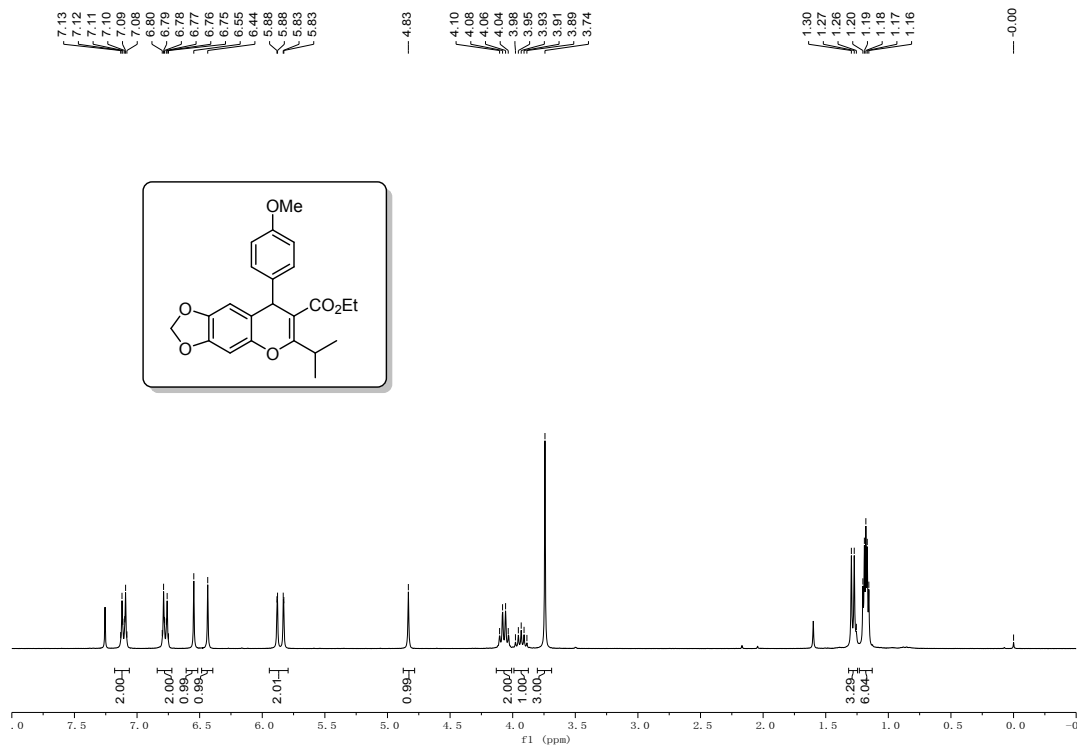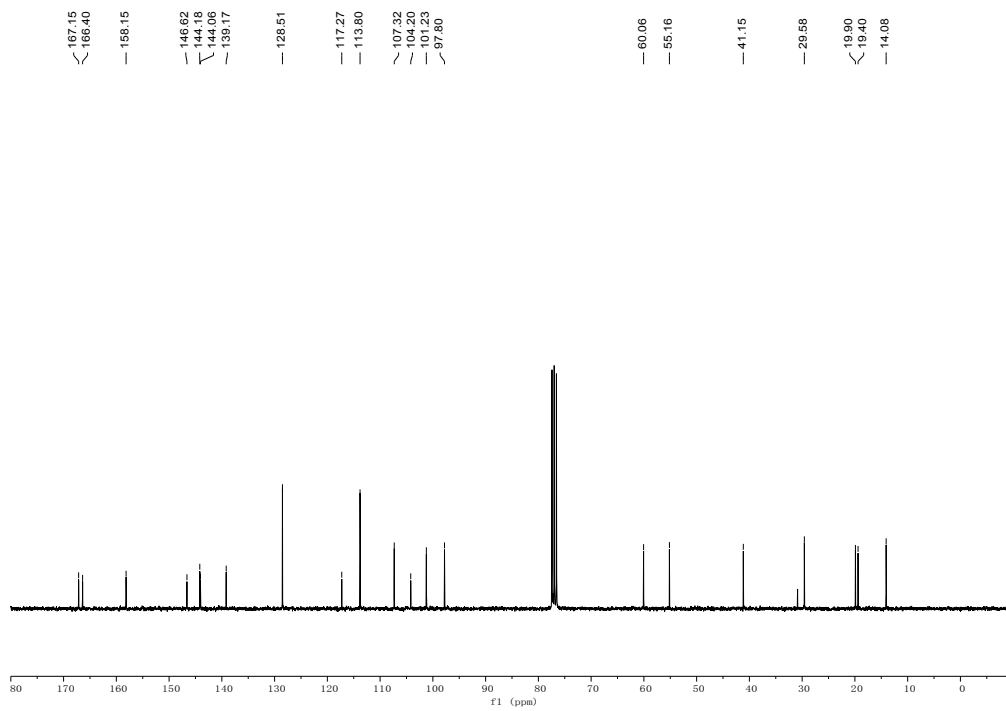



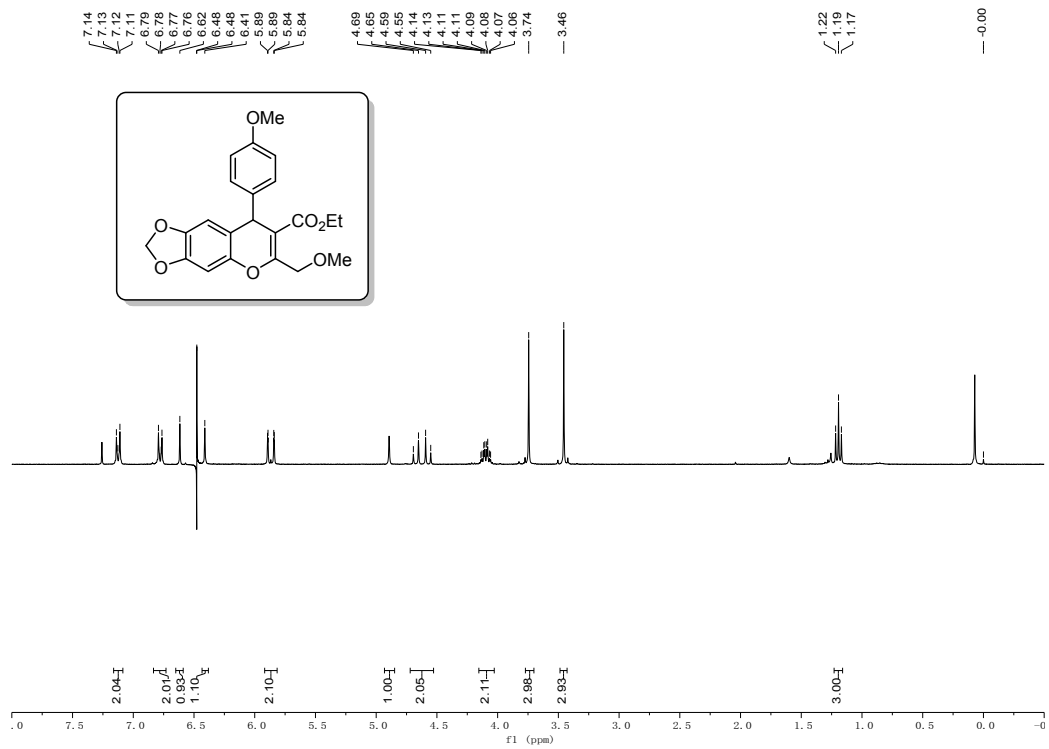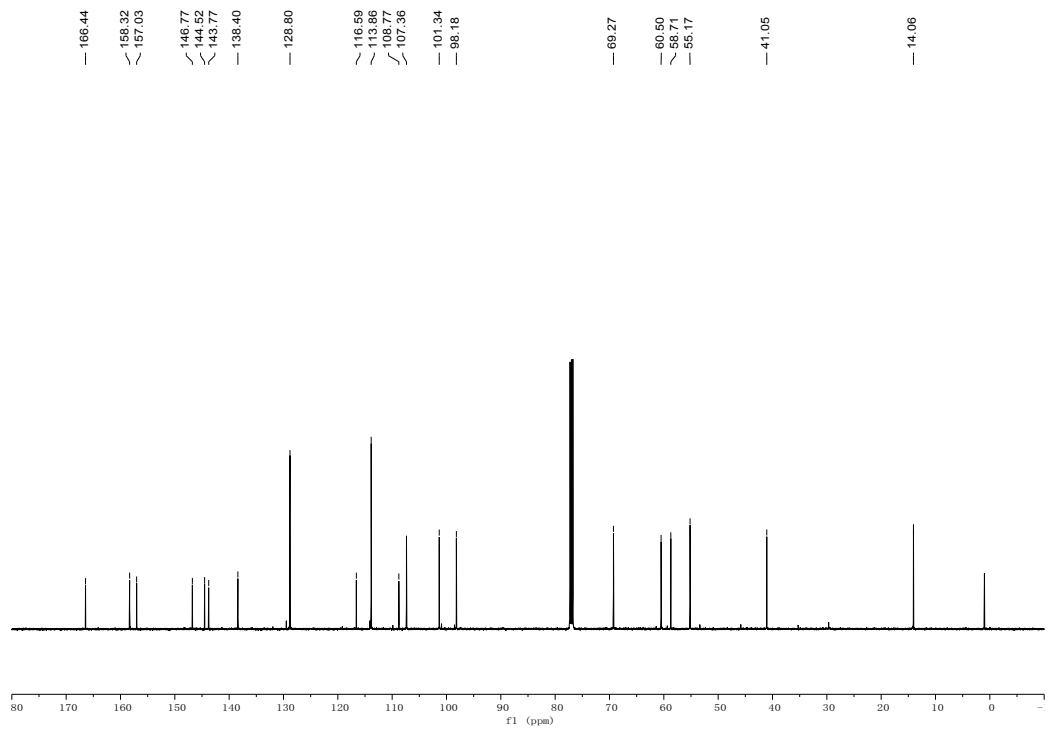

7.39  
7.39  
7.37  
7.37  
7.36  
7.36  
7.35  
7.35  
7.34  
7.34  
7.34  
7.33  
7.33  
7.31  
7.31  
7.30  
7.30  
7.29  
7.29  
7.28  
7.28  
7.19  
7.19  
7.13  
7.13  
7.11  
7.11  
7.10  
6.80  
6.80  
6.79  
6.79  
6.78  
6.78  
6.76  
6.76  
6.75  
6.75  
6.61  
6.61  
5.89  
5.89  
5.88  
5.88  
5.83  
5.83  
4.89  
4.89  
4.85  
4.85  
4.81  
4.81  
4.68  
4.68  
4.63  
4.63  
4.58  
4.58  
4.55  
4.55  
4.10  
4.10  
4.09  
4.09  
4.07  
4.07  
4.05  
4.05  
4.03  
4.03  
3.74

1.17  
1.15  
1.13

0.00

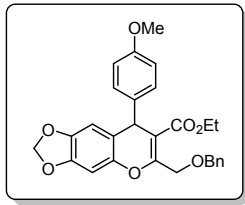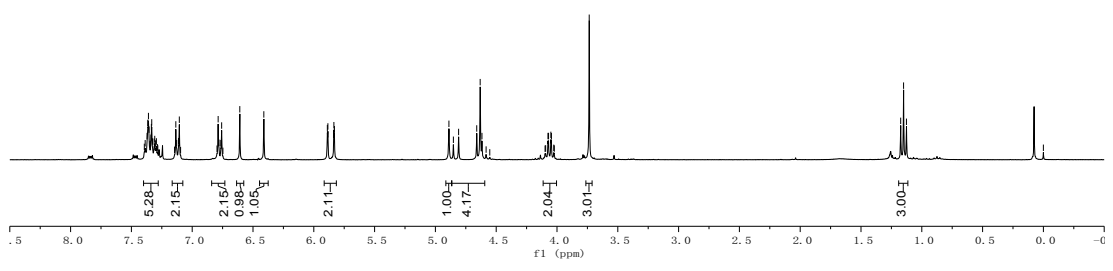

166.42  
158.90  
157.15  
146.76  
144.44  
143.80  
138.37  
138.08  
128.79  
128.31  
127.85  
127.66  
127.65  
125.75  
116.60  
113.85  
108.77  
107.36  
101.32  
96.15  
72.85  
67.08  
60.47  
55.15  
41.08  
14.02

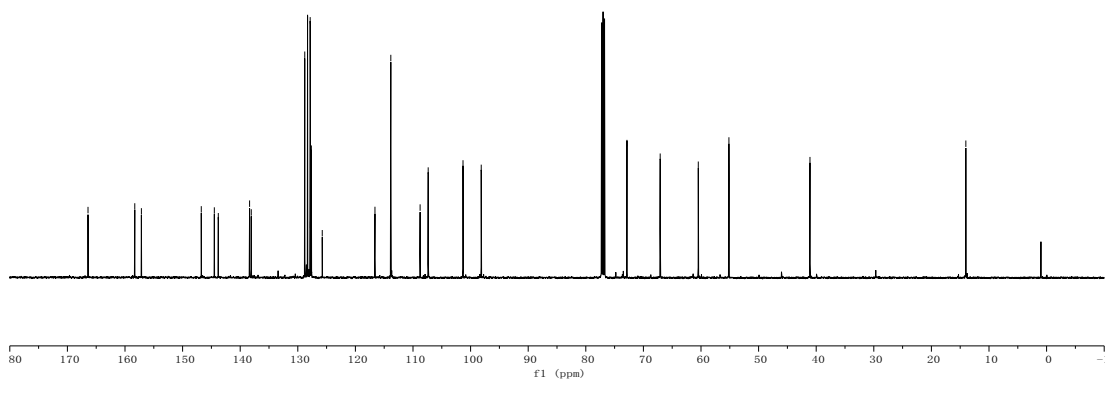

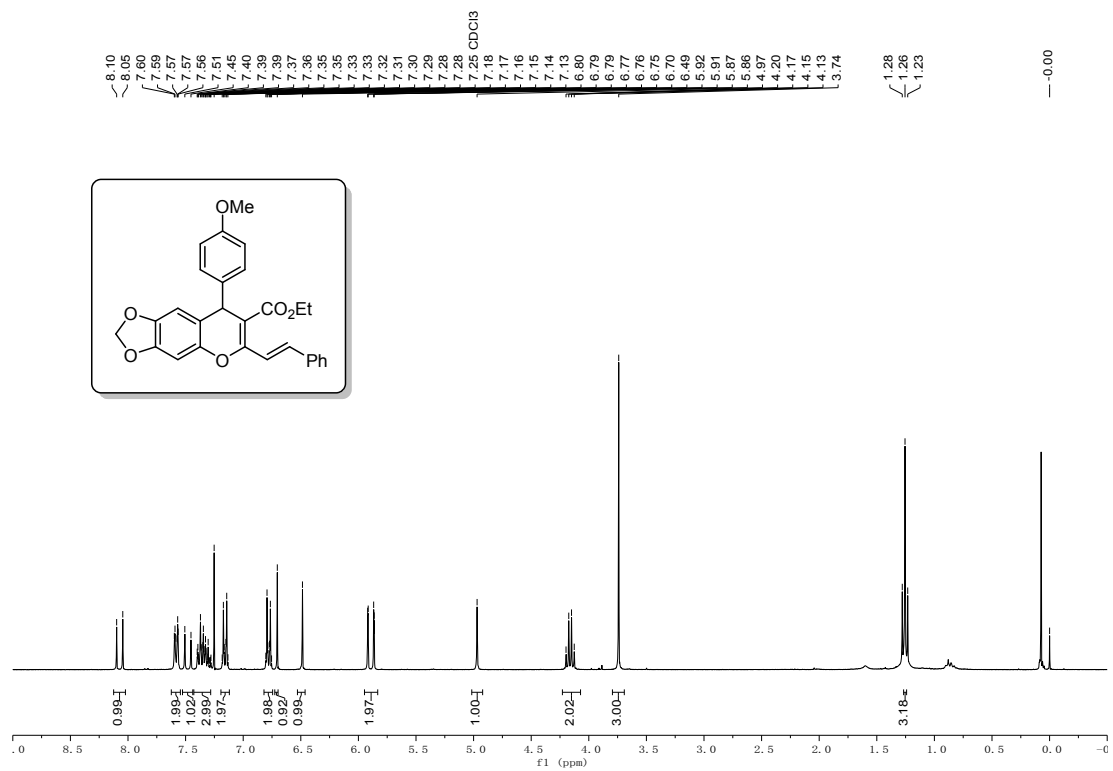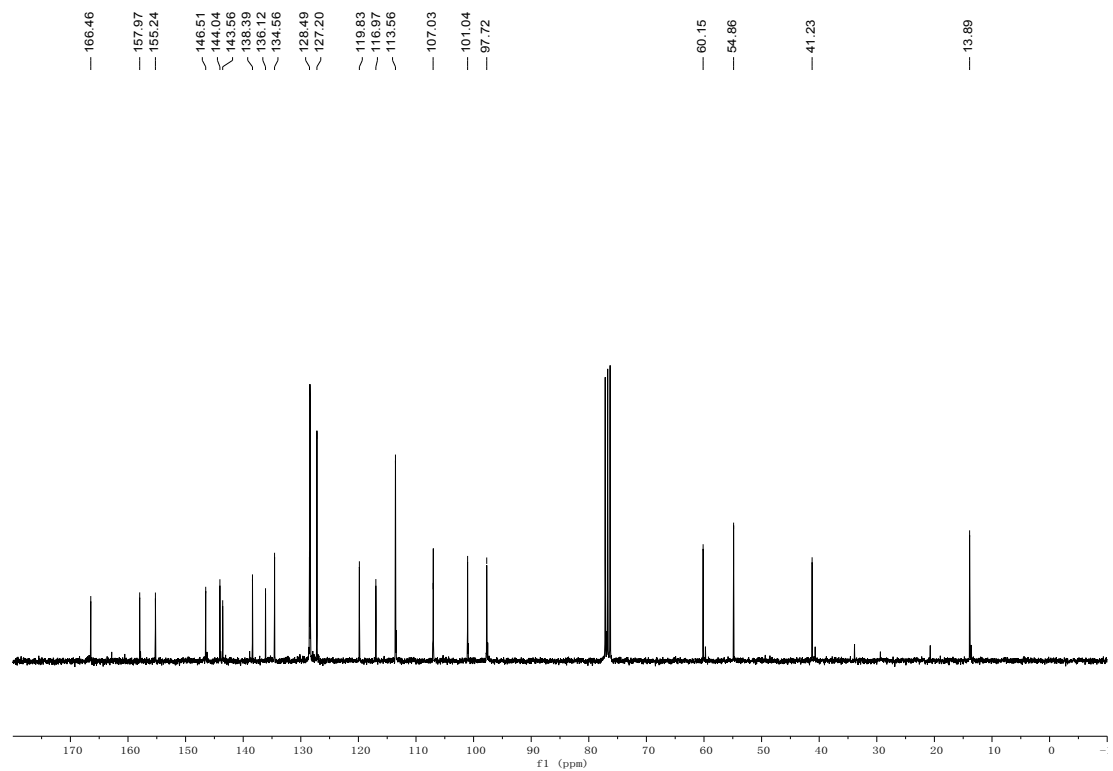

7.49  
7.49  
7.48  
7.48  
7.48  
7.47  
7.47  
7.47  
7.46  
7.46  
7.45  
7.43  
7.43  
7.43  
7.42  
7.42  
7.41  
7.41  
7.40  
7.40  
7.40  
7.39  
7.27  
7.26  
7.25  
7.23  
7.23  
7.22  
6.85  
6.84  
6.83  
6.81  
6.81  
6.80  
6.80  
6.49  
5.91  
5.91  
5.86  
4.97  
4.97  
3.90  
3.87  
3.85  
3.82  
3.76

0.87  
0.84  
0.82

0.00

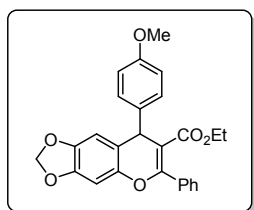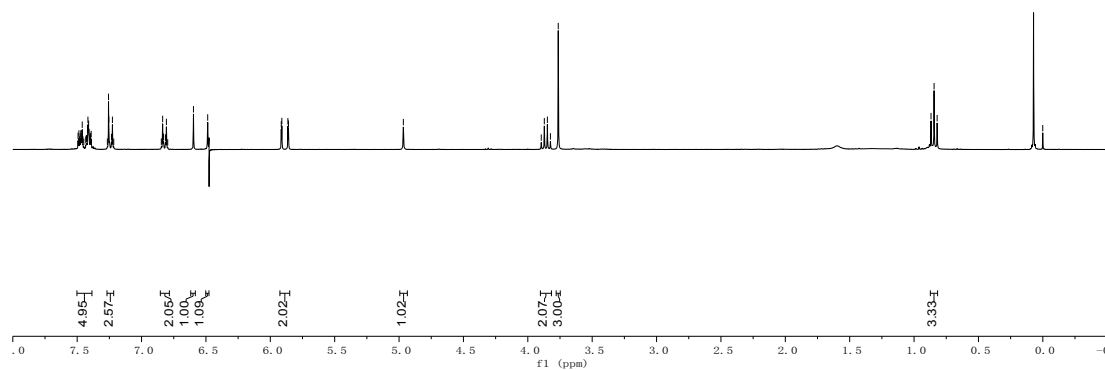

167.18

158.34

158.05

146.79

144.52

144.47

138.50

135.25

129.42

128.79

128.71

127.82

116.97

113.96

107.47

107.07

101.35

98.16

60.13

55.19

41.73

13.51

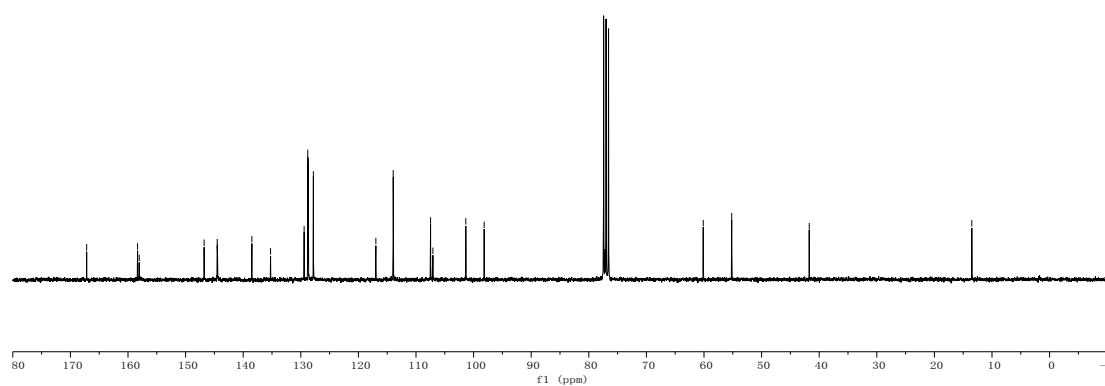

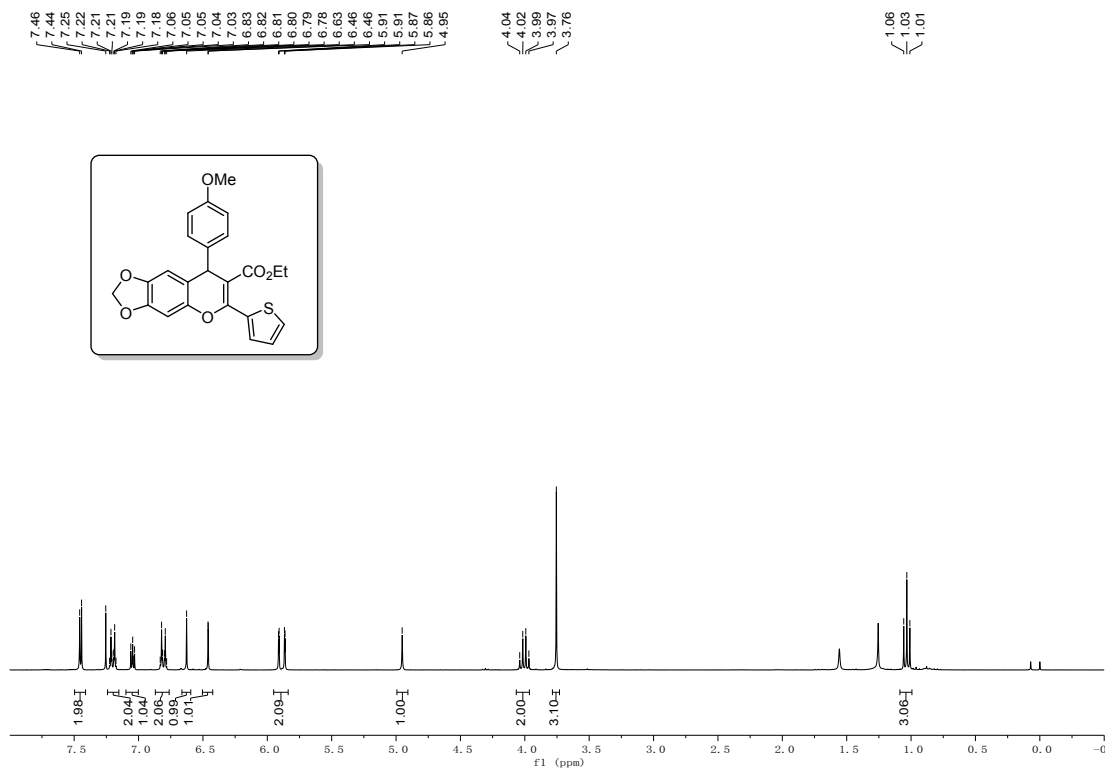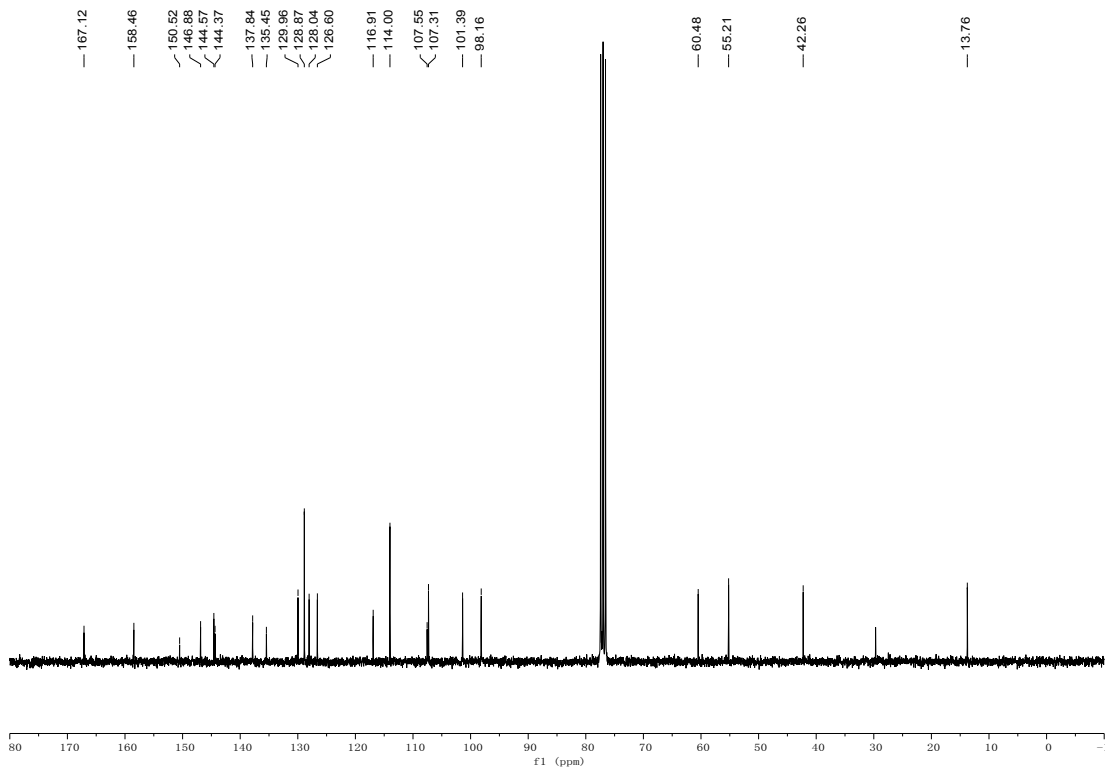

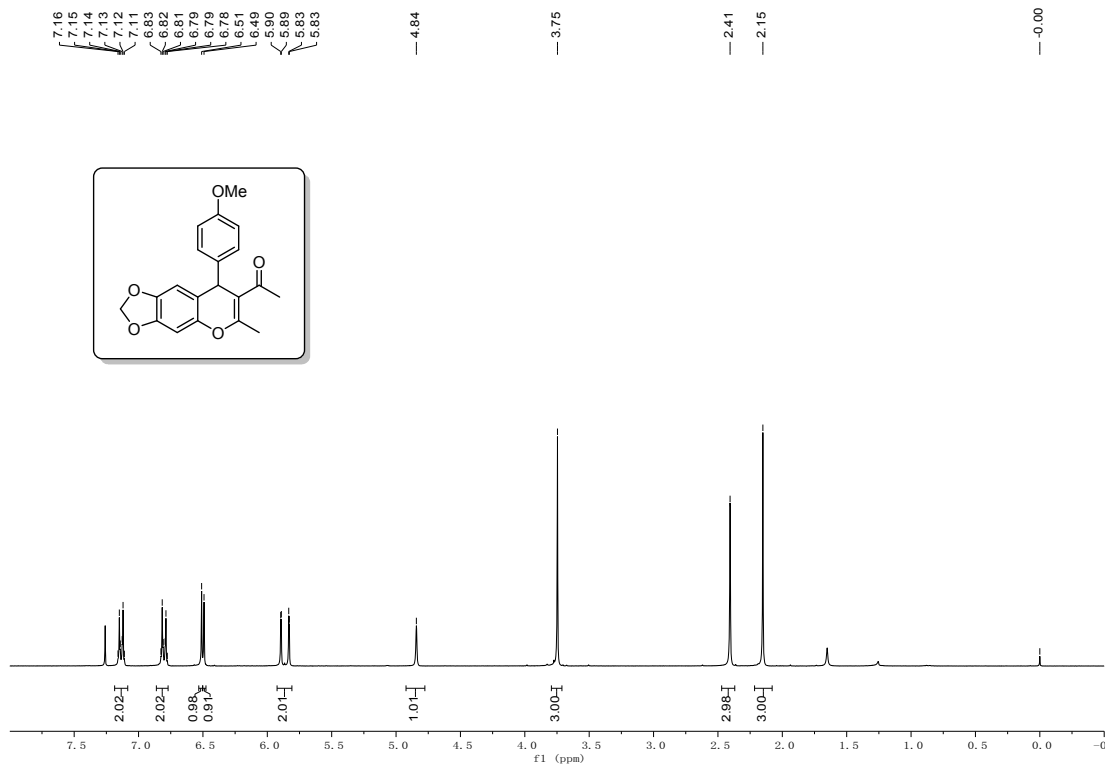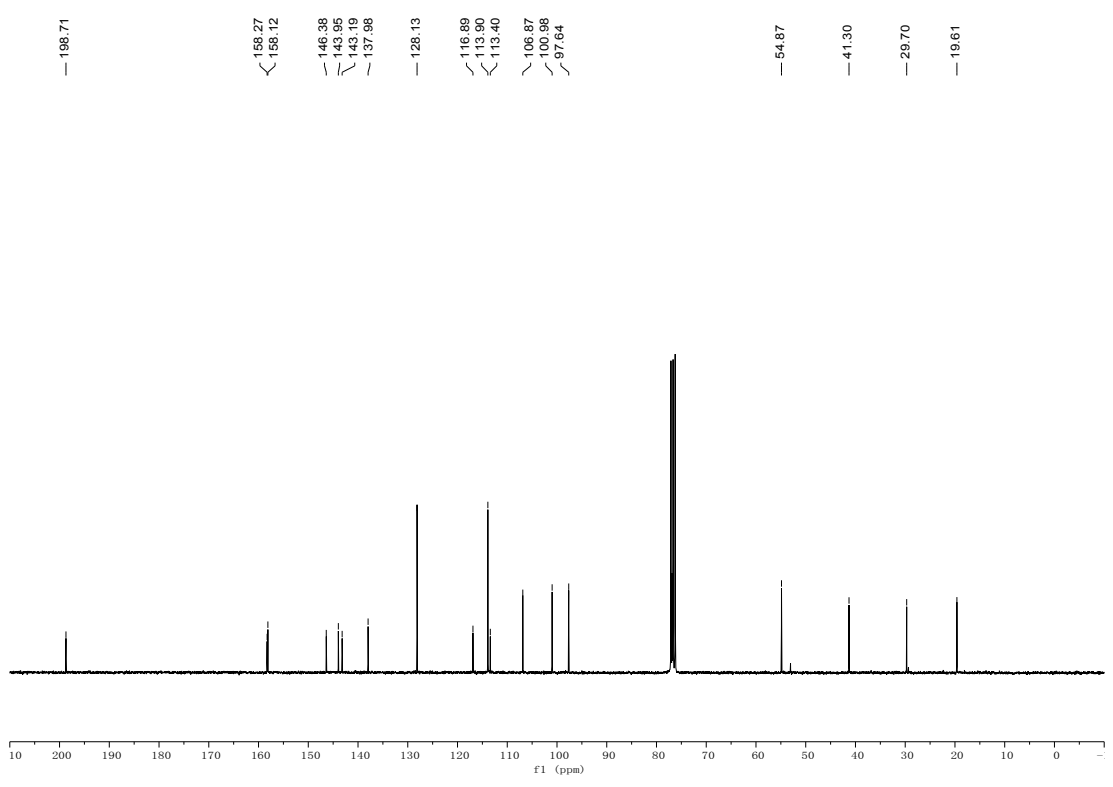

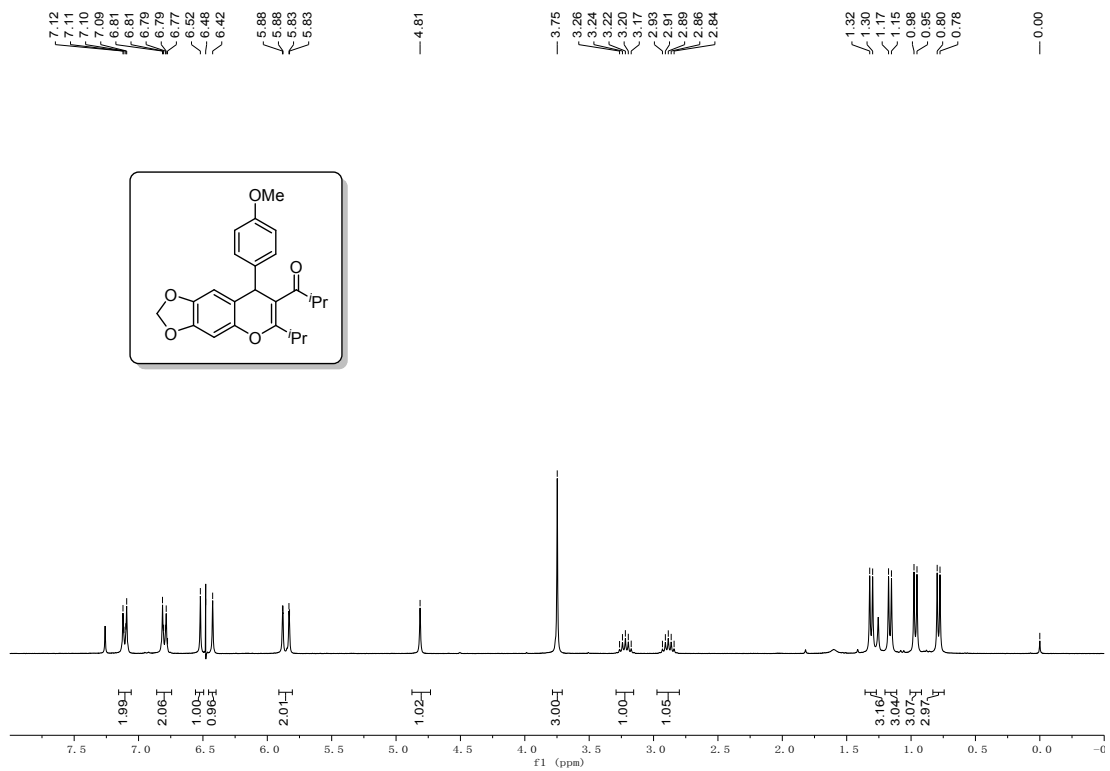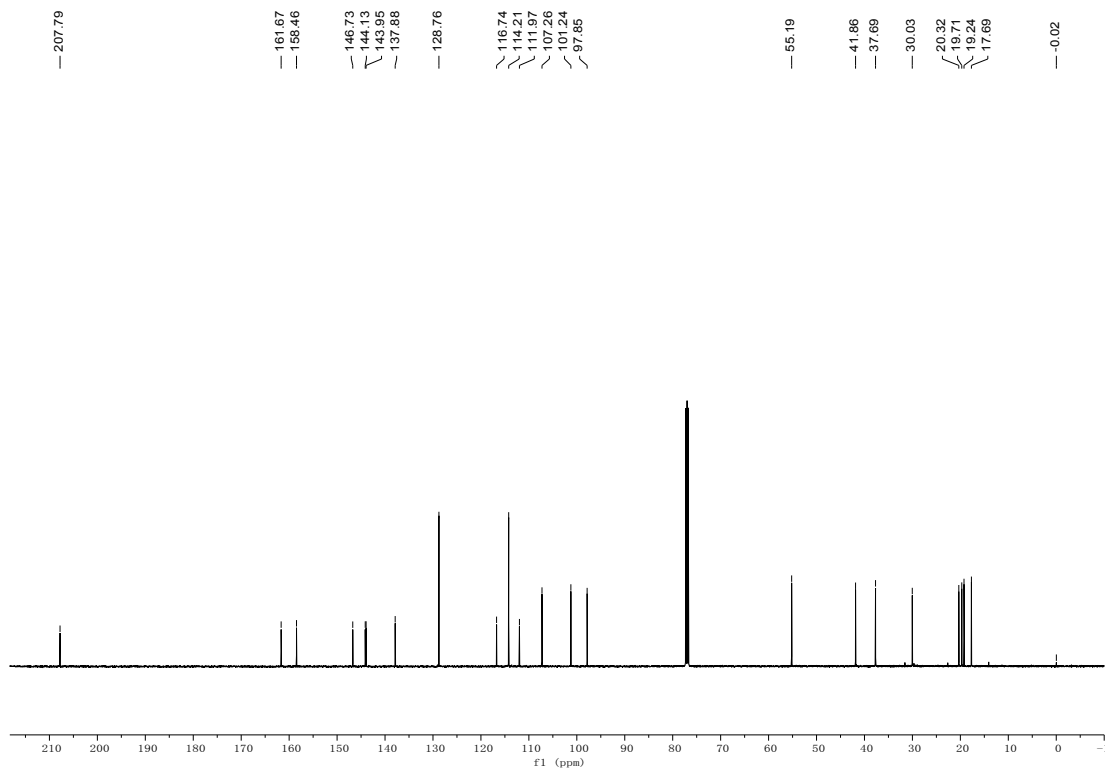

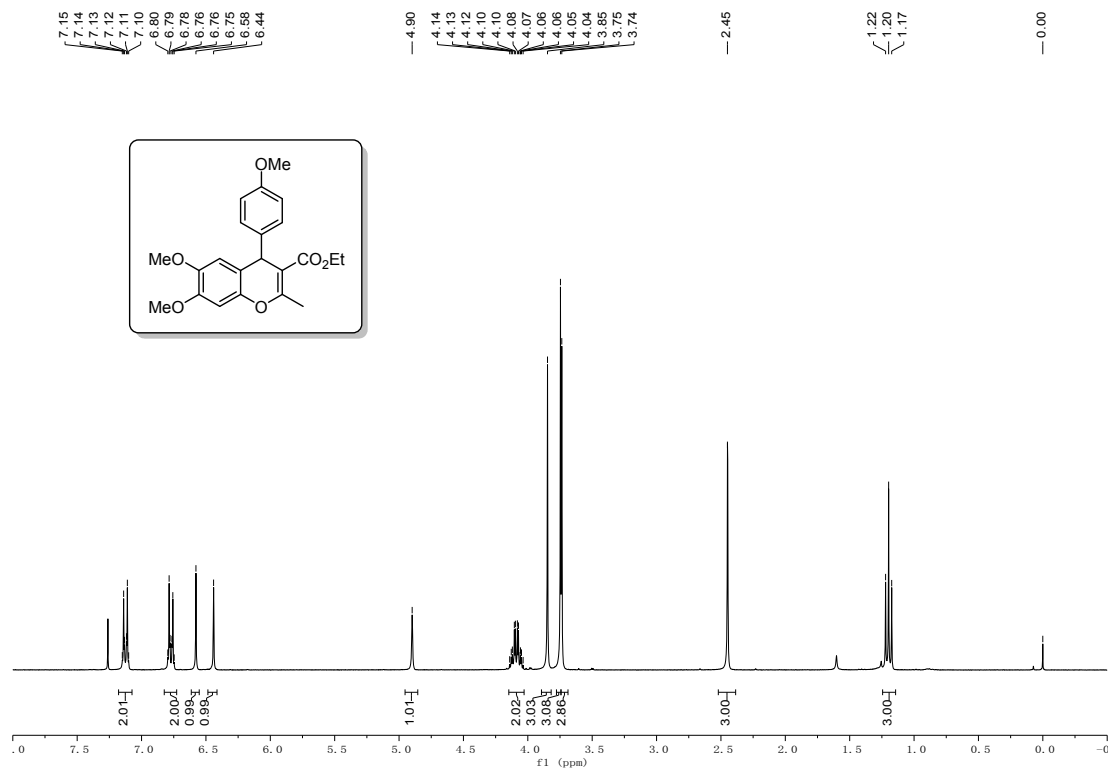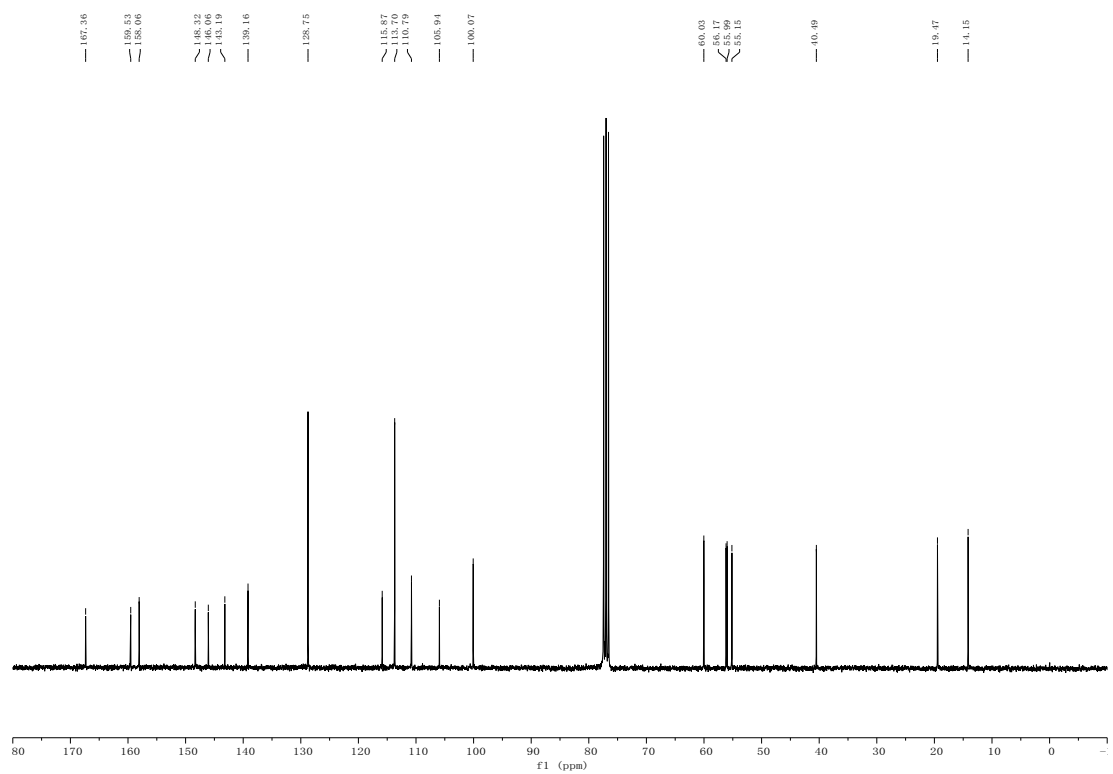



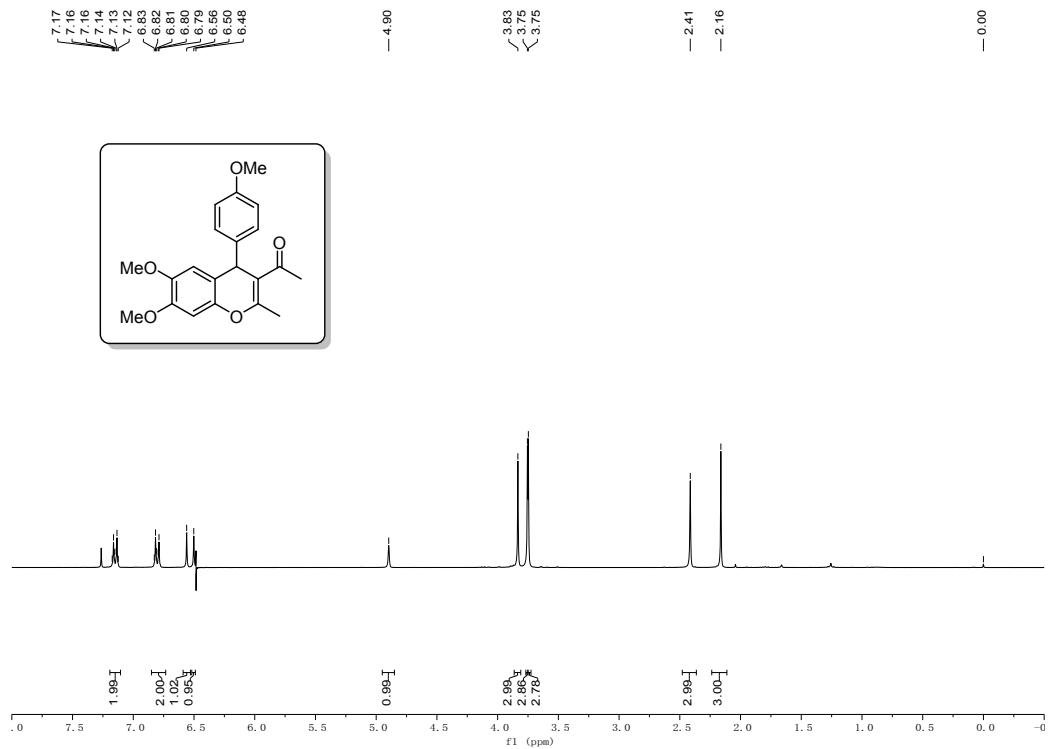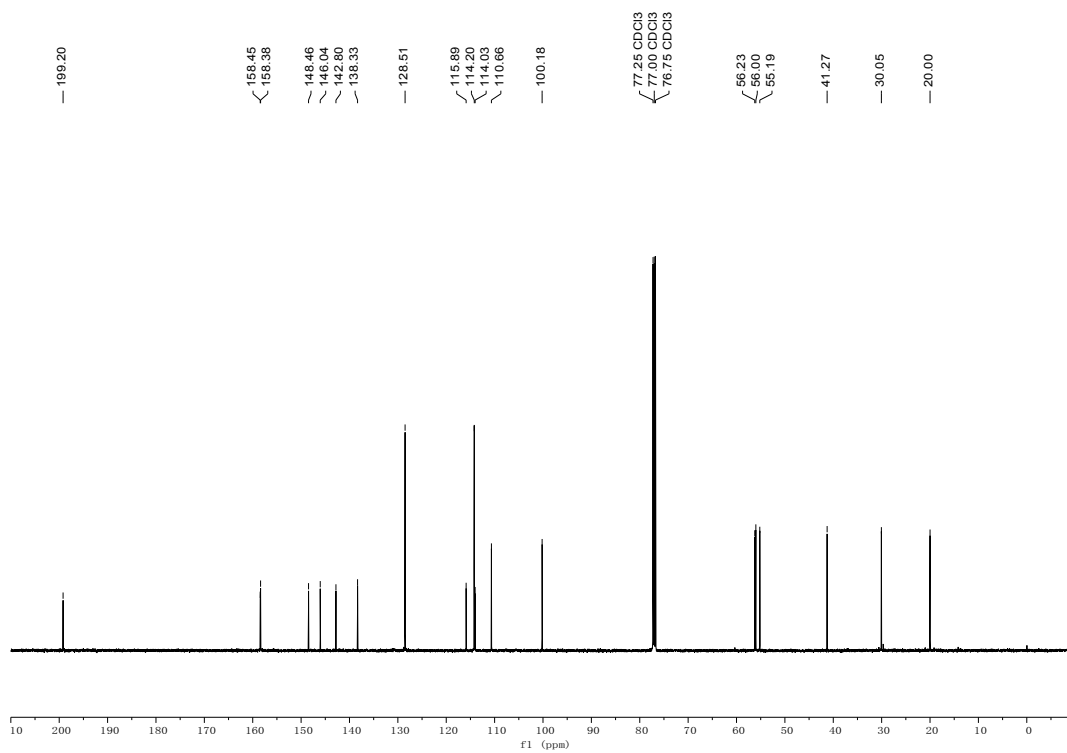

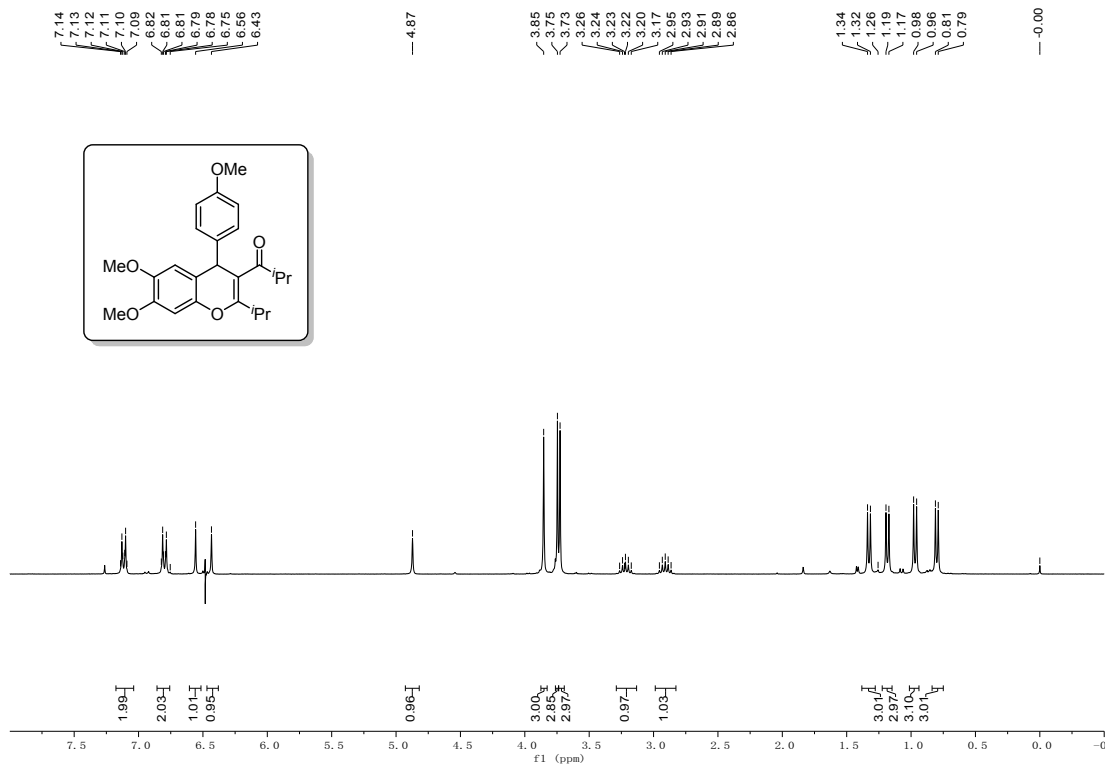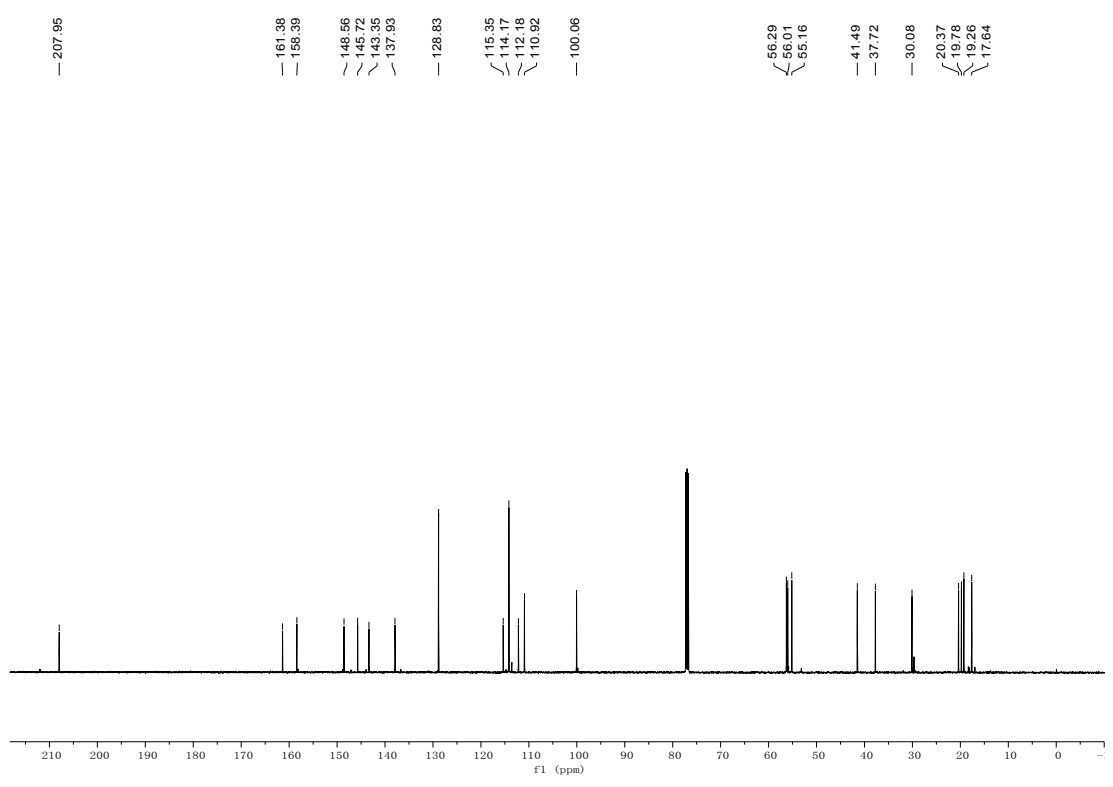

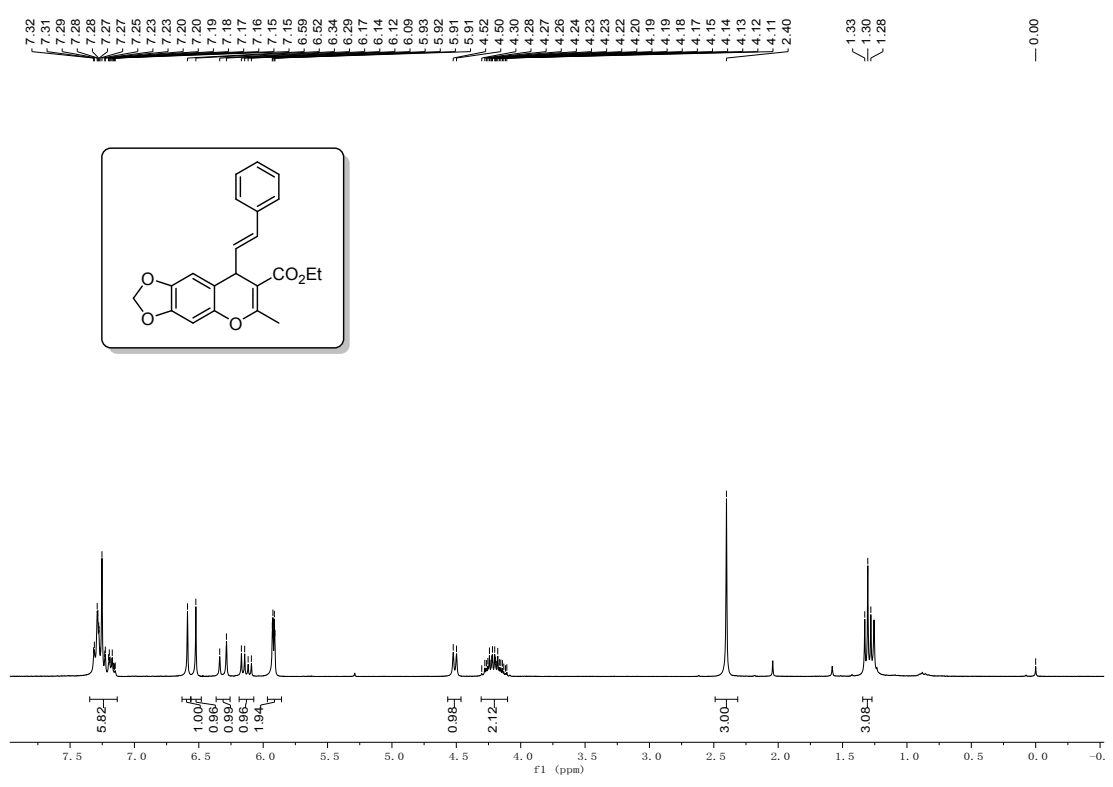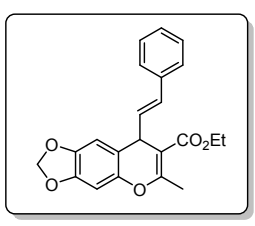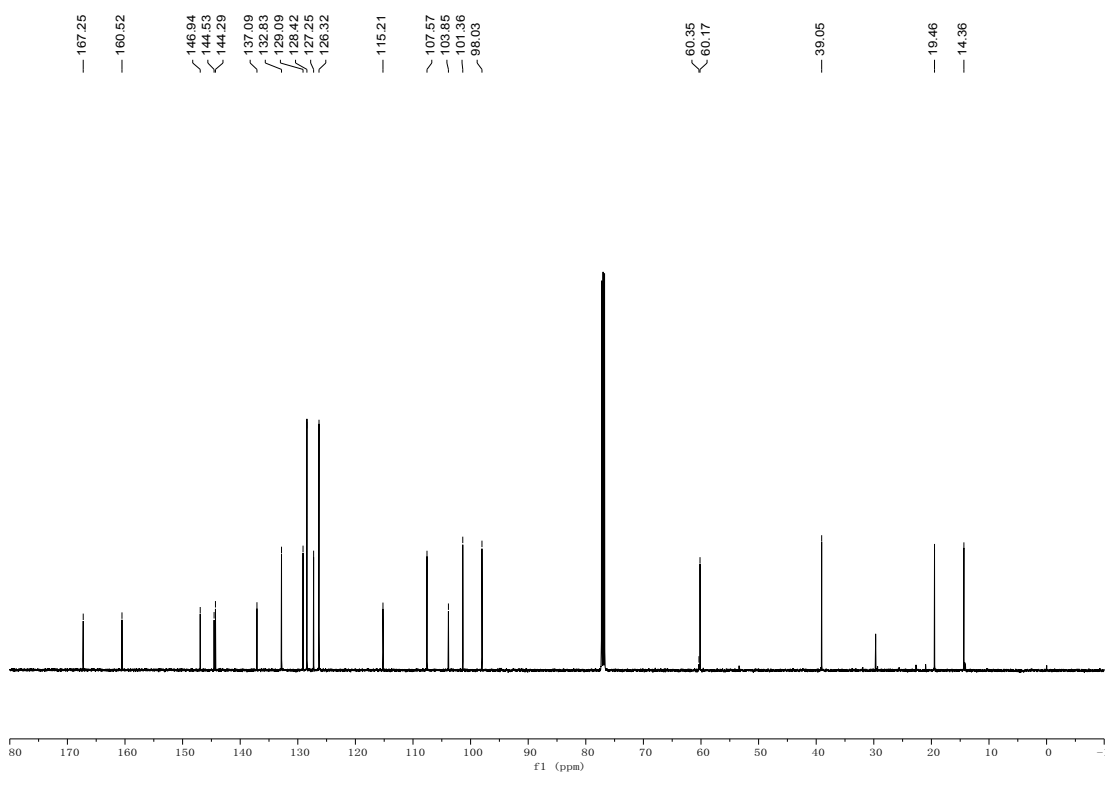

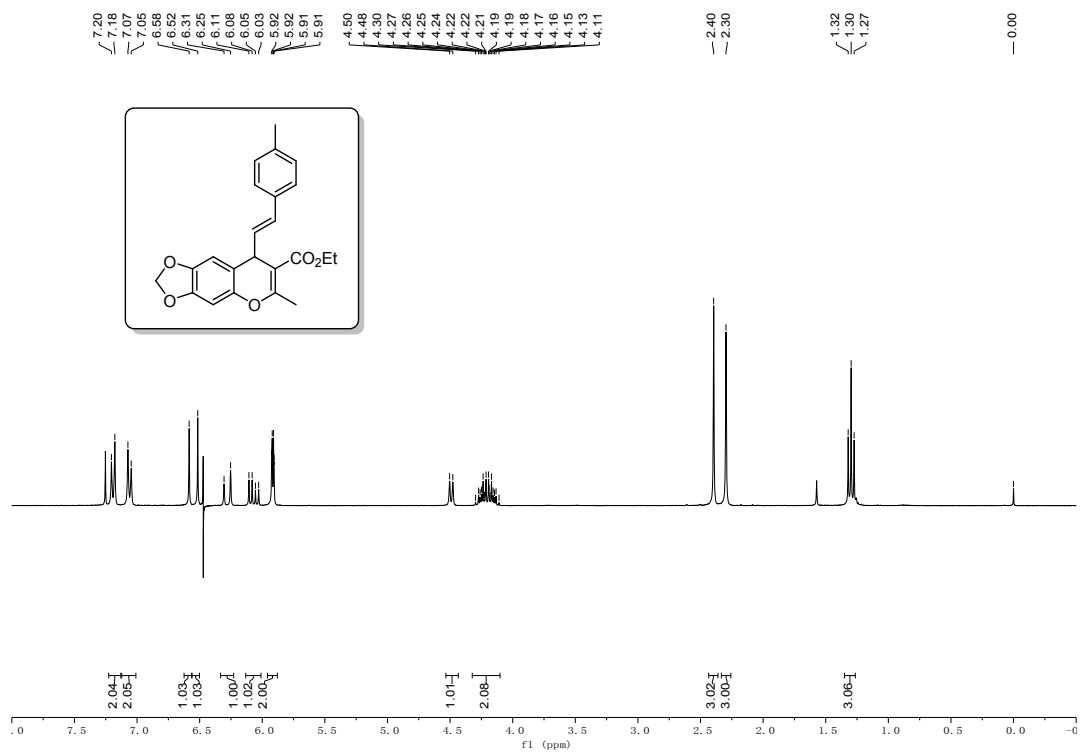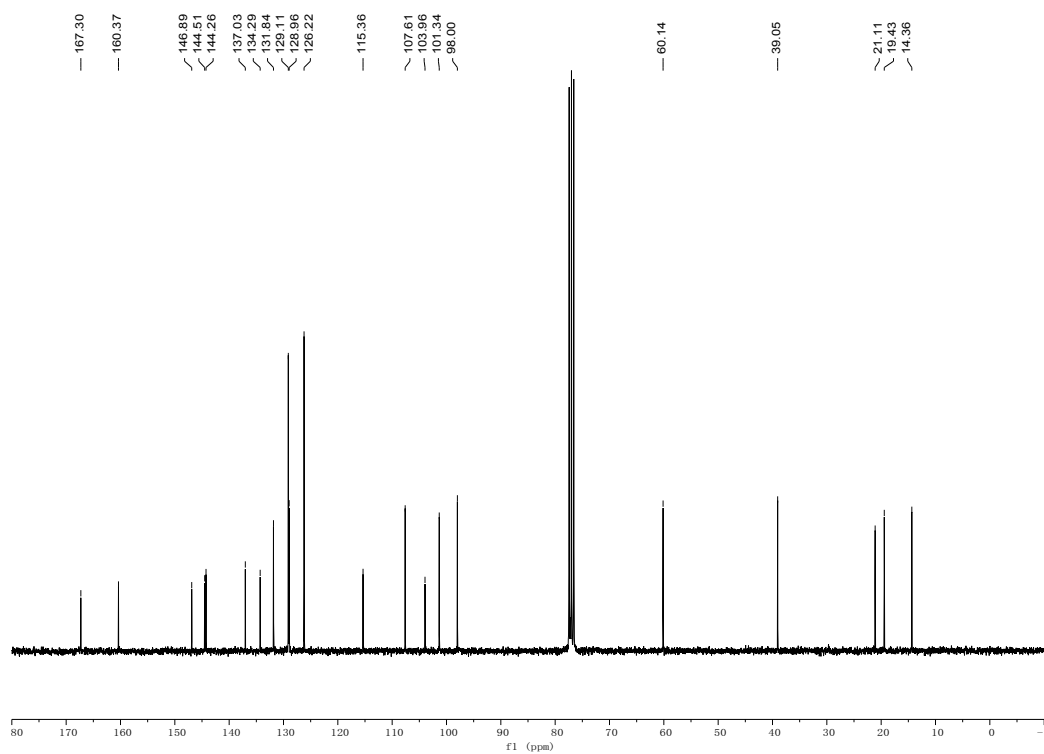

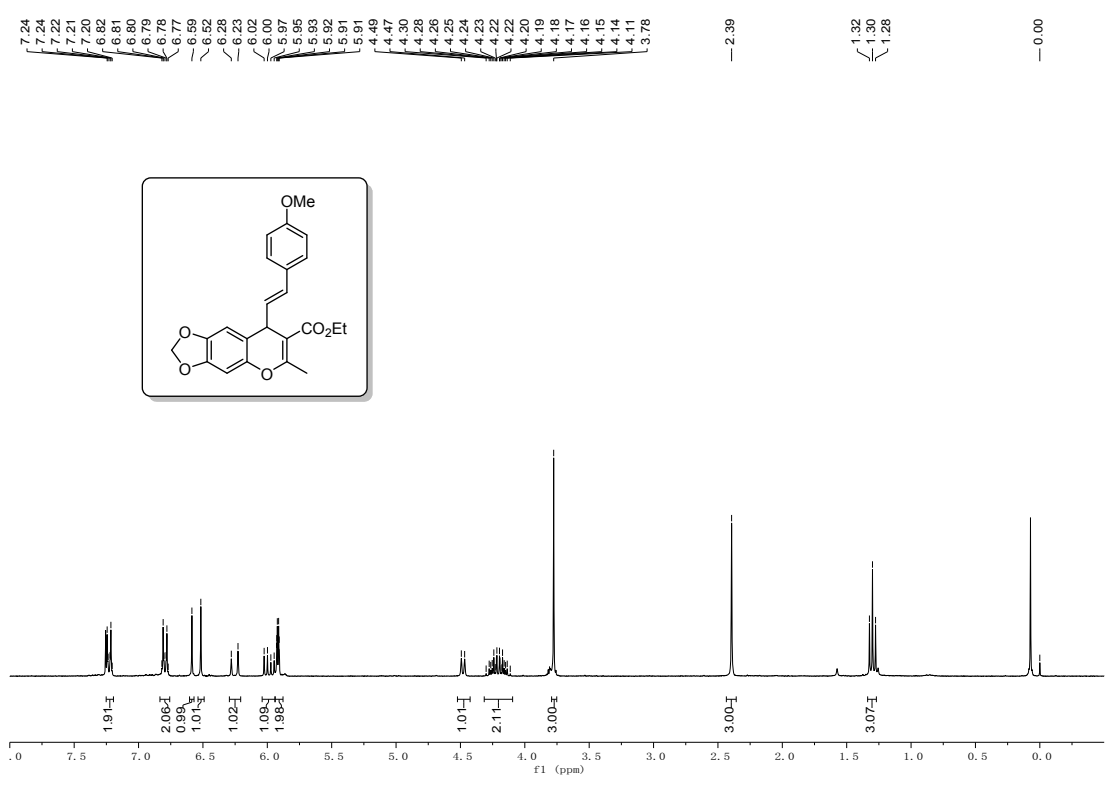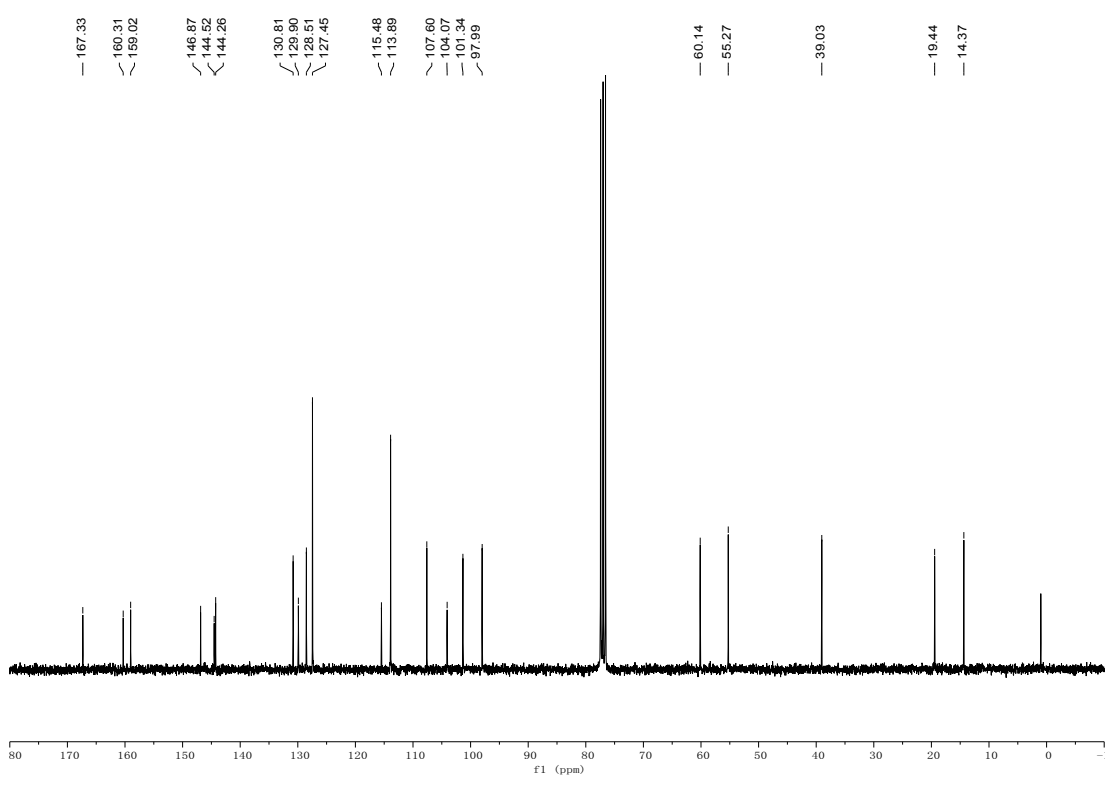

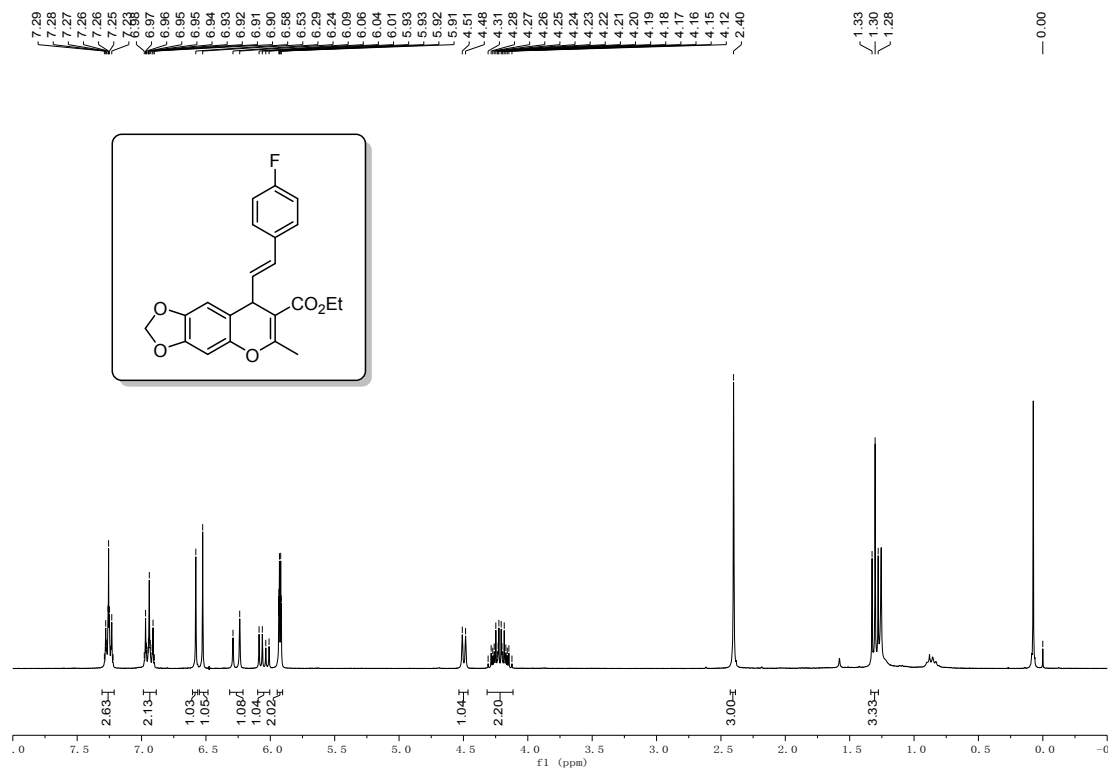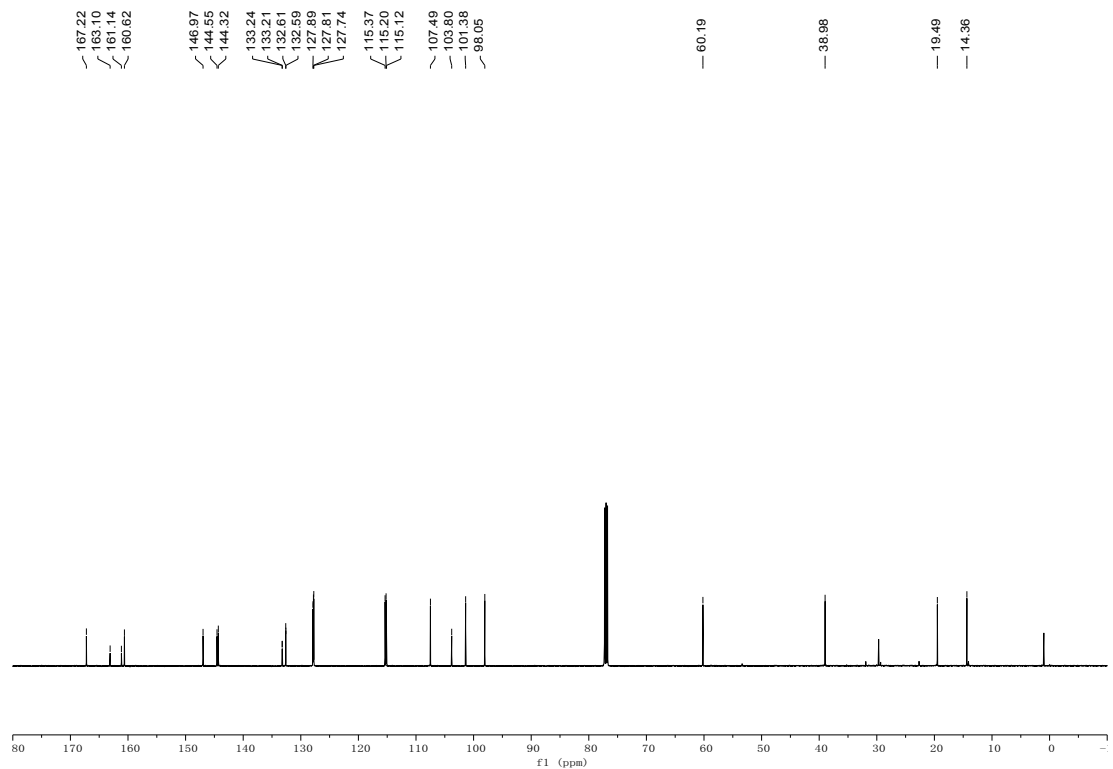

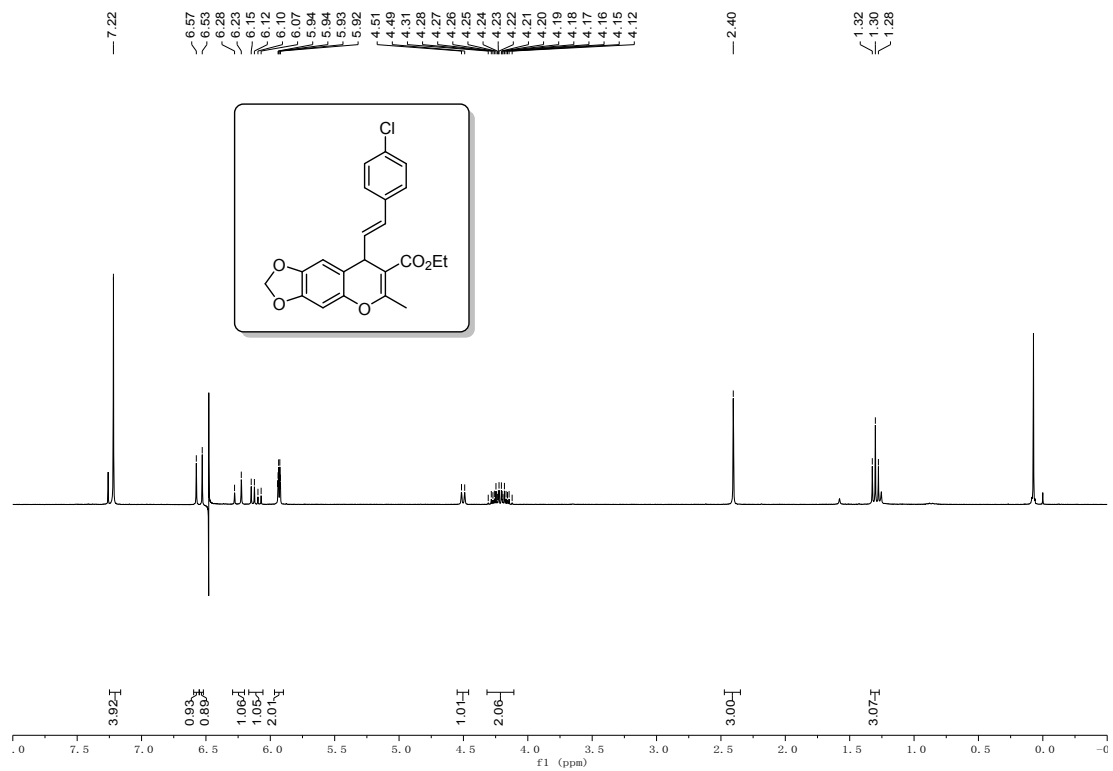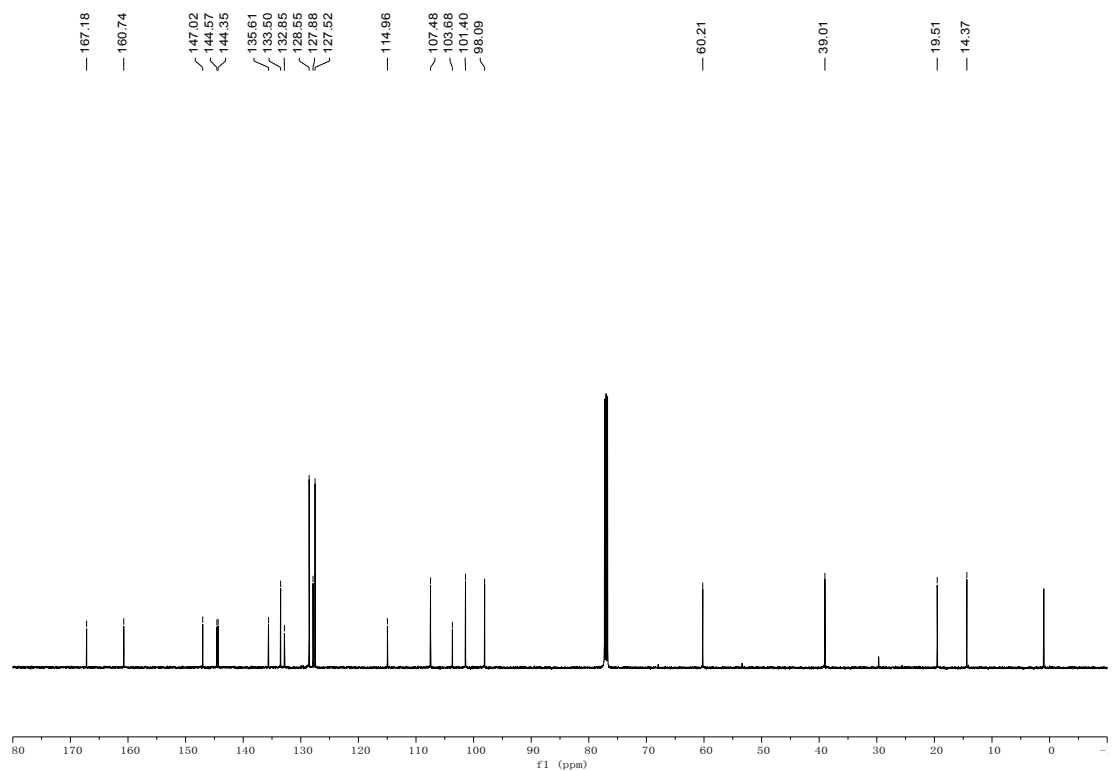

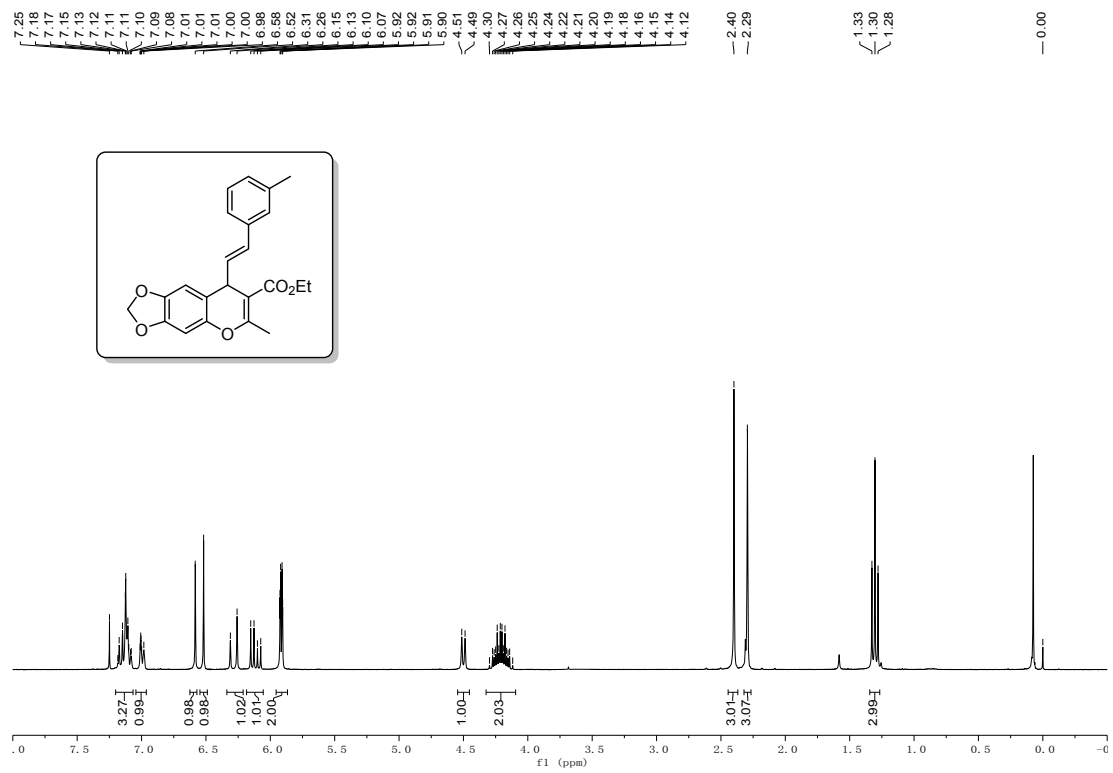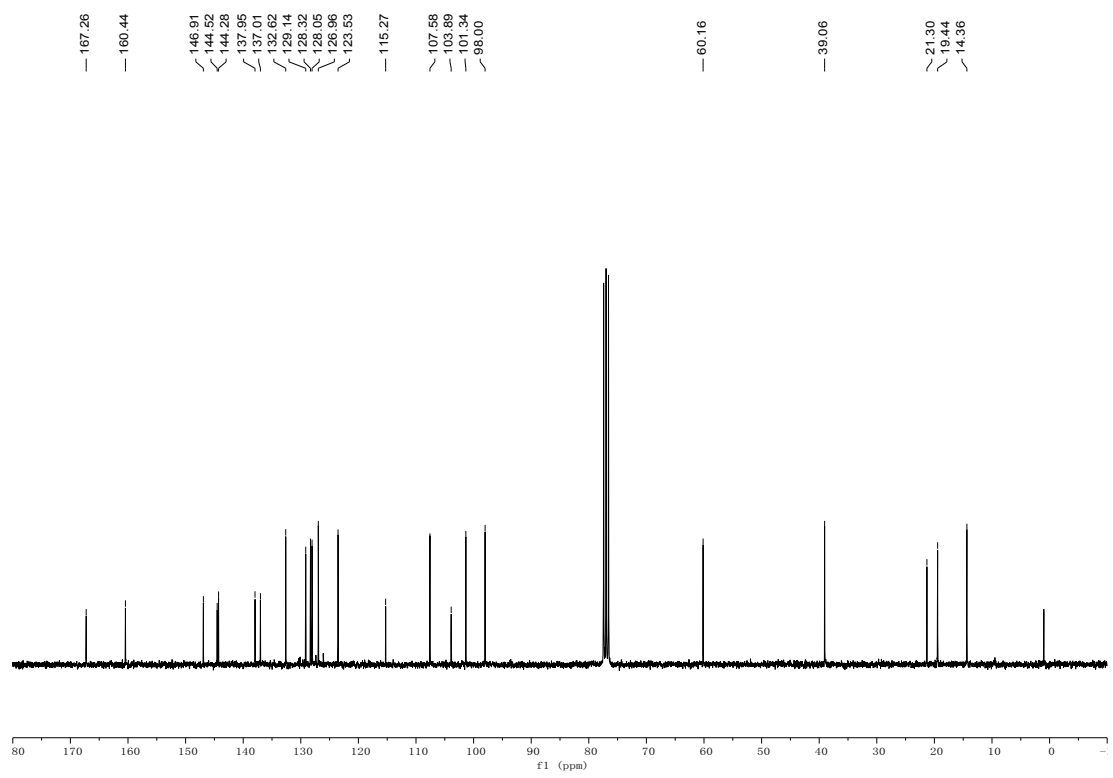



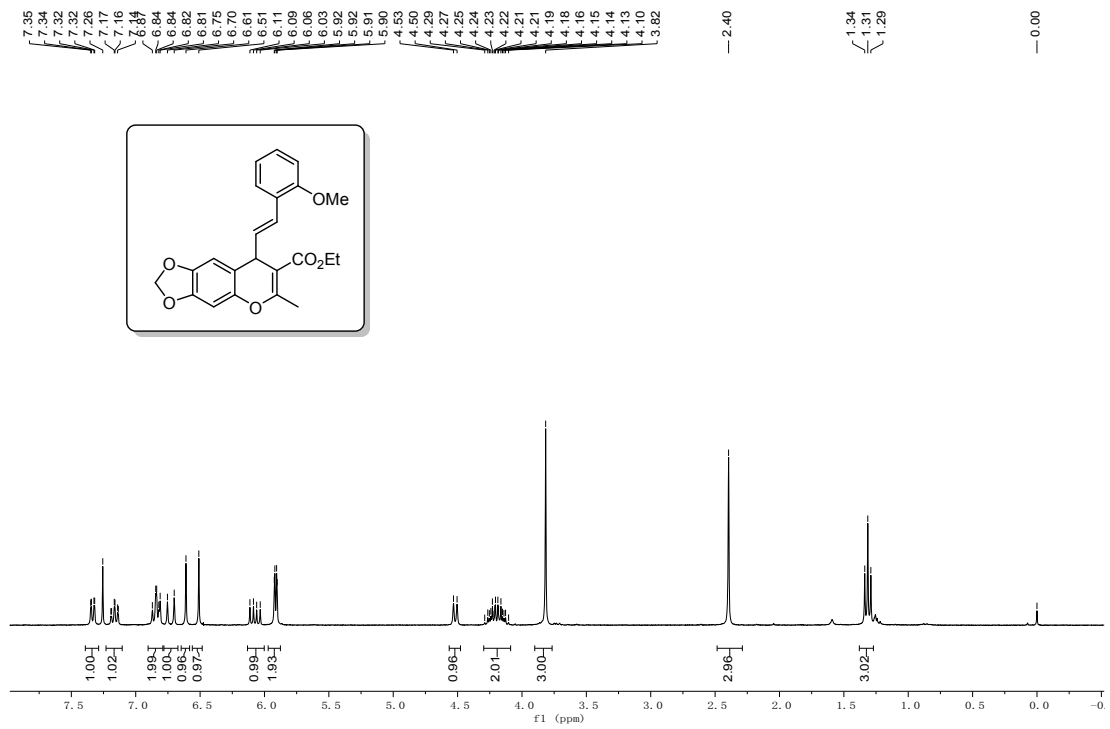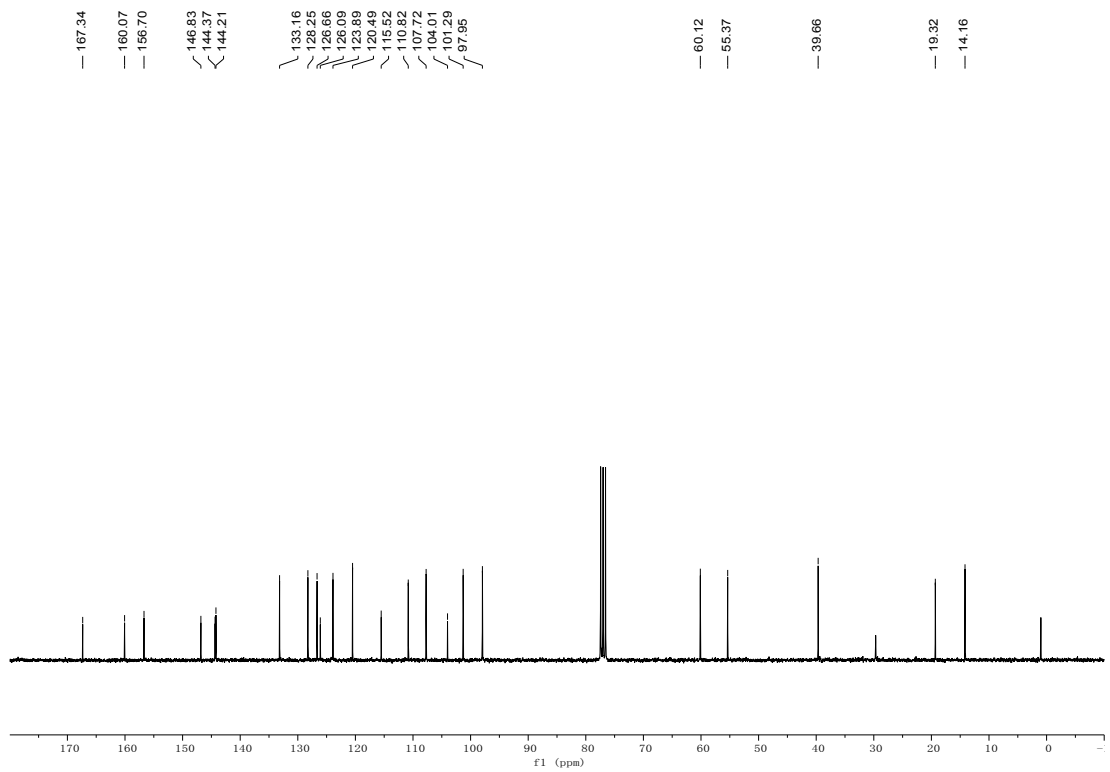

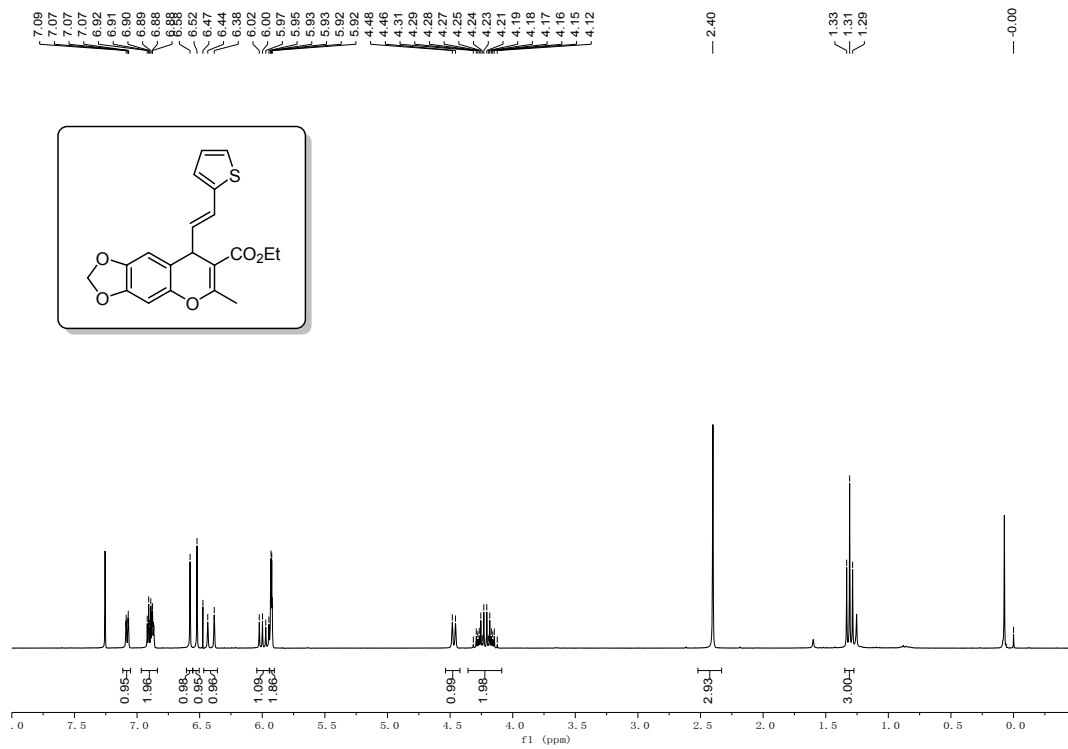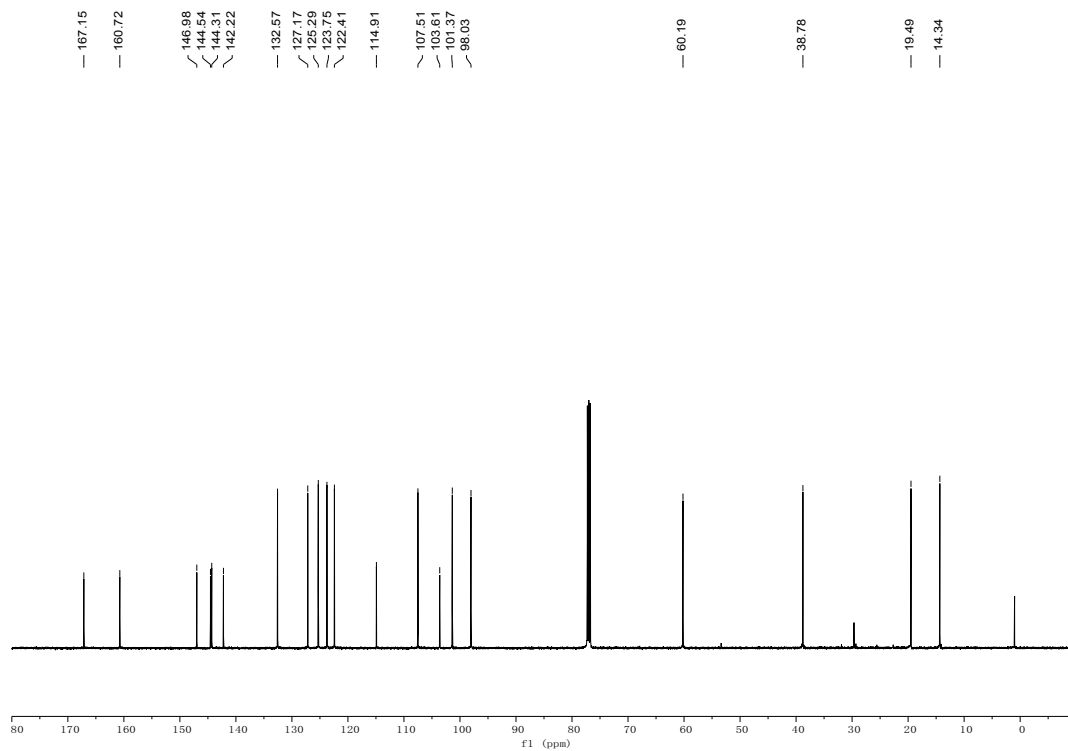

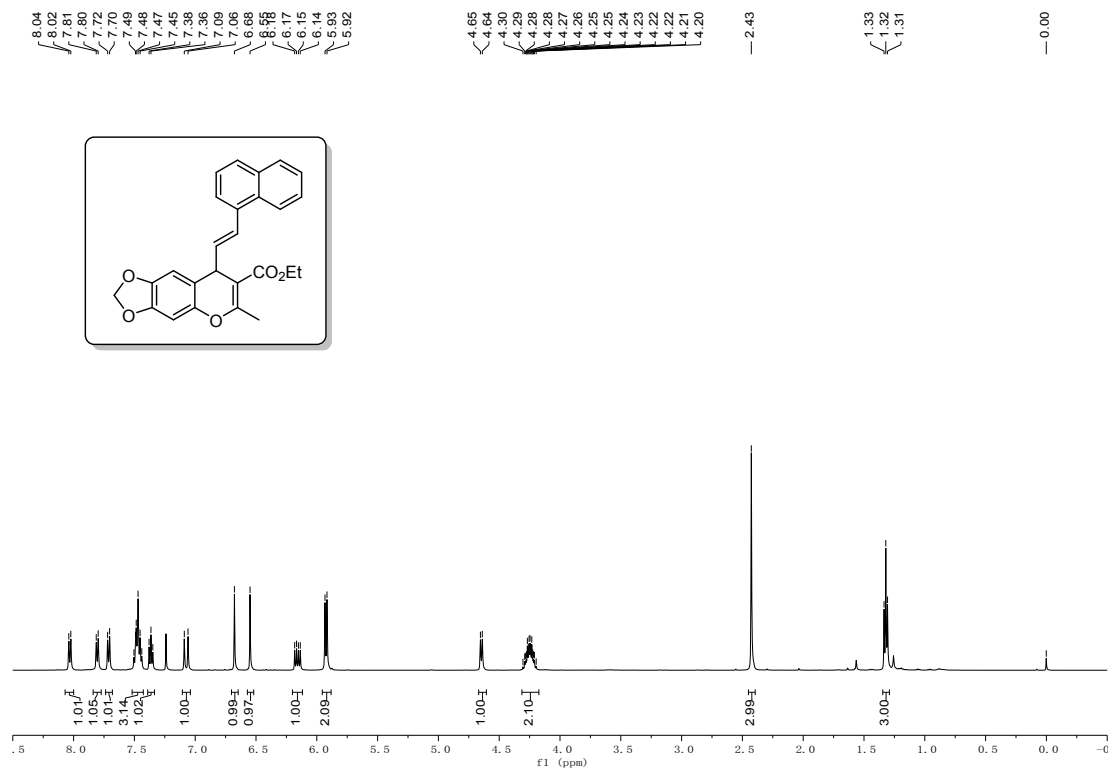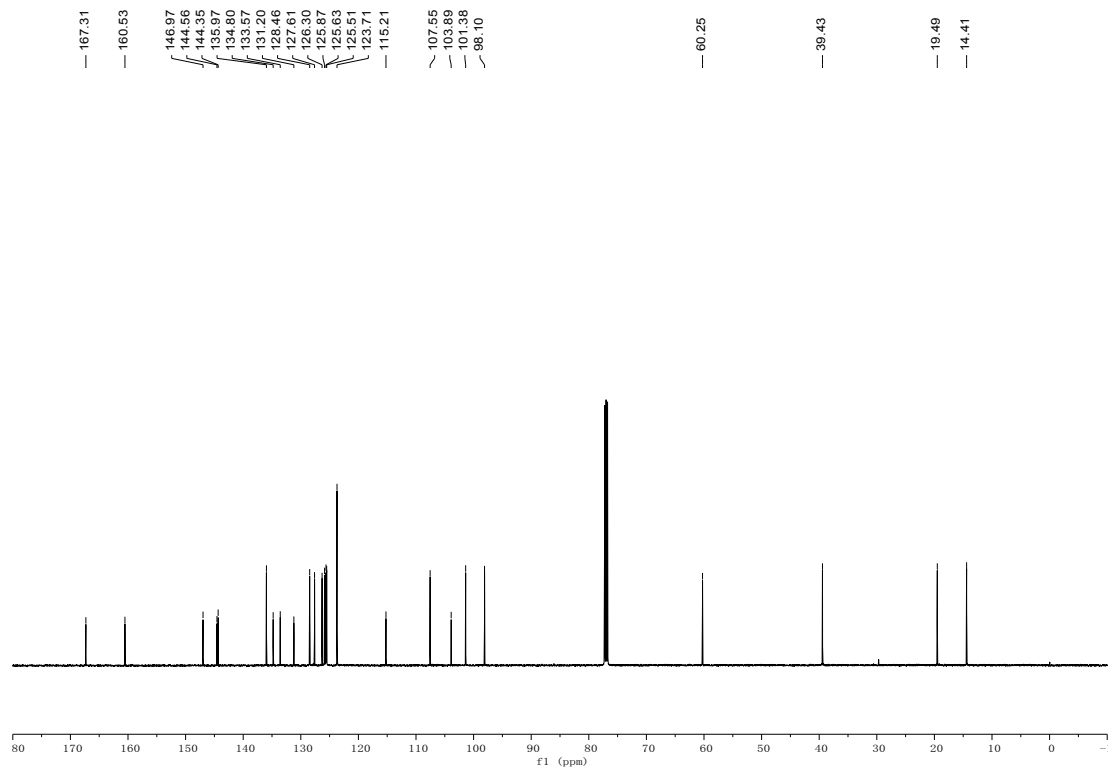

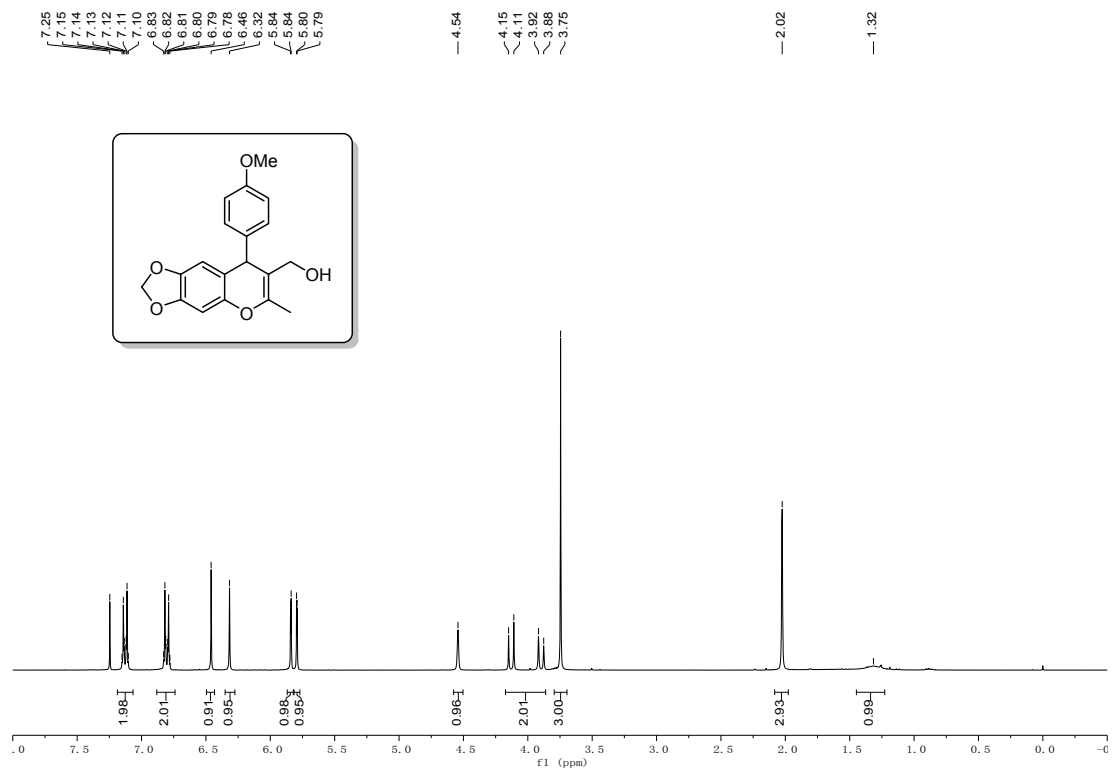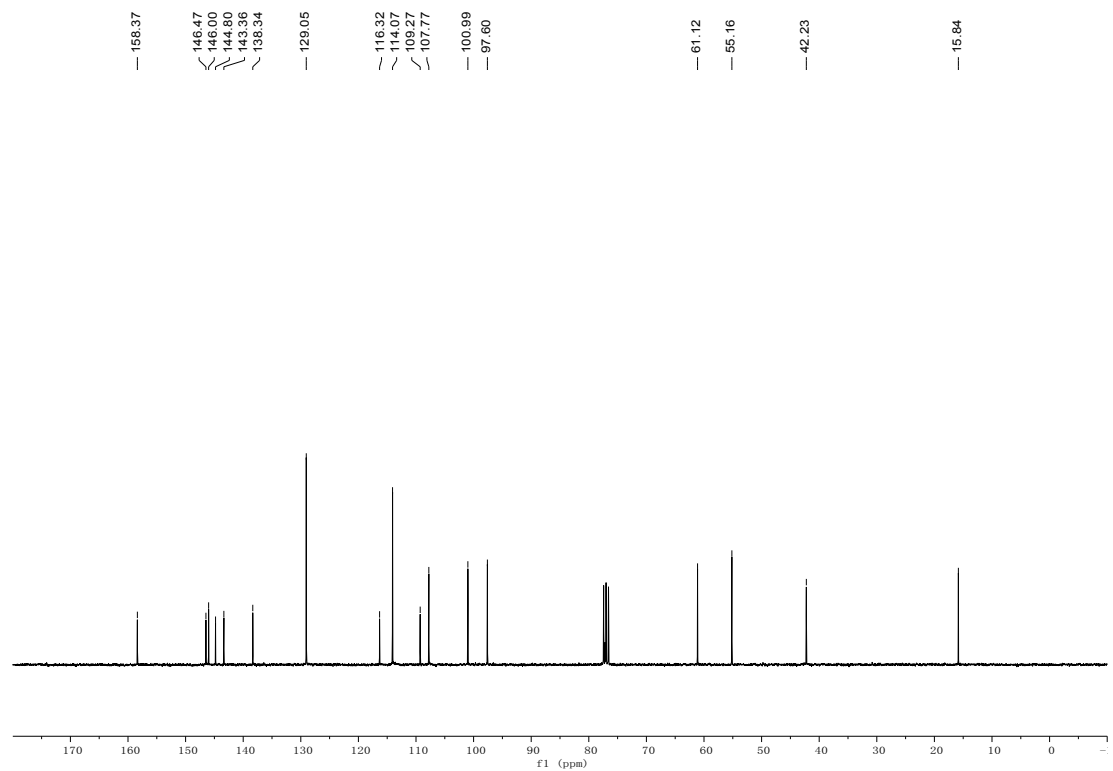

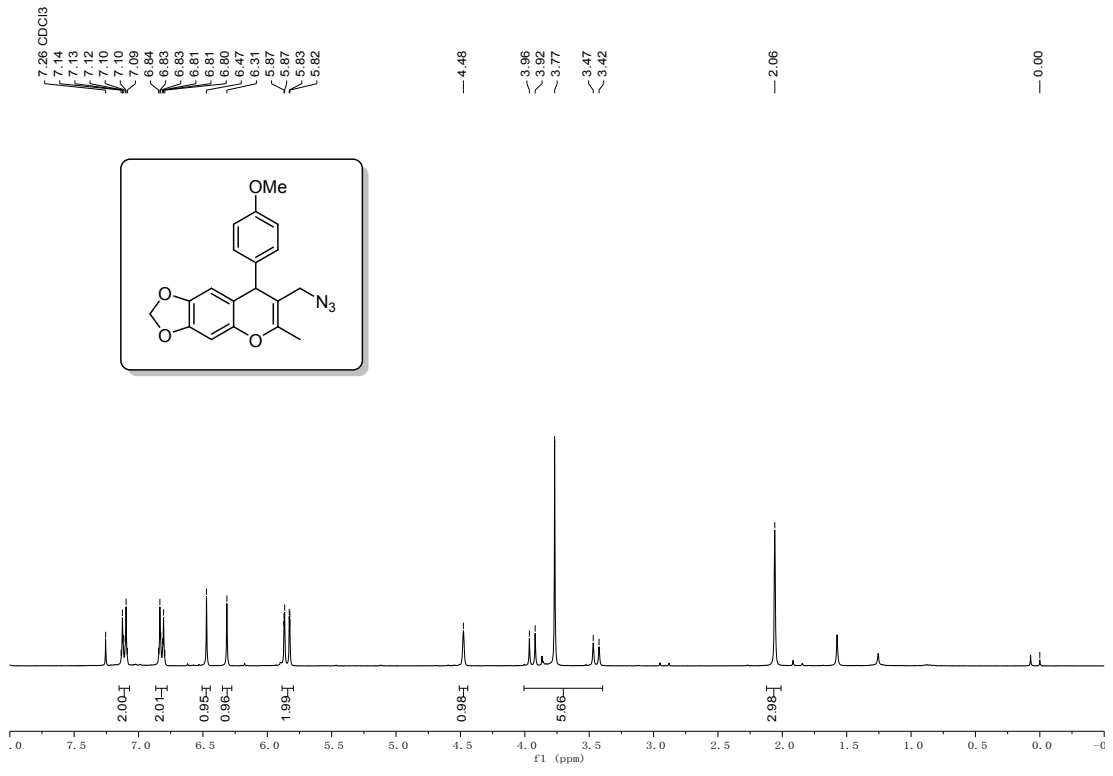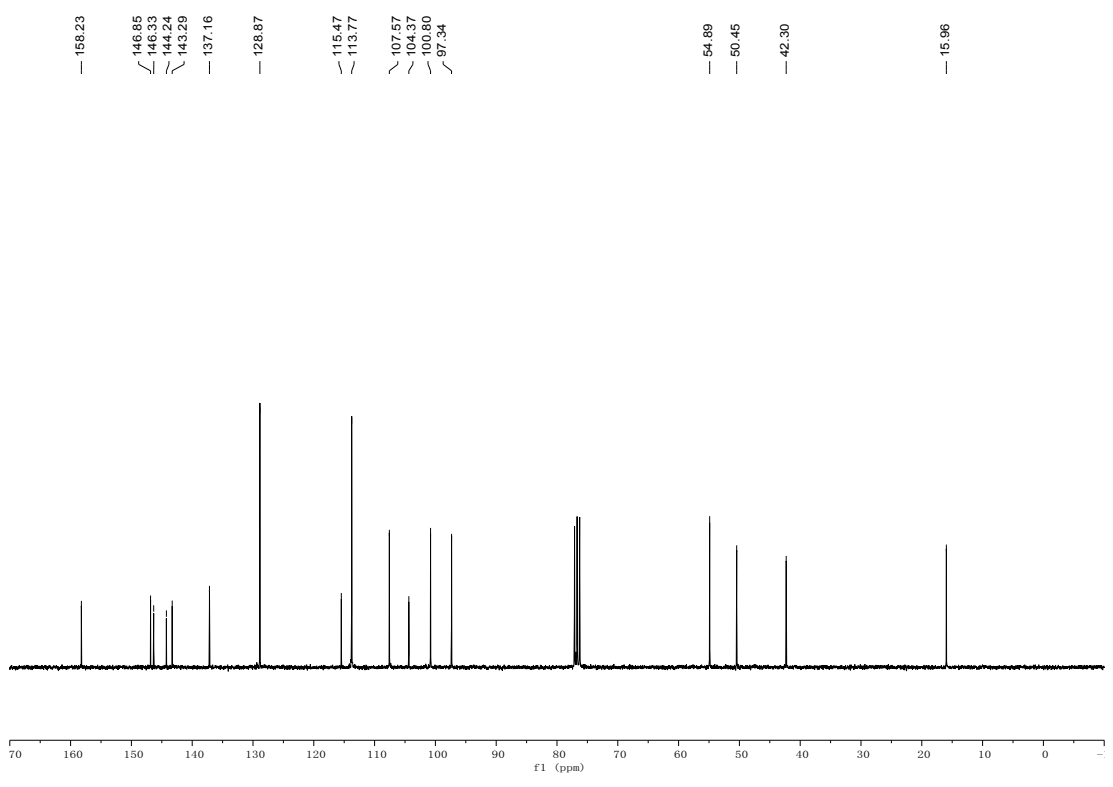

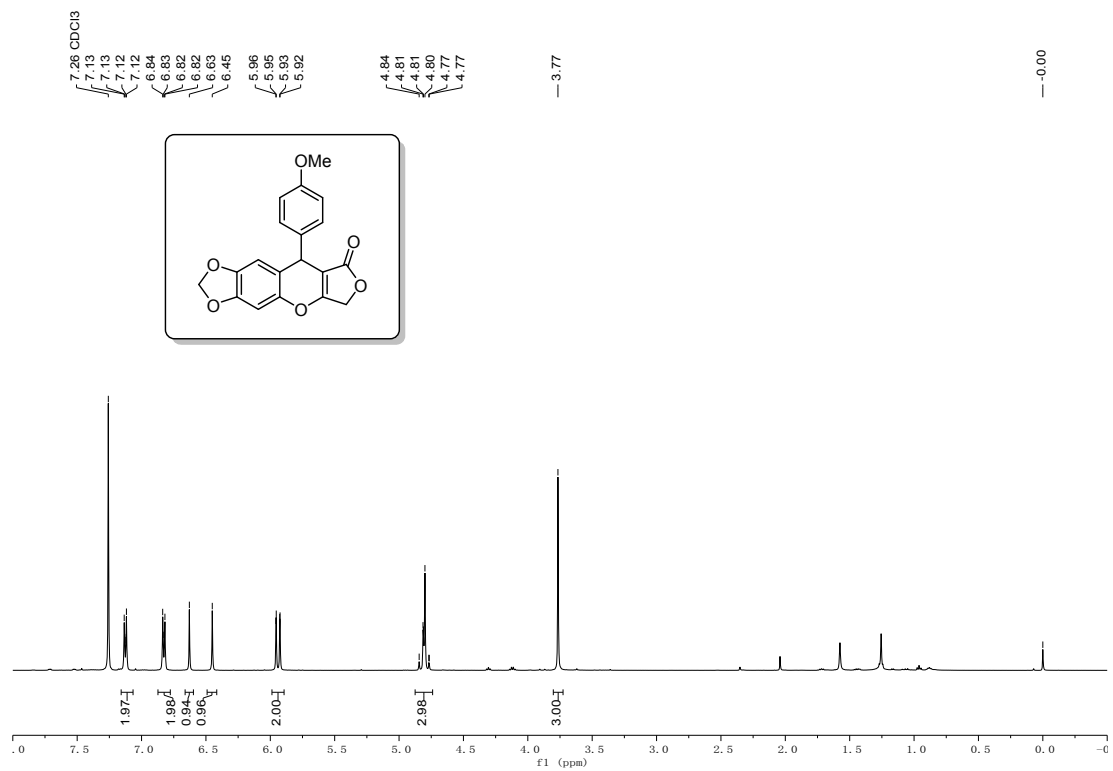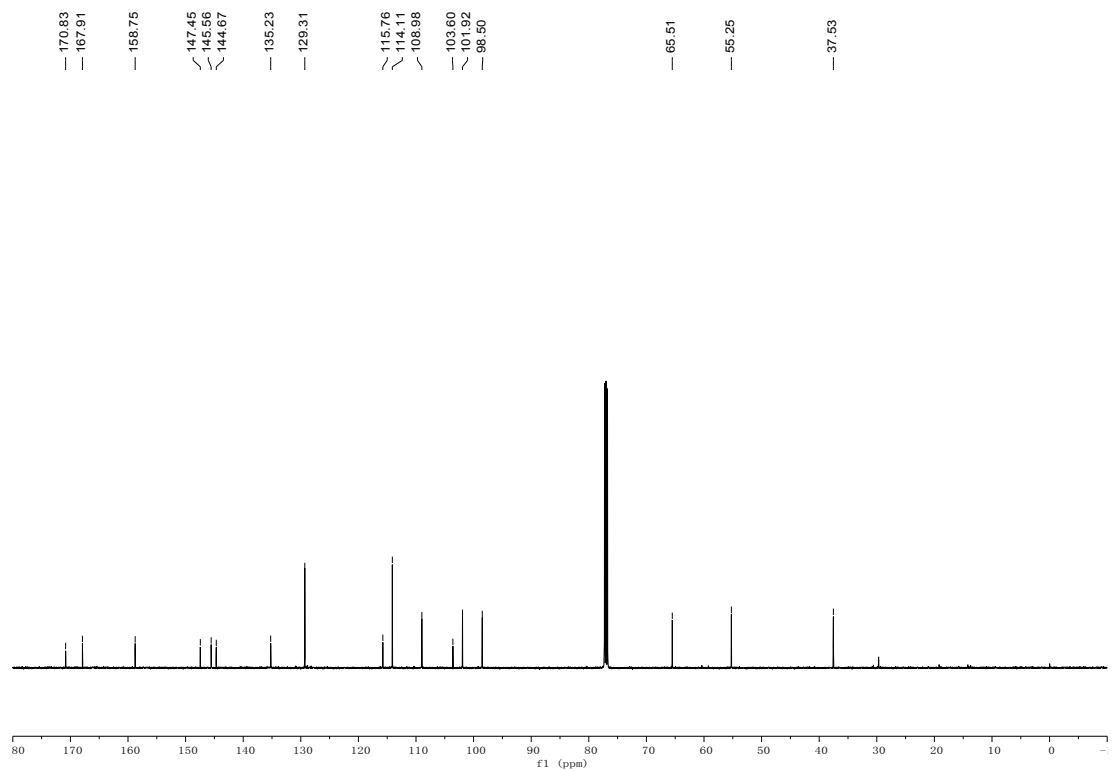

## 6. HPLC Charts of the Products

Daicel Chiralcel OD-H column, *n*-hexane/*i*-PrOH = 95 : 5, 0.5 mL/min, 254 nm; *t* (major) = 13.17 min, *t* (minor) = 12.40 min; 95% ee.

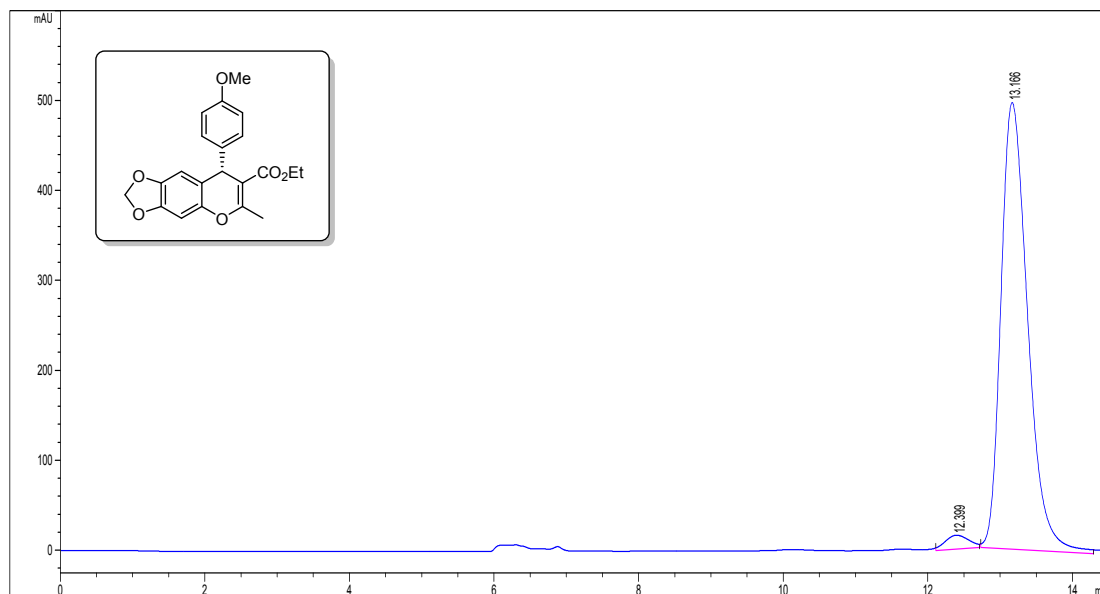

| # | Time   | Width  | Area     | Height   | Area%   |
|---|--------|--------|----------|----------|---------|
| 1 | 12.399 | 0.3820 | 351.1434 | 15.3221  | 2.6849  |
| 2 | 13.166 | 0.4273 | 1.2728e4 | 496.4596 | 97.3151 |

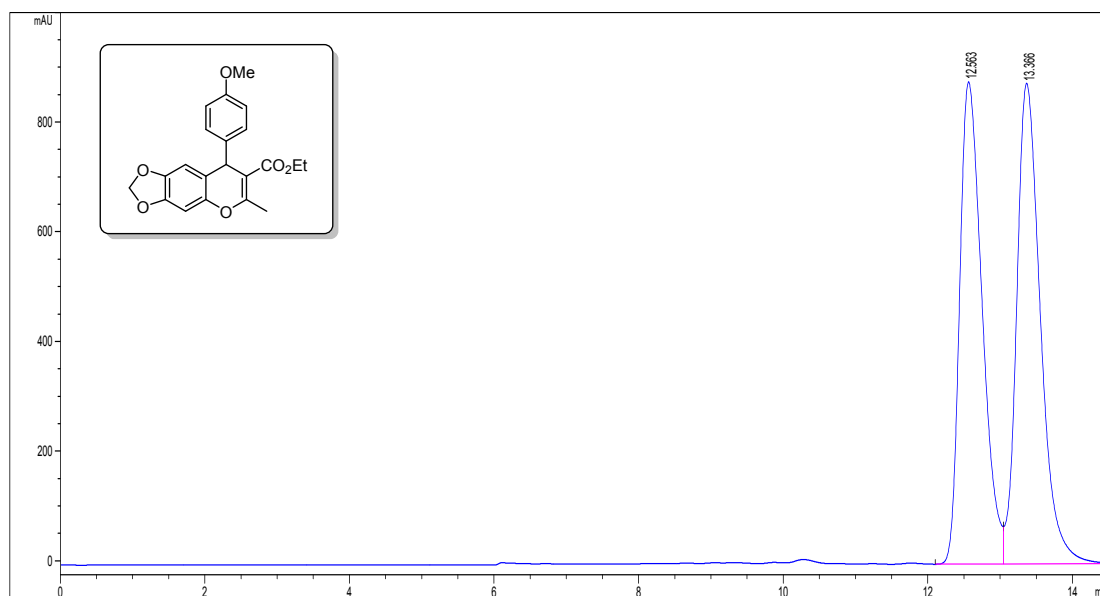

| # | Time   | Width  | Area     | Height   | Area%   |
|---|--------|--------|----------|----------|---------|
| 1 | 12.563 | 0.3361 | 1.8916e4 | 879.0369 | 48.6307 |
| 2 | 13.366 | 0.3511 | 1.9982e4 | 876.1941 | 51.3693 |

Daicel Chiralcel AS-H column, *n*-hexane/*i*-PrOH = 95: 5, 0.5 mL/min, 254 nm; t (major) = 12.00 min, t (minor) = 11.00 min; 91% ee.

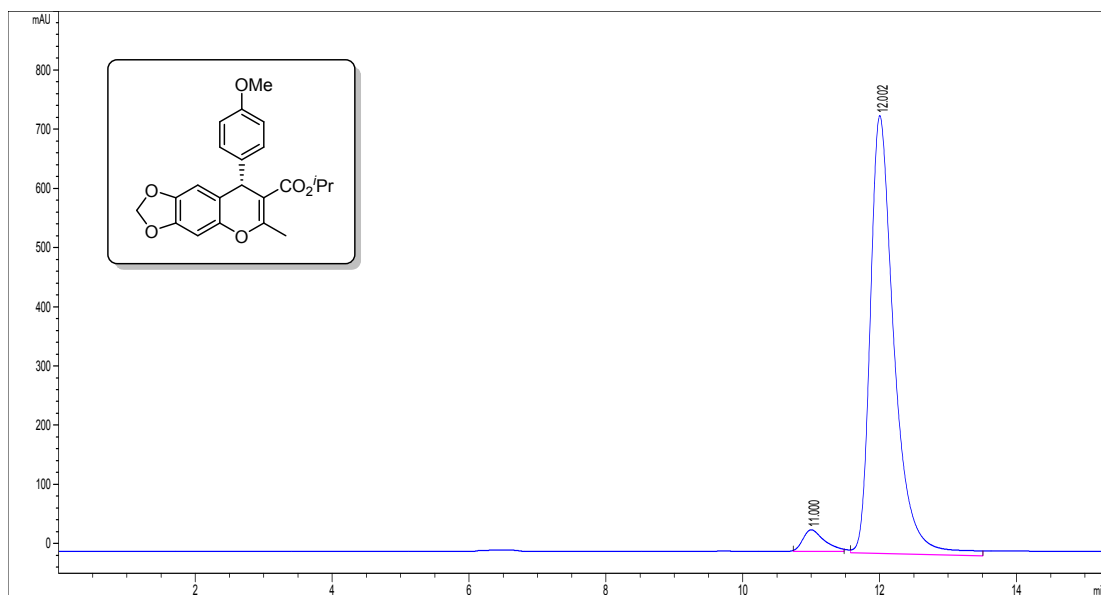

| # | Time   | Width  | Area     | Height   | Area%   |
|---|--------|--------|----------|----------|---------|
| 1 | 11.000 | 0.3628 | 791.7634 | 36.3748  | 4.2421  |
| 2 | 12.002 | 0.4026 | 1.7873e4 | 739.8320 | 95.7579 |

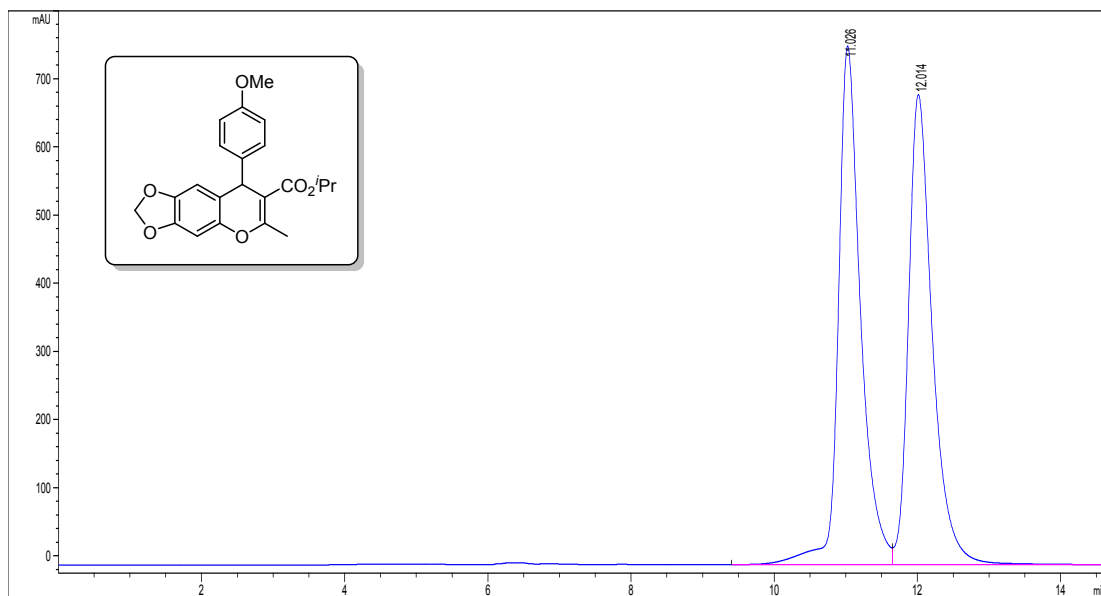

| # | Time   | Width  | Area     | Height   | Area%   |
|---|--------|--------|----------|----------|---------|
| 1 | 11.026 | 0.3214 | 1.6534e4 | 761.1704 | 50.8697 |
| 2 | 12.014 | 0.3471 | 1.5968e4 | 689.7336 | 49.1303 |



Daicel Chiralcel OD-H column, *n*-hexane/*i*-PrOH = 90: 10, 1.0 mL/min, 254 nm; t (major) = 20.09 min, t (minor) = 18.97 min; 90% ee.

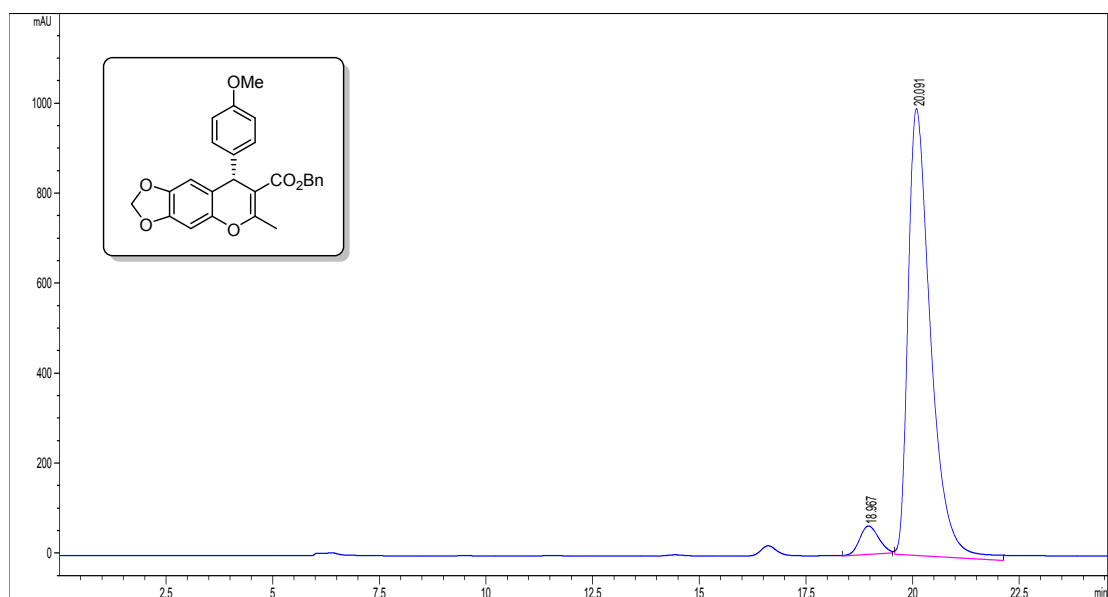

| # | Time   | Width  | Area      | Height   | Area%   |
|---|--------|--------|-----------|----------|---------|
| 1 | 18.967 | 0.5128 | 1940.2200 | 63.0541  | 5.0432  |
| 2 | 20.091 | 0.6127 | 3.6532e4  | 993.7145 | 94.9568 |

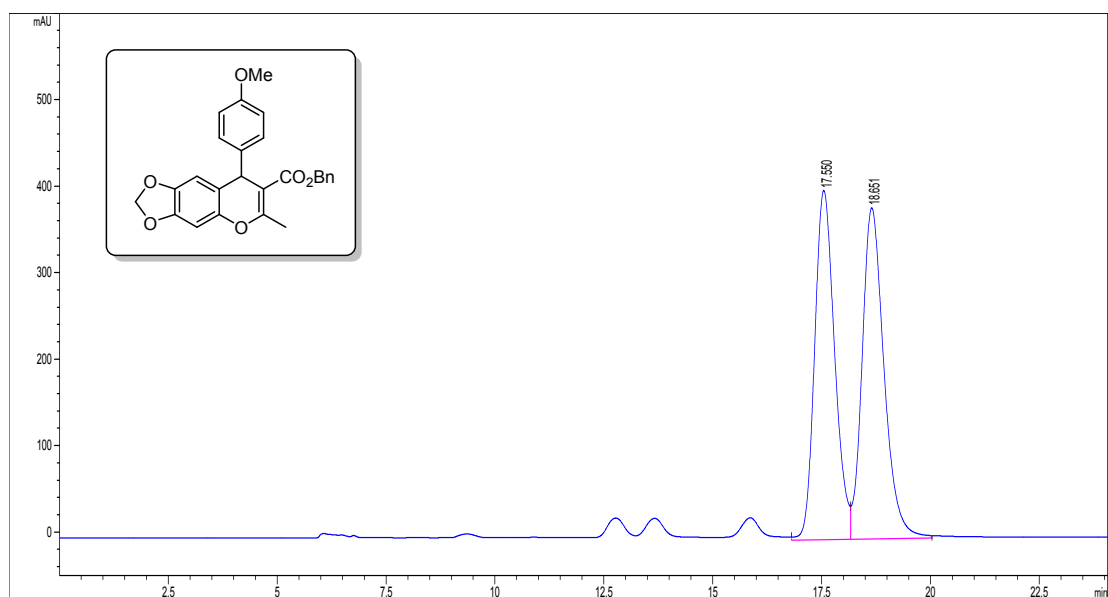

| # | Time   | Width  | Area     | Height   | Area%   |
|---|--------|--------|----------|----------|---------|
| 1 | 17.550 | 0.5309 | 1.2858e4 | 403.7023 | 49.0652 |
| 2 | 18.651 | 0.5814 | 1.3348e4 | 382.6419 | 50.9348 |

Daicel Chiralcel OD-H column, *n*-hexane/*i*-PrOH = 90: 10, 1.0 mL/min, 254 nm; t (major) = 11.70 min, t (minor) = 10.68 min; 93% ee.

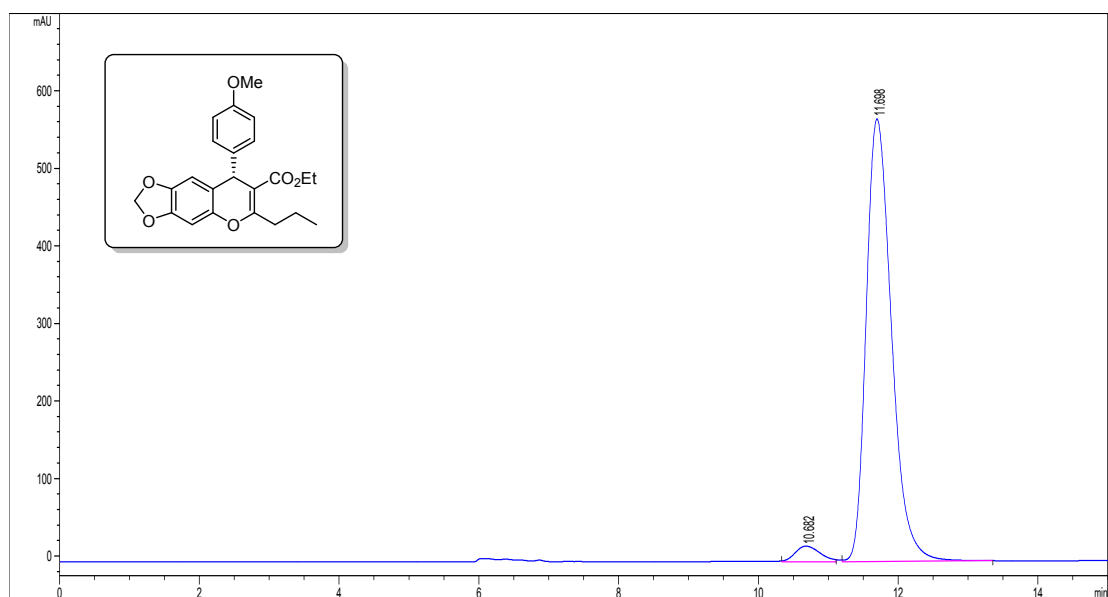

| # | Time   | Width  | Area     | Height   | Area%   |
|---|--------|--------|----------|----------|---------|
| 1 | 10.682 | 0.4153 | 503.3138 | 20.2003  | 3.4018  |
| 2 | 11.698 | 0.4173 | 1.4292e4 | 570.7978 | 96.5982 |

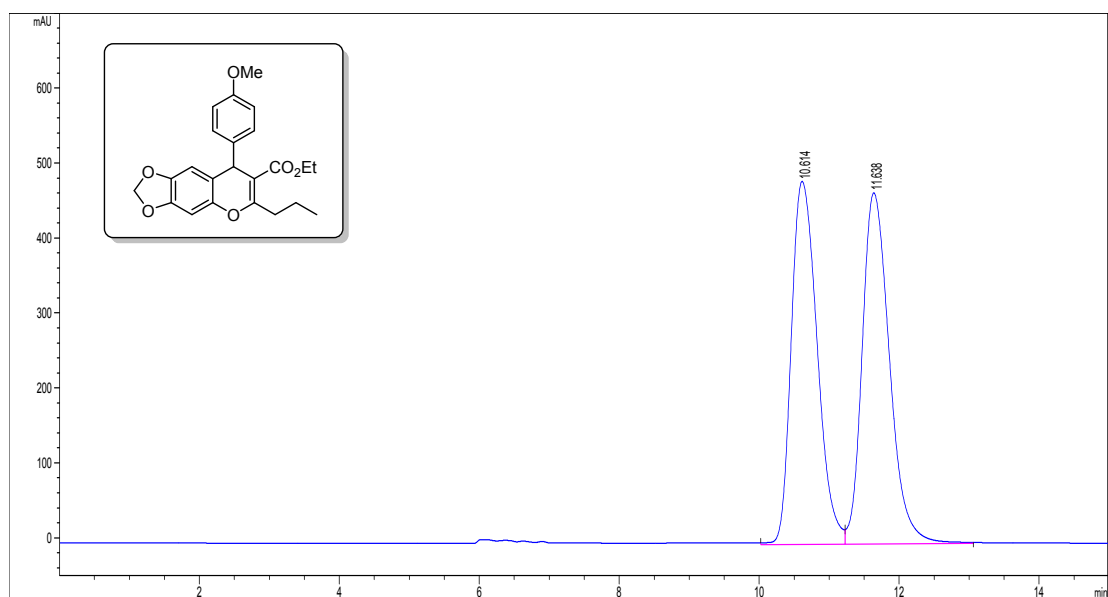

| # | Time   | Width  | Area     | Height   | Area%   |
|---|--------|--------|----------|----------|---------|
| 1 | 10.614 | 0.4281 | 1.2436e4 | 484.2076 | 49.4902 |
| 2 | 11.638 | 0.4516 | 1.2692e4 | 468.3732 | 50.5098 |

Daicel Chiralcel AS-H column, *n*-hexane/*i*-PrOH = 90: 10, 1.0 mL/min, 254 nm; t (major) = 4.79 min, t (minor) = 4.25 min; 92% ee.

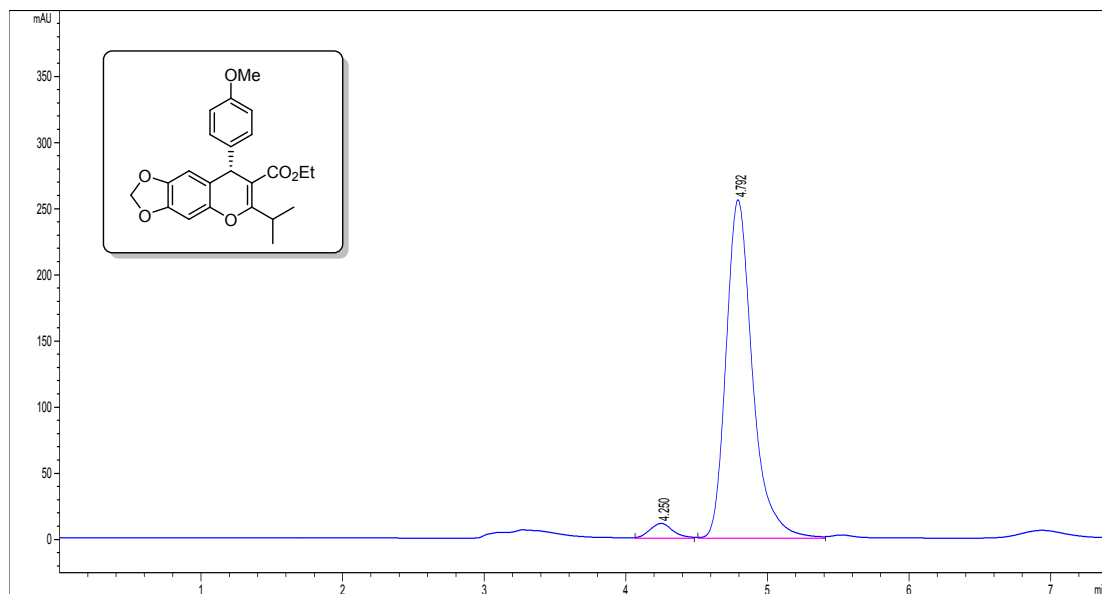

| # | Time  | Width  | Area      | Height    | Area%   |
|---|-------|--------|-----------|-----------|---------|
| 1 | 4.250 | 0.1928 | 131.6071  | 11.37496  | 3.8070  |
| 2 | 4.792 | 0.2165 | 3325.3440 | 255.95779 | 96.1930 |

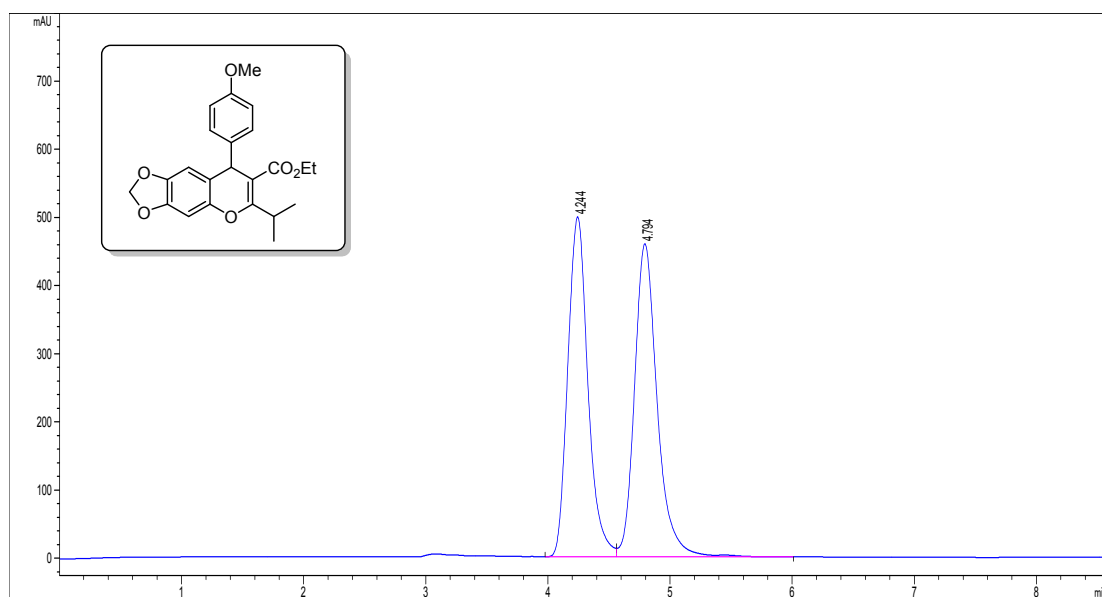

| # | Time  | Width  | Area      | Height   | Area%   |
|---|-------|--------|-----------|----------|---------|
| 1 | 4.244 | 0.1775 | 5707.2026 | 498.8137 | 49.0016 |
| 2 | 4.794 | 0.1958 | 5939.7730 | 459.4121 | 50.9984 |

Daicel Chiralcel OD-H column, *n*-hexane/*i*-PrOH = 90: 10, 0.8 mL/min, 254 nm; t (major) = 11.05 min, t (minor) = 9.34 min; 86% ee.

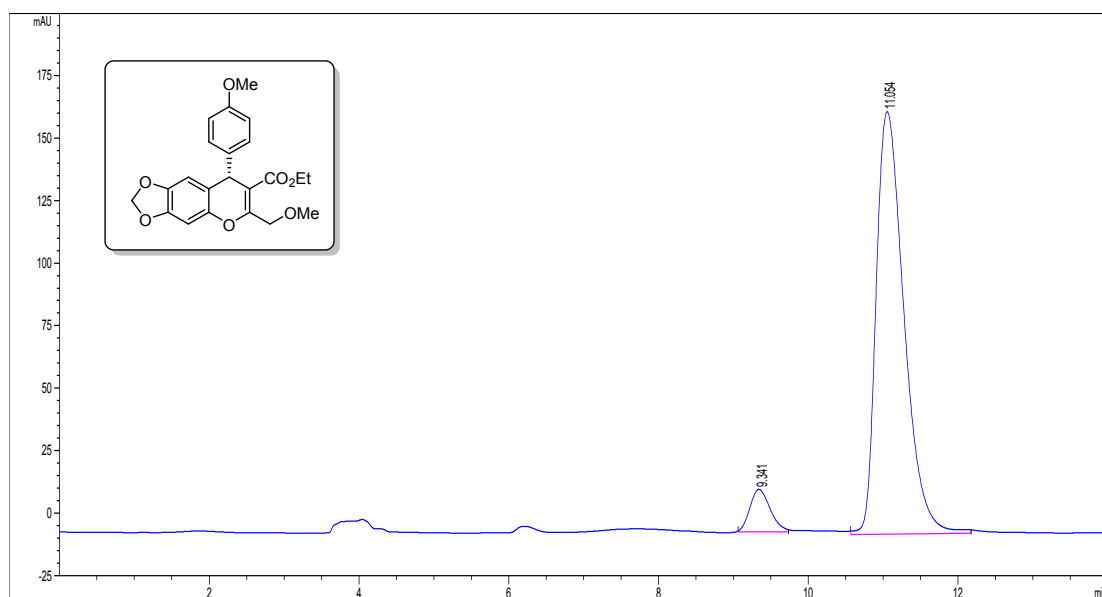

| # | Time   | Width  | Area      | Height   | Area%   |
|---|--------|--------|-----------|----------|---------|
| 1 | 9.341  | 0.3127 | 318.9261  | 16.9962  | 6.8057  |
| 2 | 11.054 | 0.4305 | 4367.2114 | 169.0933 | 93.1943 |

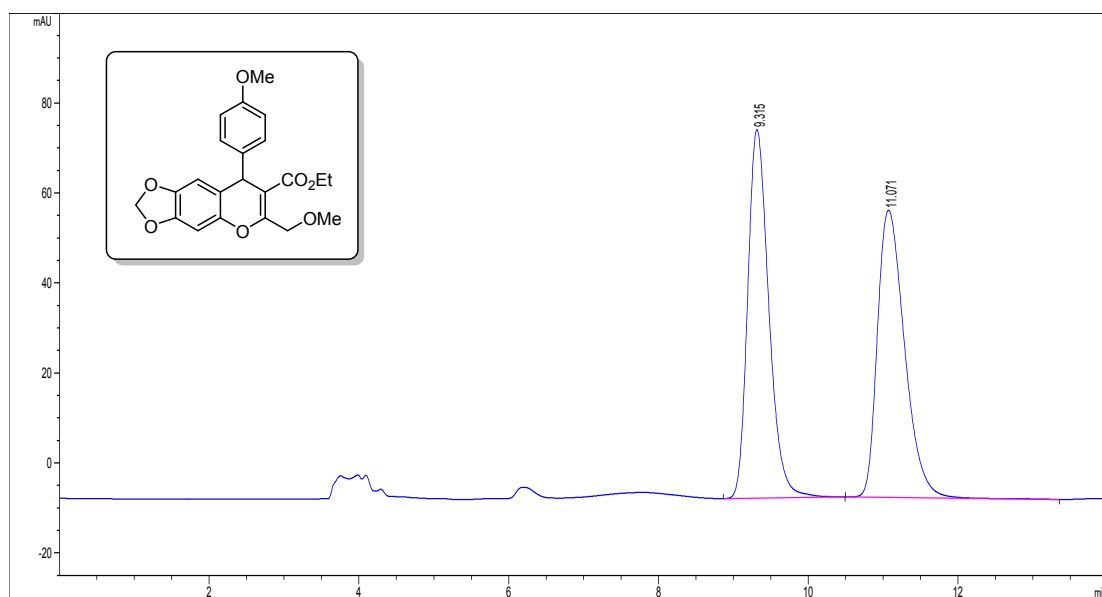

| # | Time   | Width  | Area      | Height  | Area%   |
|---|--------|--------|-----------|---------|---------|
| 1 | 9.315  | 0.3022 | 1603.7595 | 81.9922 | 49.8734 |
| 2 | 11.071 | 0.3933 | 1611.9028 | 63.8901 | 50.1266 |

Daicel Chiralcel OD-H column, *n*-hexane/*i*-PrOH = 90: 10, 0.8 mL/min, 254 nm; t (major) = 12.37 min, t (minor) = 11.19 min, 91% ee.

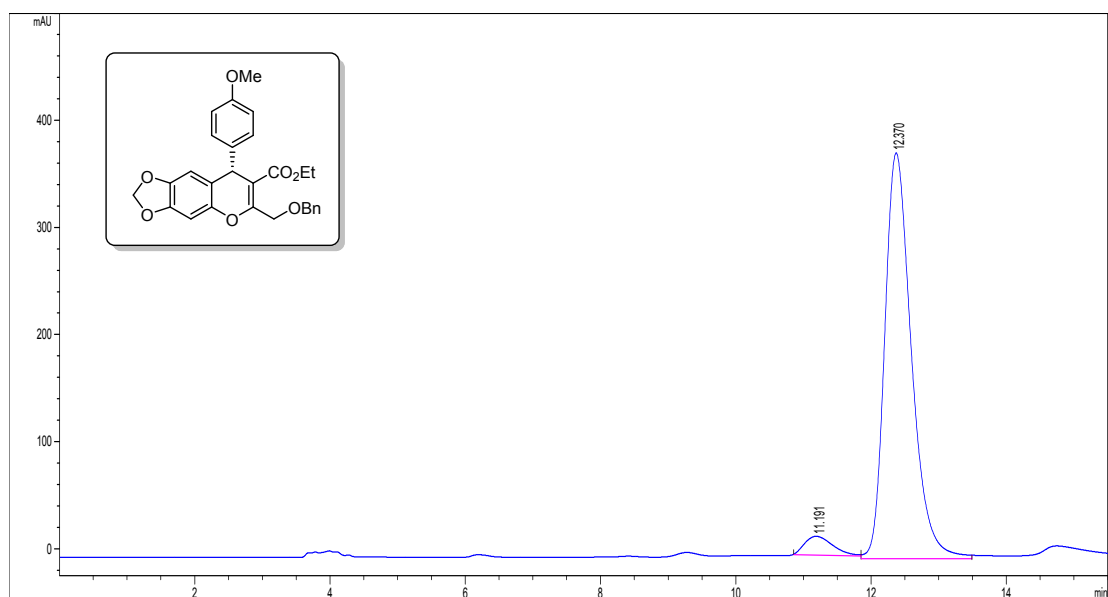

| # | Time   | Width  | Area     | Height   | Area%   |
|---|--------|--------|----------|----------|---------|
| 1 | 11.191 | 0.4818 | 505.4702 | 17.4867  | 4.6573  |
| 2 | 12.370 | 0.4551 | 1.0348e4 | 378.9387 | 95.3427 |

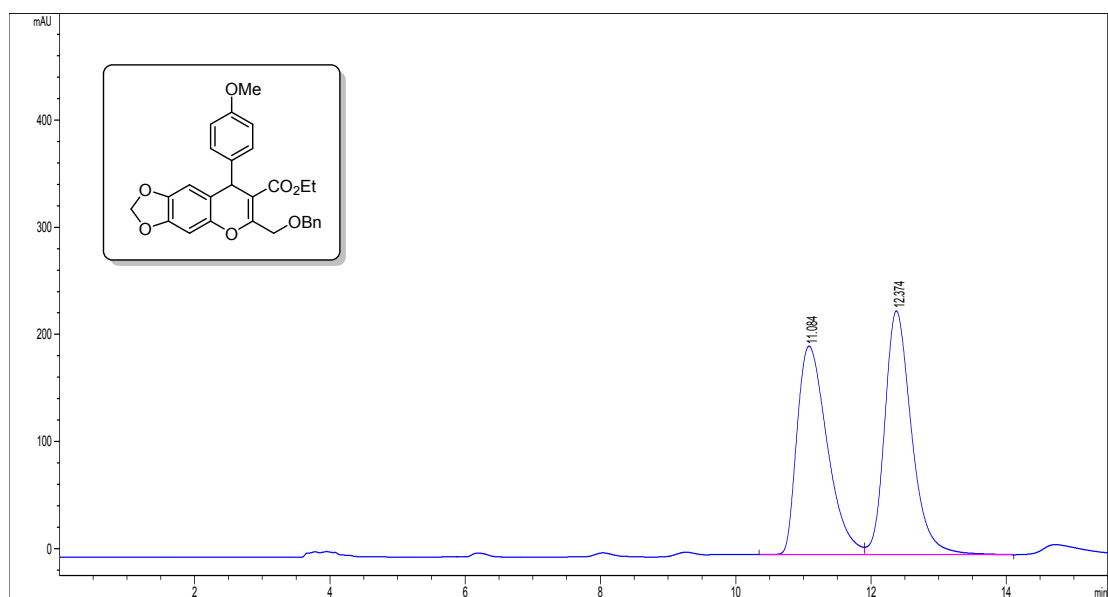

| # | Time   | Width  | Area      | Height   | Area%   |
|---|--------|--------|-----------|----------|---------|
| 1 | 11.084 | 0.4876 | 6031.5371 | 194.6176 | 49.0454 |
| 2 | 12.374 | 0.4203 | 6266.3257 | 227.5214 | 50.9546 |

Daicel Chiralcel OD-H column, *n*-hexane/*i*-PrOH = 90 : 10, 1.0 mL/min, 254 nm; t (major) = 10.69 min, t (minor) = 21.11 min, 85% ee.

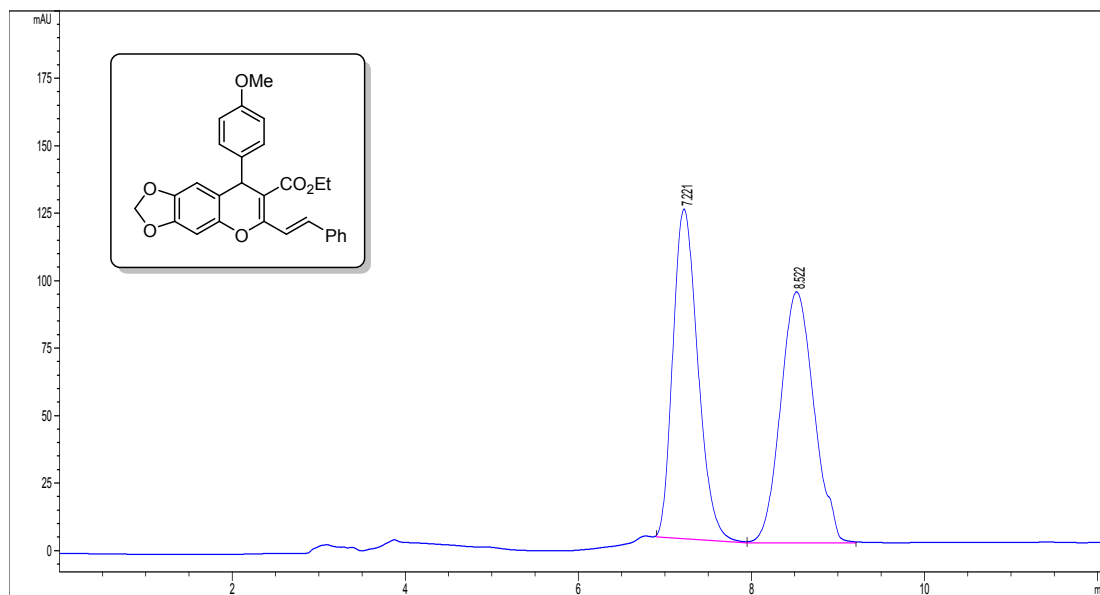

| # | Time  | Width  | Area      | Height   | Area%   |
|---|-------|--------|-----------|----------|---------|
| 1 | 7.221 | 0.3346 | 2452.1392 | 122.1355 | 49.5900 |
| 2 | 8.522 | 0.4471 | 2492.6855 | 92.9138  | 50.4100 |

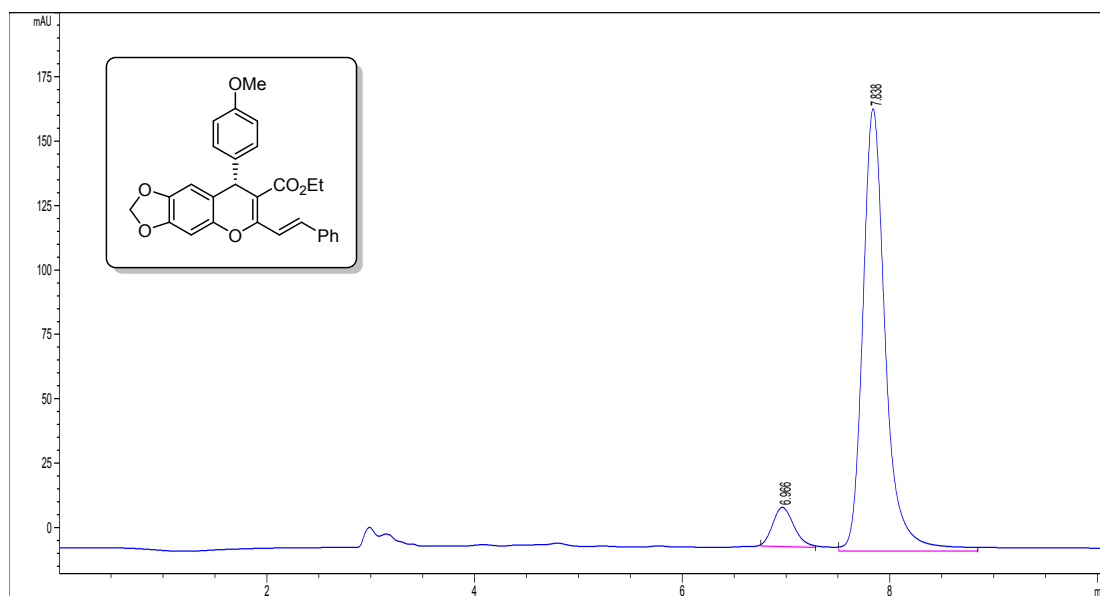

| # | Time  | Width  | Area      | Height   | Area%   |
|---|-------|--------|-----------|----------|---------|
| 1 | 6.966 | 0.2370 | 216.0415  | 15.1957  | 7.6611  |
| 2 | 7.838 | 0.2526 | 2603.9341 | 171.7888 | 92.3389 |

Daicel Chiralcel OD-H column, *n*-hexane/*i*-PrOH = 95: 5, 0.5 mL/min, 254 nm; t (major) = 20.22 min, t (minor) = 19.21 min; 70% ee.

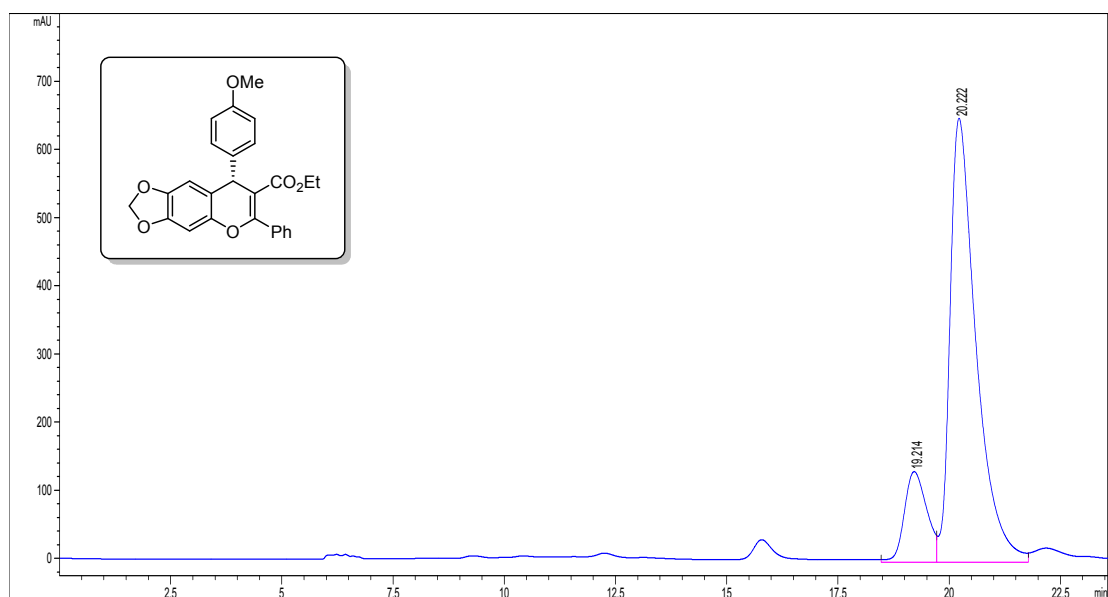

| # | Time   | Width  | Area      | Height   | Area%   |
|---|--------|--------|-----------|----------|---------|
| 1 | 19.214 | 0.5875 | 4700.6270 | 133.3401 | 14.9905 |
| 2 | 20.222 | 0.6818 | 2.6657e4  | 651.6686 | 85.0095 |

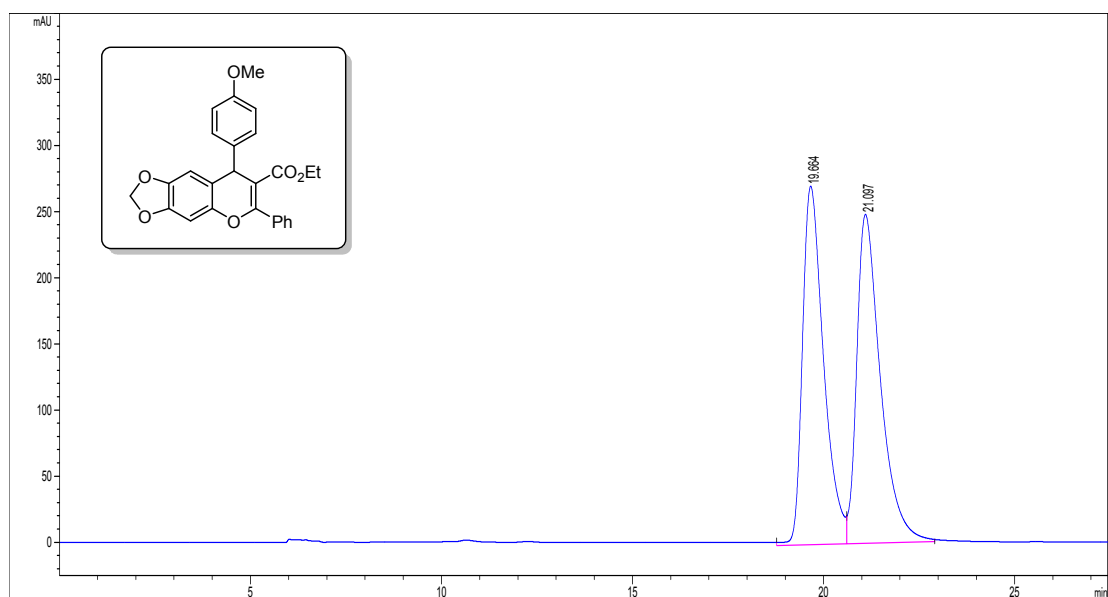

| # | Time   | Width  | Area     | Height   | Area%   |
|---|--------|--------|----------|----------|---------|
| 1 | 19.664 | 0.6422 | 1.0443e4 | 271.0310 | 49.3099 |
| 2 | 21.097 | 0.7195 | 1.0736e4 | 248.7006 | 50.6901 |

Daicel Chiralcel OD-H column, *n*-hexane/*i*-PrOH = 90 : 10, 0.8 mL/min, 254 nm; t (major) = 12.92 min, t (minor) = 10.85 min, 37% ee.

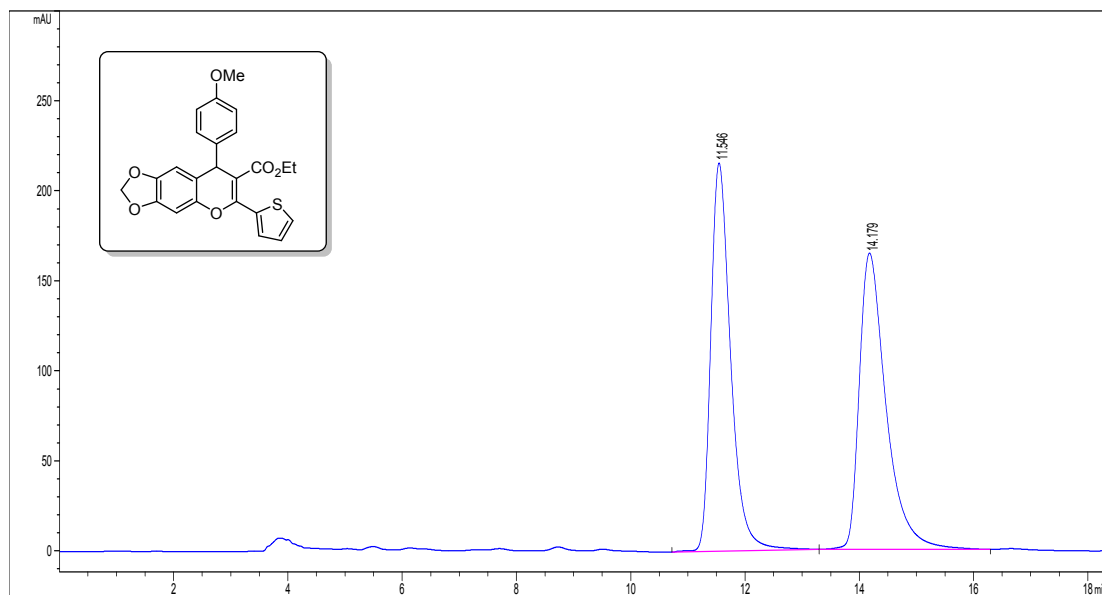

| # | Time   | Width  | Area      | Height   | Area%   |
|---|--------|--------|-----------|----------|---------|
| 1 | 11.546 | 0.3693 | 5215.8843 | 215.5906 | 49.3761 |
| 2 | 14.179 | 0.4903 | 5347.7017 | 164.4970 | 50.6239 |

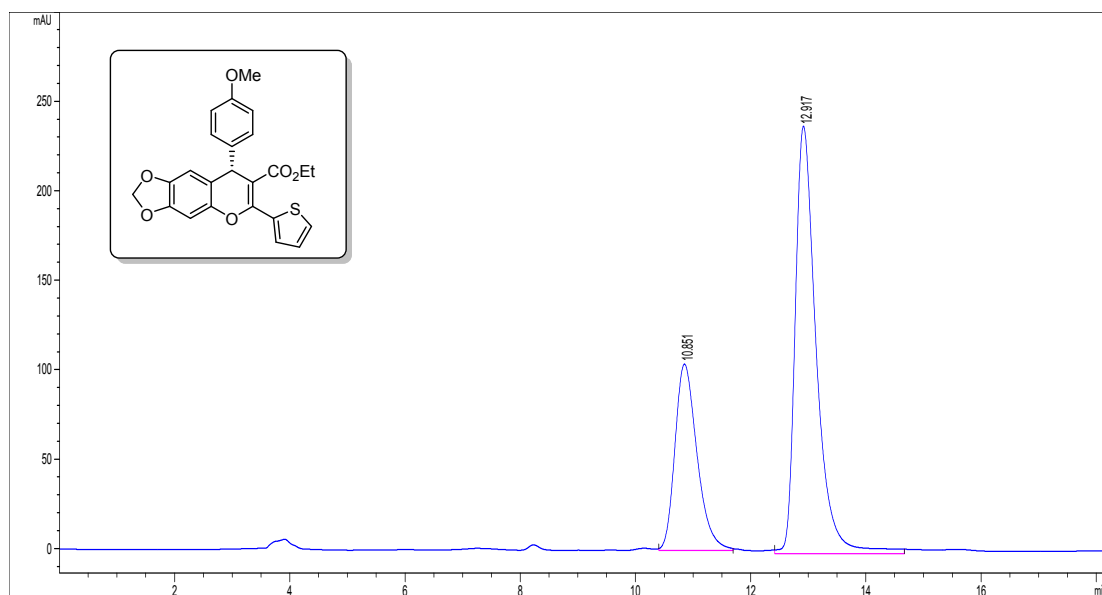

| # | Time   | Width  | Area      | Height   | Area%   |
|---|--------|--------|-----------|----------|---------|
| 1 | 10.851 | 0.4452 | 2784.5085 | 104.2469 | 31.4544 |
| 2 | 12.917 | 0.4233 | 6068.0064 | 238.9098 | 68.5456 |



Daicel Chiralcel AS-H column, *n*-hexane/*i*-PrOH = 90: 10, 1.0 mL/min, 254 nm; t (major) = 26.25 min, t (minor) = 15.19 min; 89% ee.

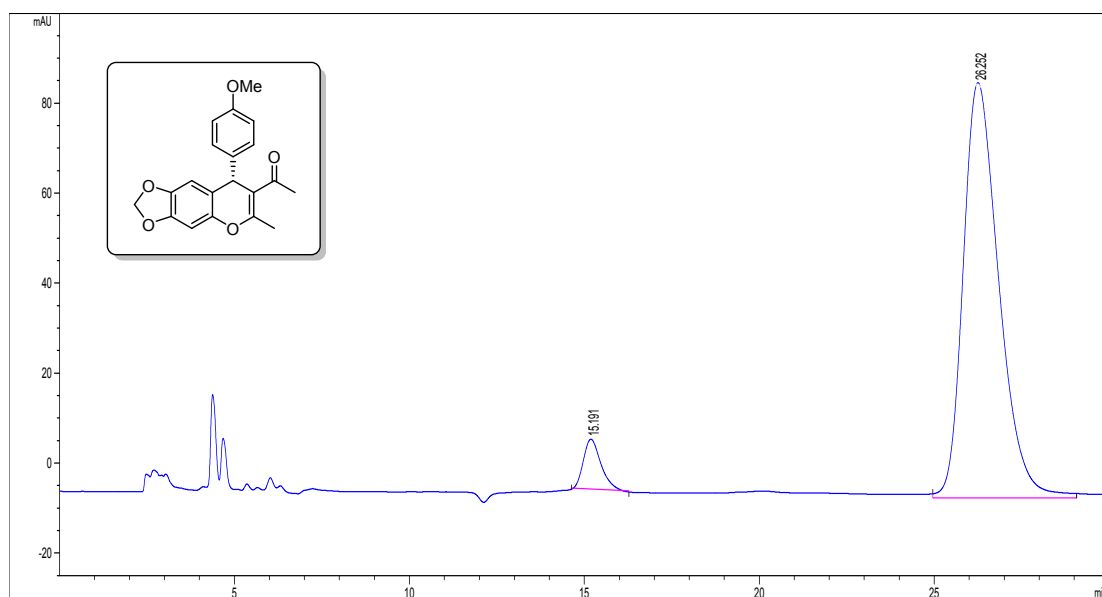

| # | Time   | Width  | Area      | Height  | Area%   |
|---|--------|--------|-----------|---------|---------|
| 1 | 15.191 | 0.5764 | 384.1294  | 11.1076 | 5.5516  |
| 2 | 26.252 | 1.1795 | 6535.1567 | 92.3416 | 94.4484 |

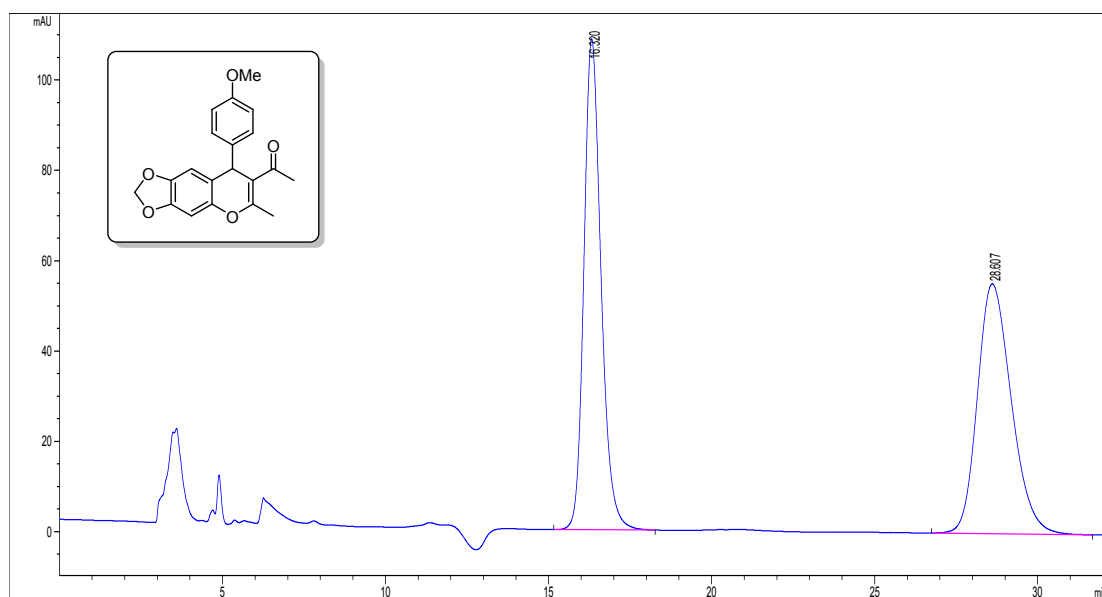

| # | Time   | Width  | Area      | Height   | Area%   |
|---|--------|--------|-----------|----------|---------|
| 1 | 16.320 | 0.5592 | 3973.3237 | 108.7671 | 49.8262 |
| 2 | 28.607 | 1.1156 | 4001.0352 | 55.3342  | 50.1738 |

Daicel Chiralcel AD-H column, *n*-hexane/*i*-PrOH = 90: 10, 0.8 mL/min, 254 nm; t (major) = 12.76 min, t (minor) = 6.27 min; 93% ee.

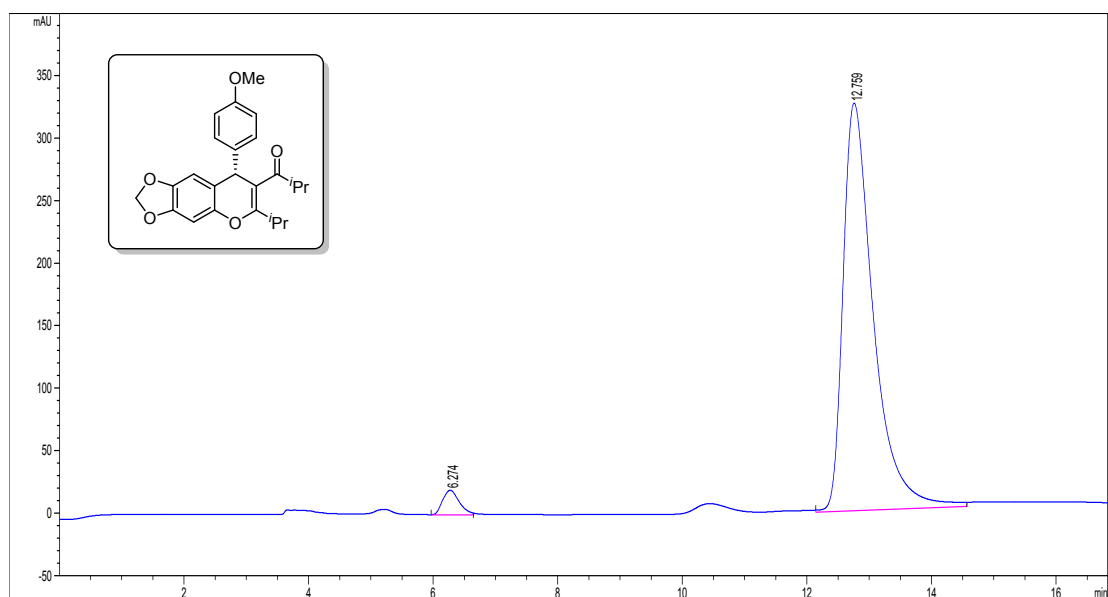

| # | Time   | Width  | Area     | Height   | Area%   |
|---|--------|--------|----------|----------|---------|
| 1 | 6.274  | 0.3106 | 369.8887 | 19.8480  | 3.2380  |
| 2 | 12.759 | 0.5645 | 1.1054e4 | 326.3401 | 96.7620 |

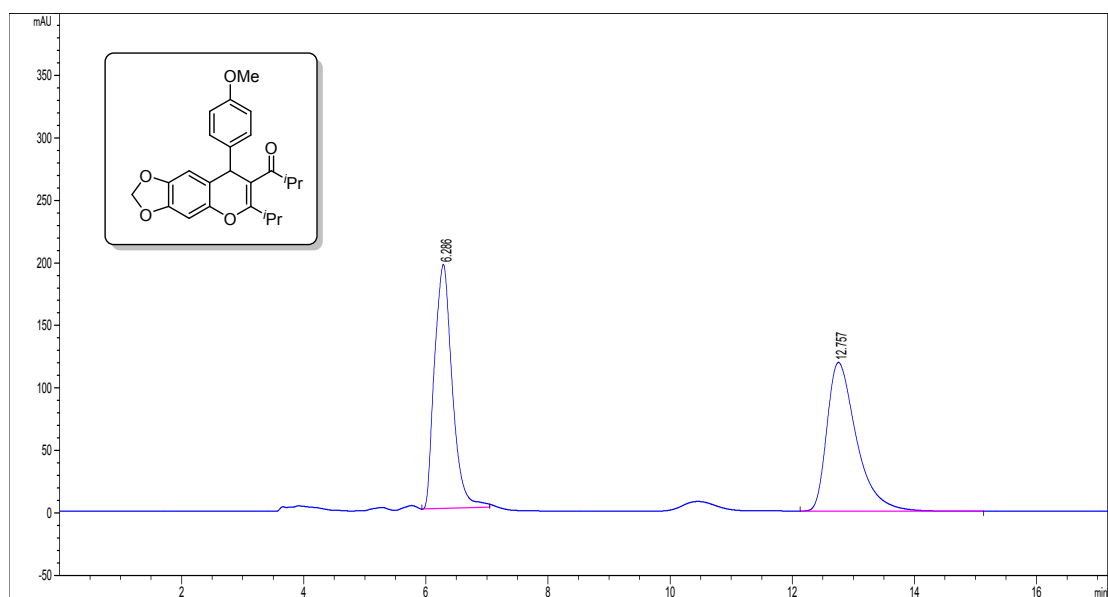

| # | Time   | Width  | Area      | Height   | Area%   |
|---|--------|--------|-----------|----------|---------|
| 1 | 6.286  | 0.3353 | 3929.0396 | 195.2711 | 49.6895 |
| 2 | 12.757 | 0.5081 | 3978.1399 | 118.9805 | 50.3105 |

Daicel Chiralcel OD-H column, *n*-hexane/*i*-PrOH = 90: 10, 0.8 mL/min, 254 nm; t (major) = 9.19 min, t (minor) = 10.42 min; 84% ee.

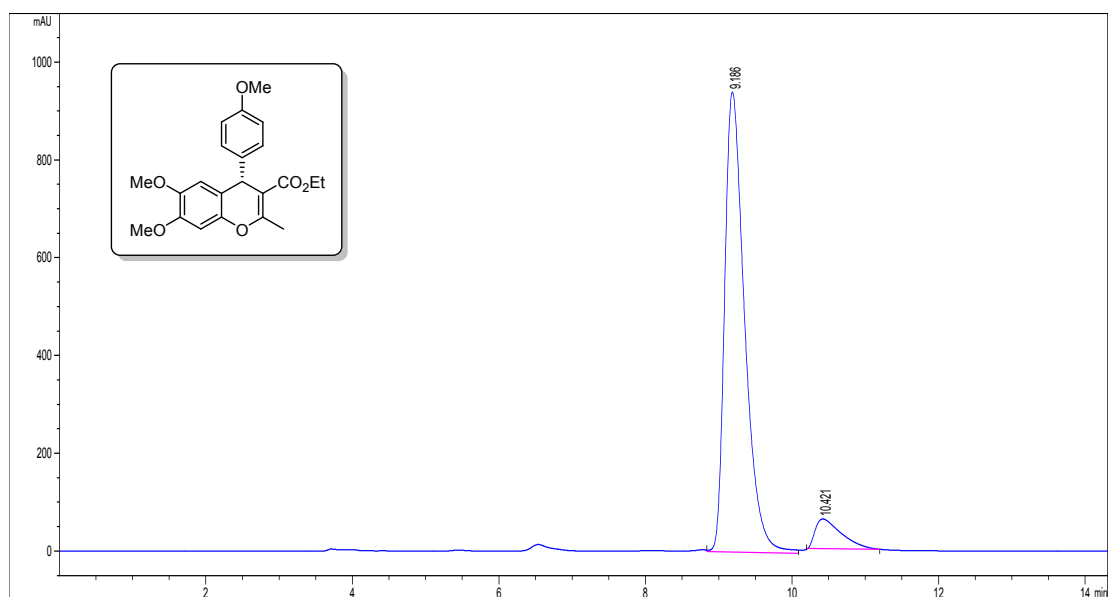

| # | Time   | Width  | Area      | Height   | Area%   |
|---|--------|--------|-----------|----------|---------|
| 1 | 9.186  | 0.3148 | 1.7784e4  | 941.4763 | 92.2574 |
| 2 | 10.421 | 0.4114 | 1492.4746 | 60.4568  | 7.7426  |

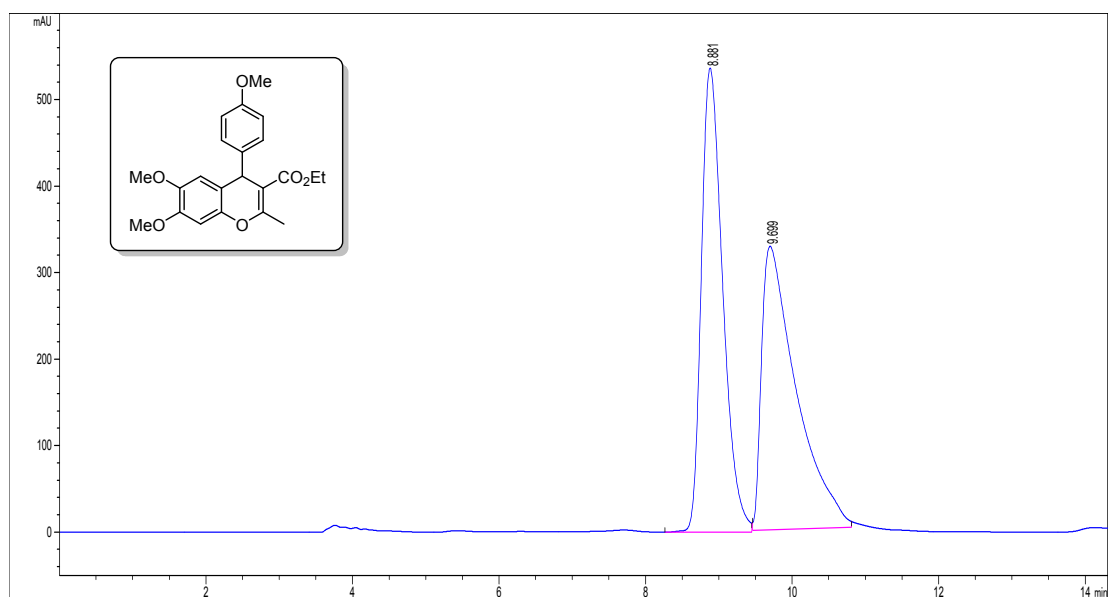

| # | Time  | Width  | Area     | Height   | Area%   |
|---|-------|--------|----------|----------|---------|
| 1 | 8.881 | 0.3125 | 1.0870e4 | 536.3215 | 50.2208 |
| 2 | 9.699 | 0.5474 | 1.0774e4 | 328.0470 | 49.7792 |

Daicel Chiralcel OD-H column, *n*-hexane/*i*-PrOH = 90: 10, 1.0 mL/min, 254 nm; t (major) = 12.16 min, t (minor) = 12.32 min; 63% ee.

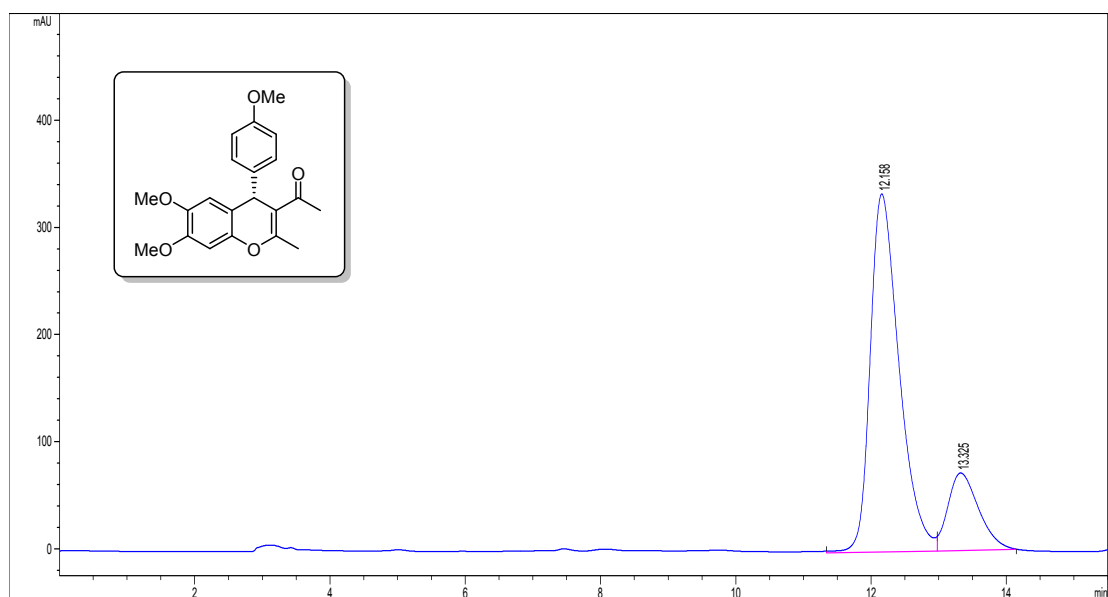

| # | Time   | Width  | Area      | Height   | Area%   |
|---|--------|--------|-----------|----------|---------|
| 1 | 12.158 | 0.4957 | 9942.6260 | 334.3191 | 81.3203 |
| 2 | 13.325 | 0.5260 | 2283.8740 | 72.3669  | 18.6797 |

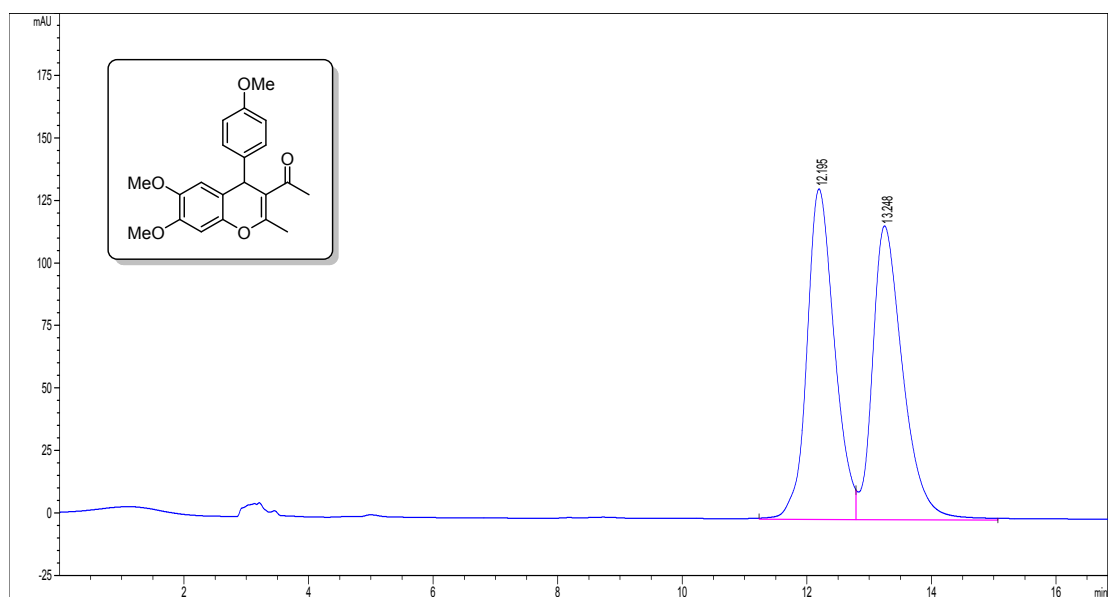

| # | Time   | Width  | Area      | Height   | Area%   |
|---|--------|--------|-----------|----------|---------|
| 1 | 12.195 | 0.5111 | 4054.5391 | 132.2274 | 50.4249 |
| 2 | 13.248 | 0.5653 | 3986.2014 | 117.5336 | 49.5751 |

Daicel Chiralcel AD-H column, *n*-hexane/*i*-PrOH = 90: 10, 0.8 mL/min, 254 nm; t (major) = 6.96 min, t (minor) = 8.08 min; 74% ee.

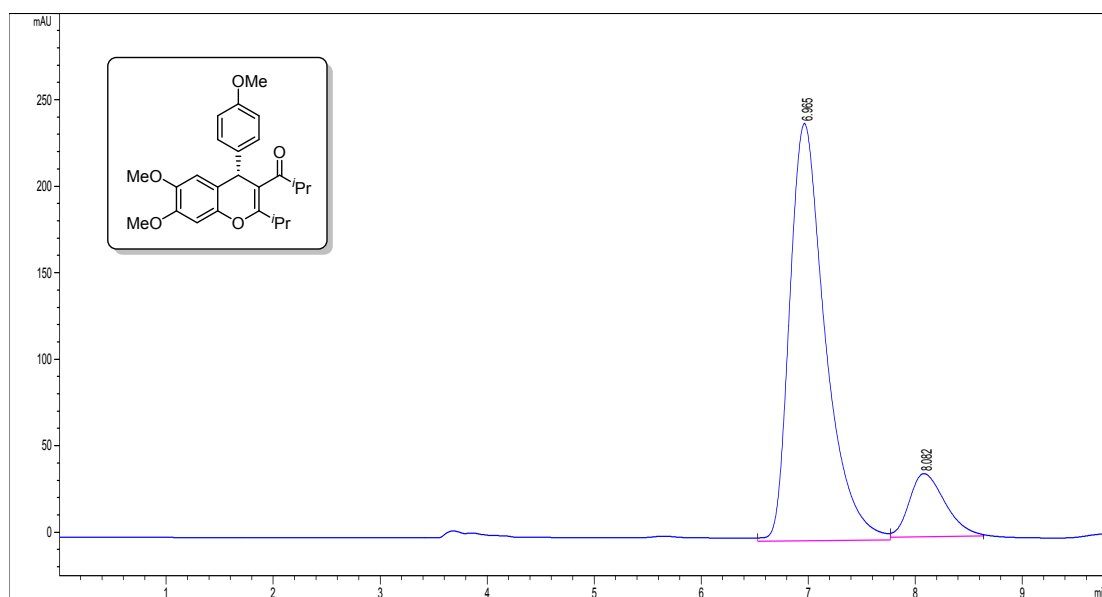

| # | Time  | Width  | Area      | Height   | Area%   |
|---|-------|--------|-----------|----------|---------|
| 1 | 6.965 | 0.3847 | 5568.5952 | 241.2363 | 86.8118 |
| 2 | 8.082 | 0.3867 | 845.9674  | 36.4625  | 13.1882 |

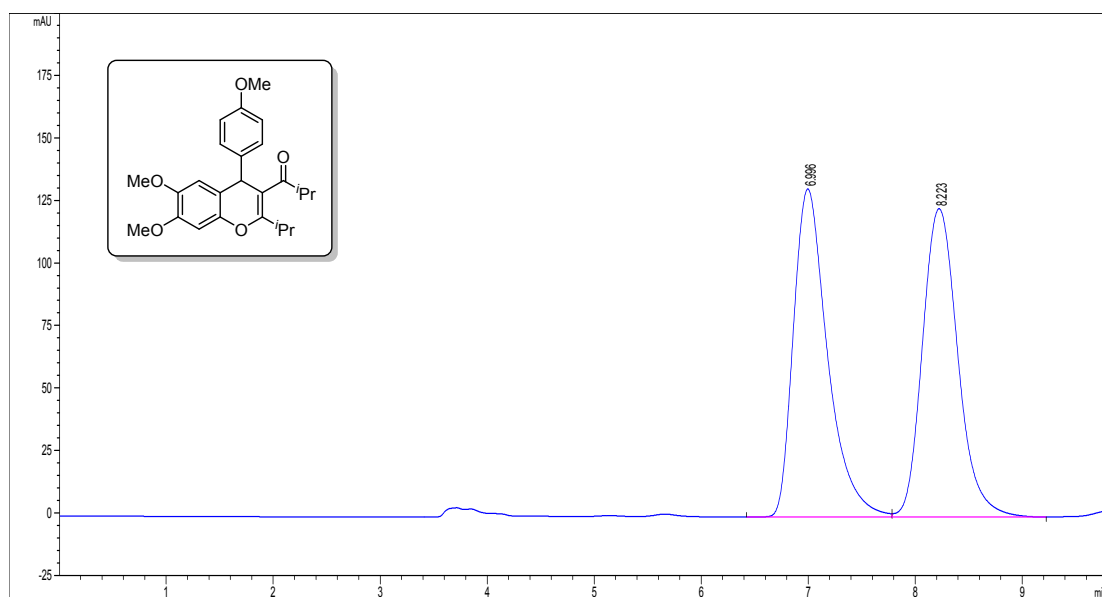

| # | Time  | Width  | Area      | Height   | Area%   |
|---|-------|--------|-----------|----------|---------|
| 1 | 6.996 | 0.3373 | 2905.6611 | 131.2627 | 50.6071 |
| 2 | 8.223 | 0.3600 | 2835.9458 | 123.4408 | 49.3929 |

Daicel Chiralcel OD-H column, *n*-hexane/*i*-PrOH = 95: 5, 0.5 mL/min, 254 nm; t (major) = 12.22 min, t (minor) = 11.37 min; 88% ee.

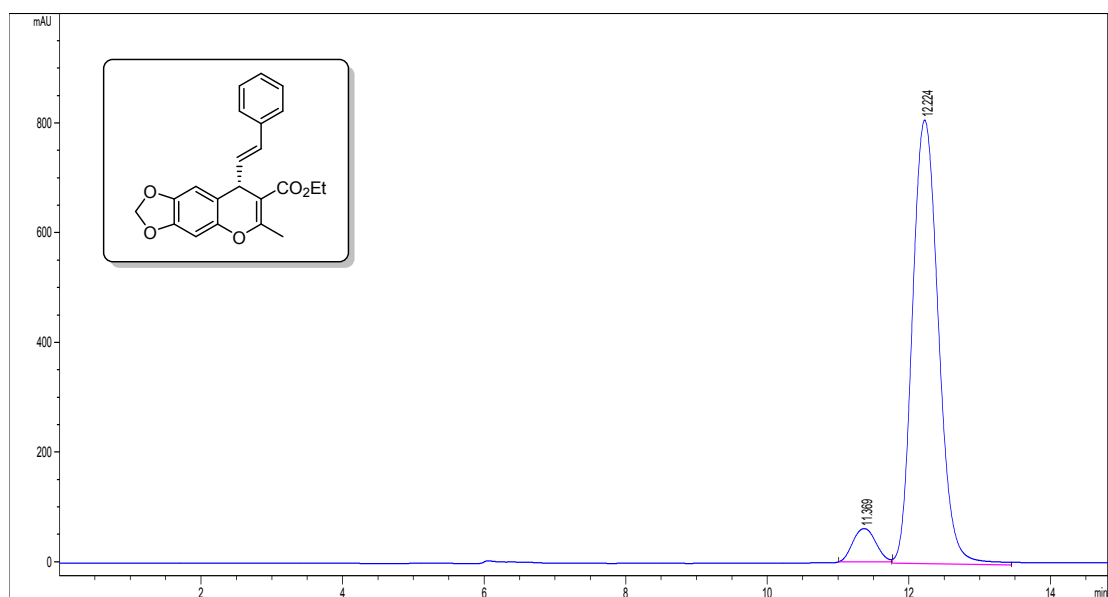

| # | Time   | Width  | Area      | Height   | Area%   |
|---|--------|--------|-----------|----------|---------|
| 1 | 11.369 | 0.3758 | 1364.9693 | 60.5412  | 6.2176  |
| 2 | 12.224 | 0.4243 | 2.0588e4  | 808.7687 | 93.7824 |

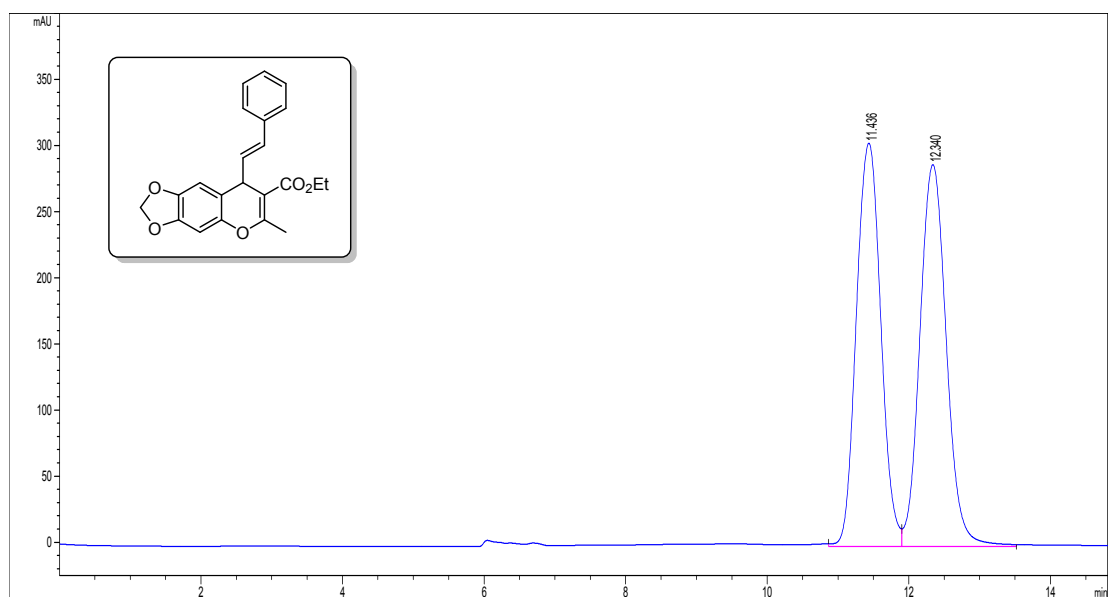

| # | Time   | Width  | Area      | Height   | Area%   |
|---|--------|--------|-----------|----------|---------|
| 1 | 11.436 | 0.3998 | 7310.7627 | 304.8051 | 49.4238 |
| 2 | 12.340 | 0.4320 | 7481.2349 | 288.6233 | 50.5762 |

Daicel Chiralcel OD-H column, n-hexane/i-PrOH = 90: 10, 0.8 mL/min, 254 nm; t (major) = 22.37 min, t (minor) = 20.35 min; 90% ee.

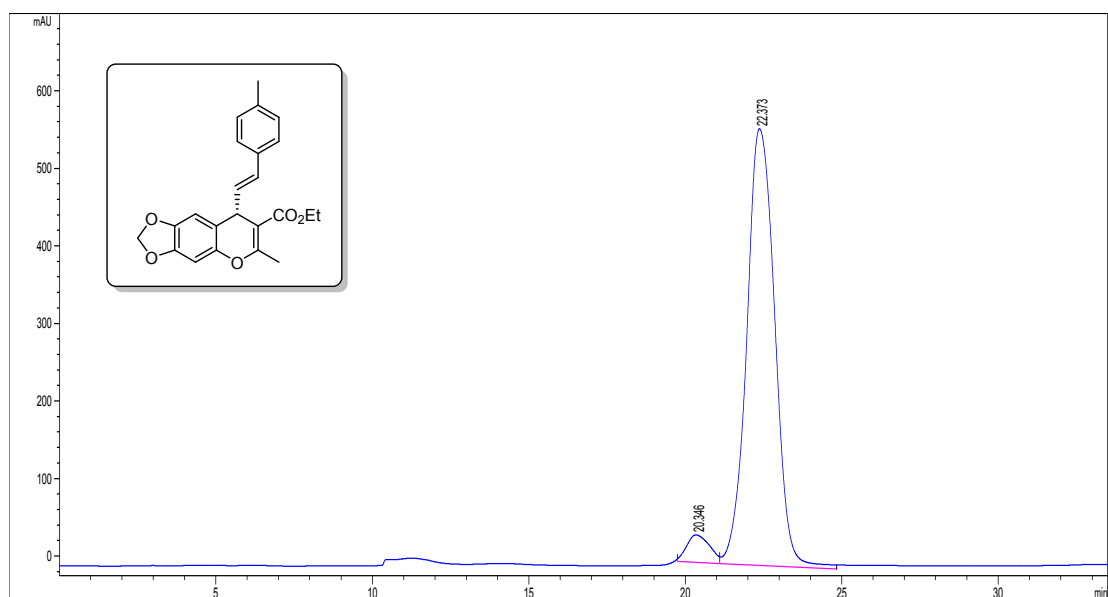

| # | Time   | Width  | Area      | Height   | Area%   |
|---|--------|--------|-----------|----------|---------|
| 1 | 20.346 | 0.8506 | 1816.9775 | 35.6002  | 4.9275  |
| 2 | 22.373 | 1.0376 | 3.5057e4  | 563.1126 | 95.0725 |

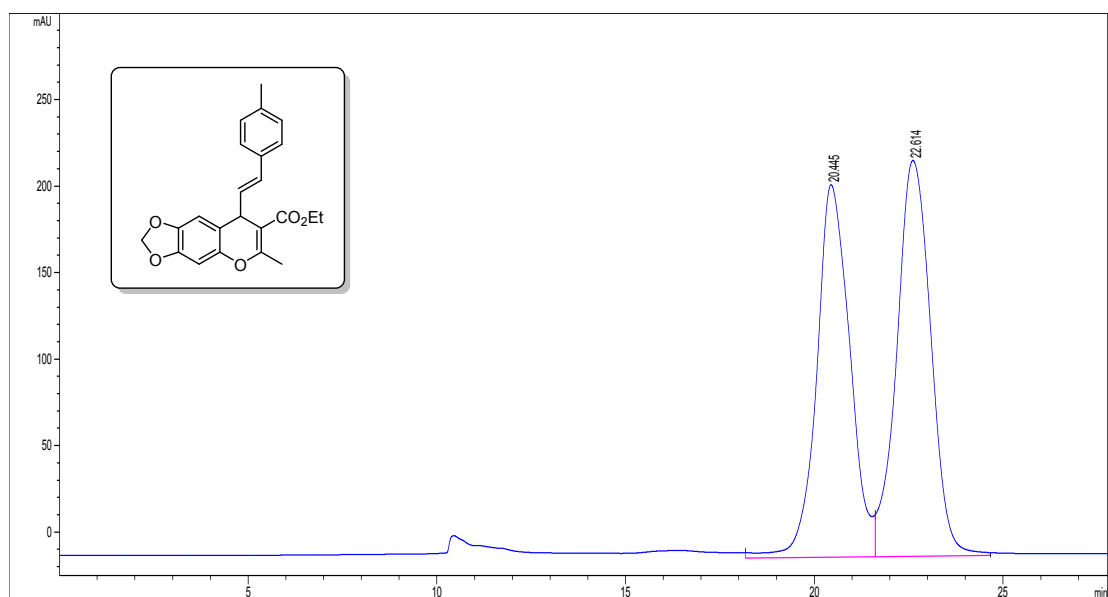

| # | Time   | Width  | Area     | Height   | Area%   |
|---|--------|--------|----------|----------|---------|
| 1 | 20.445 | 1.0227 | 1.3208e4 | 215.2437 | 47.9346 |
| 2 | 22.614 | 1.0450 | 1.4347e4 | 228.8174 | 52.0654 |

Daicel Chiralcel AD-H column, n-hexane/i-PrOH = 90: 10, 0.8 mL/min, 254 nm; t (major) = 19.66 min, t (minor) = 10.59 min; 80% ee.

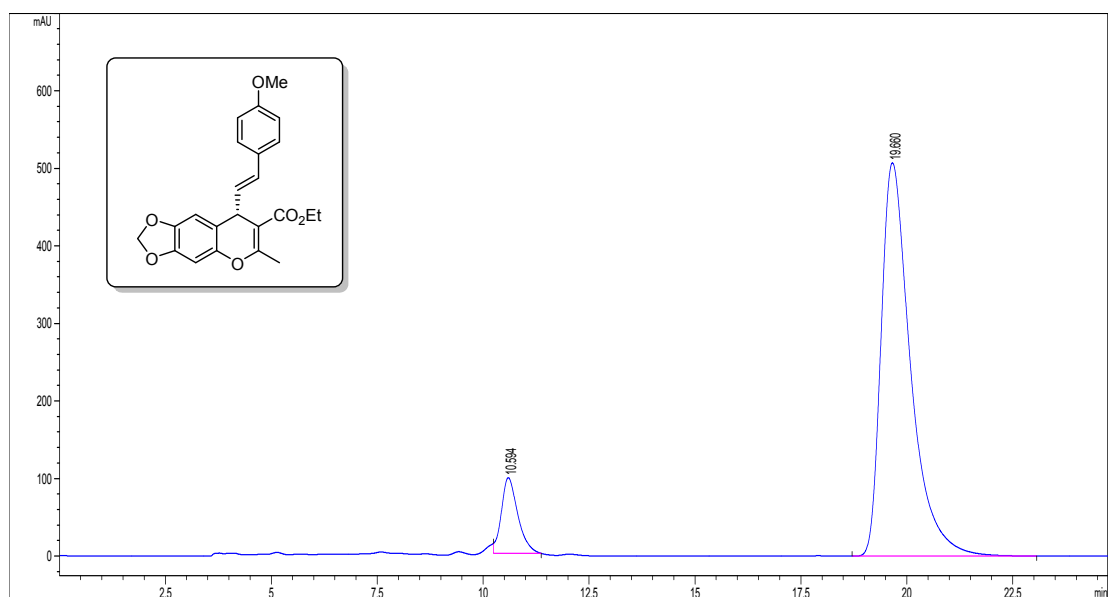

| # | Time   | Width  | Area      | Height   | Area%   |
|---|--------|--------|-----------|----------|---------|
| 1 | 10.594 | 0.4509 | 2644.2656 | 97.7504  | 9.7663  |
| 2 | 19.660 | 0.7281 | 2.4431e4  | 507.0810 | 90.2337 |

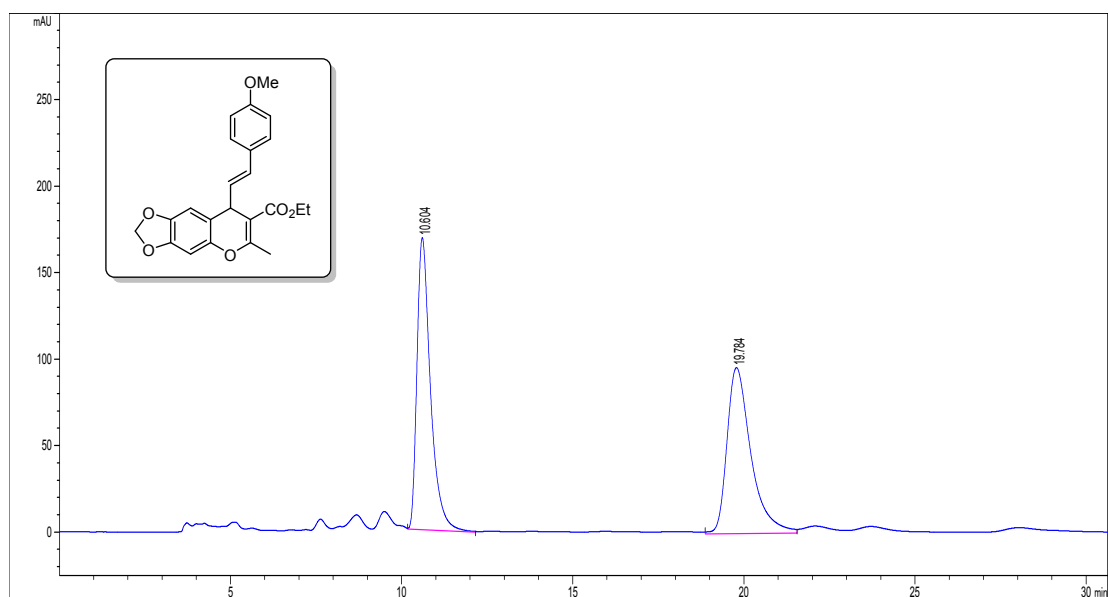

| # | Time   | Width  | Area      | Height   | Area%   |
|---|--------|--------|-----------|----------|---------|
| 1 | 10.604 | 0.4571 | 4631.5220 | 168.8865 | 49.6934 |
| 2 | 19.784 | 0.8138 | 4688.6709 | 96.0213  | 50.3066 |



Daicel Chiralcel AD-H column, n-hexane/i-PrOH = 90: 10, 0.8 mL/min, 254 nm; t (major) = 12.49 min, t (minor) = 7.81 min; 92% ee.

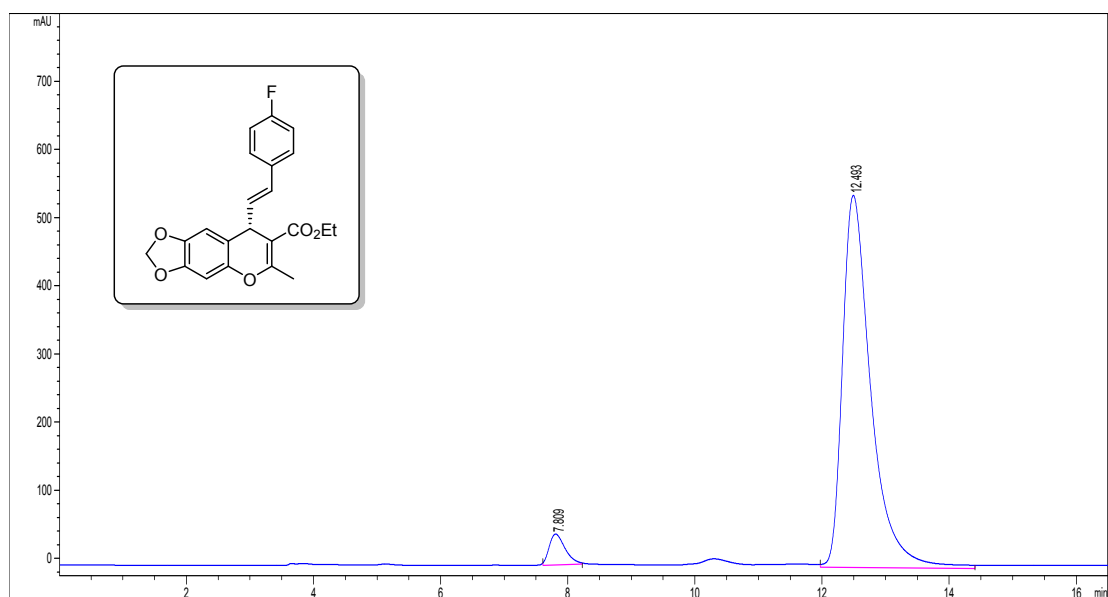

| # | Time   | Width  | Area     | Height   | Area%   |
|---|--------|--------|----------|----------|---------|
| 1 | 7.809  | 0.2909 | 791.7720 | 45.3590  | 4.4584  |
| 2 | 12.493 | 0.5180 | 1.6967e4 | 545.9666 | 95.5416 |

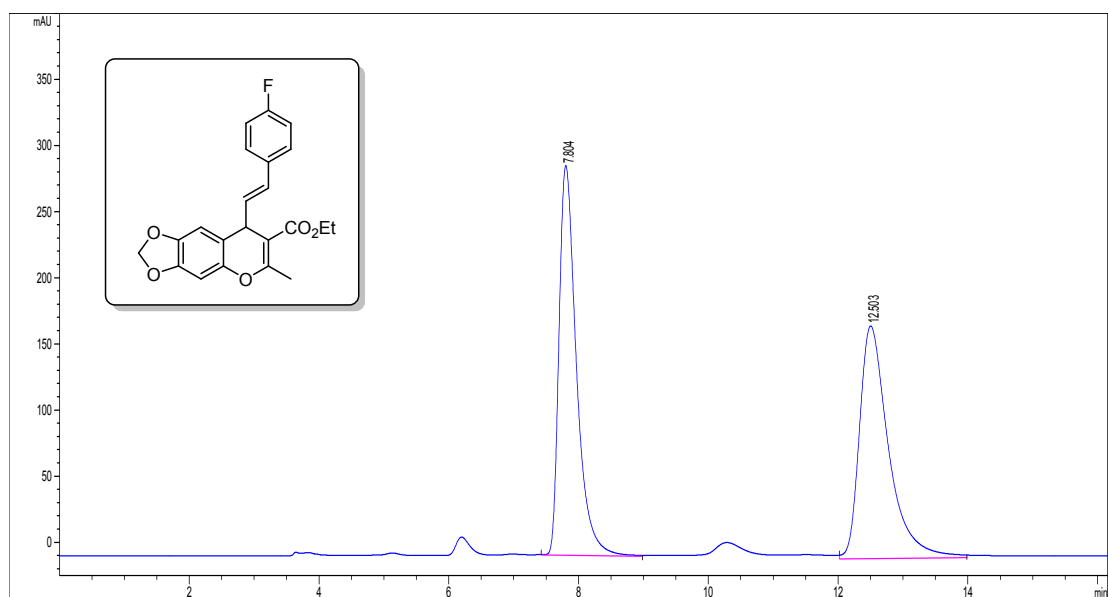

| # | Time   | Width  | Area      | Height   | Area%   |
|---|--------|--------|-----------|----------|---------|
| 1 | 7.804  | 0.3097 | 5472.3662 | 294.5315 | 49.9467 |
| 2 | 12.503 | 0.5195 | 5484.0386 | 175.9236 | 50.0533 |

Daicel Chiralcel AD-H column, n-hexane/i-PrOH = 90: 10, 0.8 mL/min, 254 nm; t (major) = 13.39 min, t (minor) = 8.54 min; 88% ee.

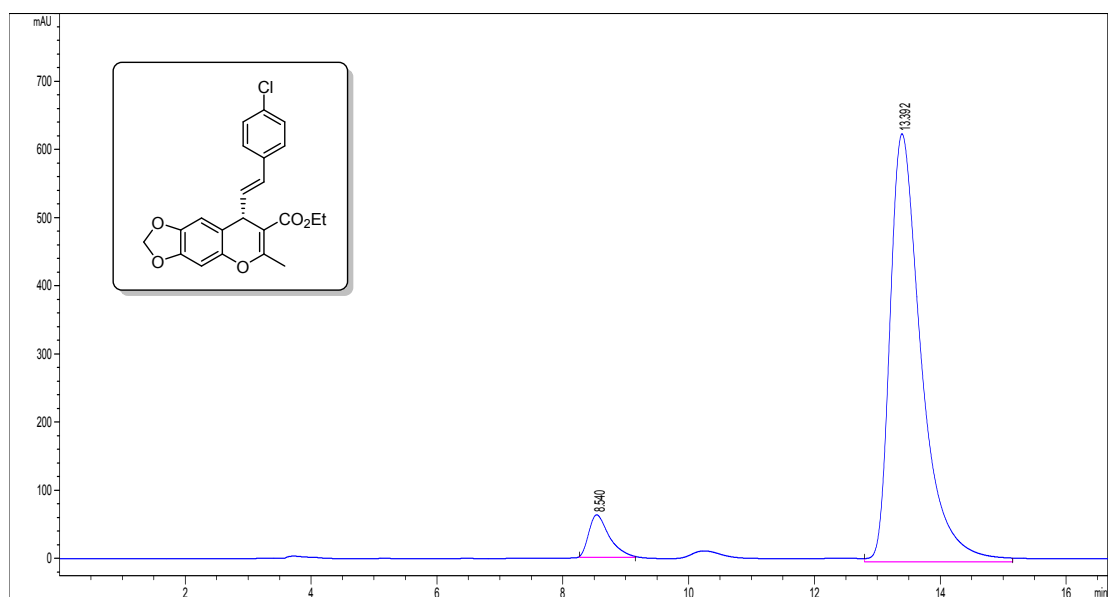

| # | Time   | Width  | Area      | Height   | Area%   |
|---|--------|--------|-----------|----------|---------|
| 1 | 8.540  | 0.3758 | 1405.0531 | 62.3221  | 6.0889  |
| 2 | 13.392 | 0.5754 | 2.1670e4  | 627.6981 | 93.9111 |

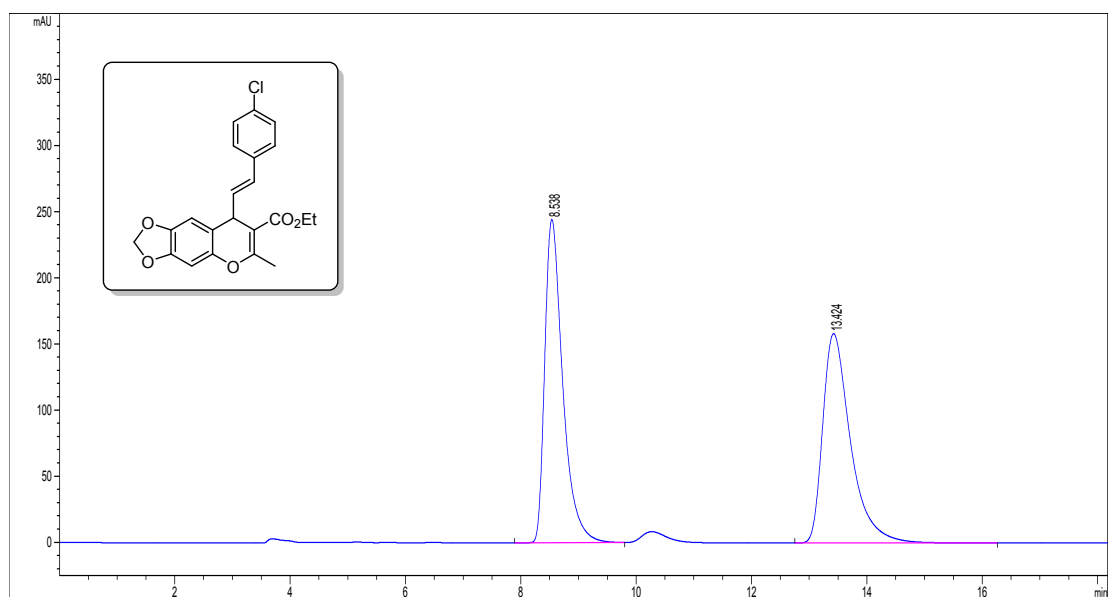

| # | Time   | Width  | Area      | Height   | Area%   |
|---|--------|--------|-----------|----------|---------|
| 1 | 8.538  | 0.3299 | 5296.0298 | 244.3203 | 49.9741 |
| 2 | 13.424 | 0.5068 | 5301.5112 | 158.2773 | 50.0259 |

Daicel Chiralcel OD-H column, n-hexane/i-PrOH = 98: 2, 0.3 mL/min, 254 nm; t (major) = 22.12 min, t (minor) = 20.12 min; 91% ee.

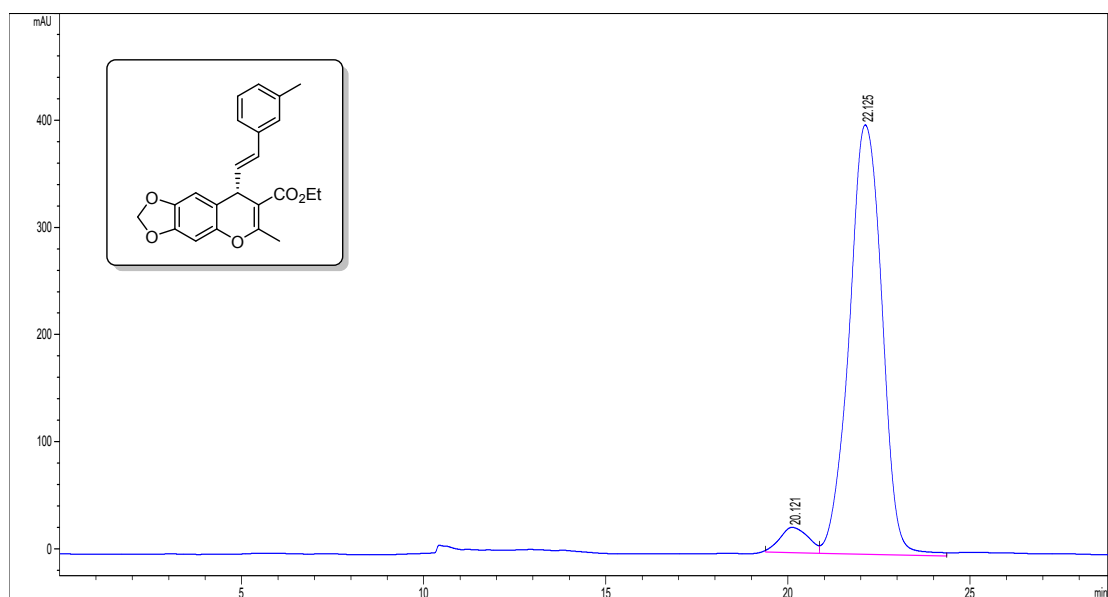

| # | Time   | Width  | Area      | Height   | Area%   |
|---|--------|--------|-----------|----------|---------|
| 1 | 20.121 | 0.8996 | 1266.8779 | 23.4710  | 4.8093  |
| 2 | 22.125 | 1.0425 | 2.5075e4  | 400.8650 | 95.1907 |

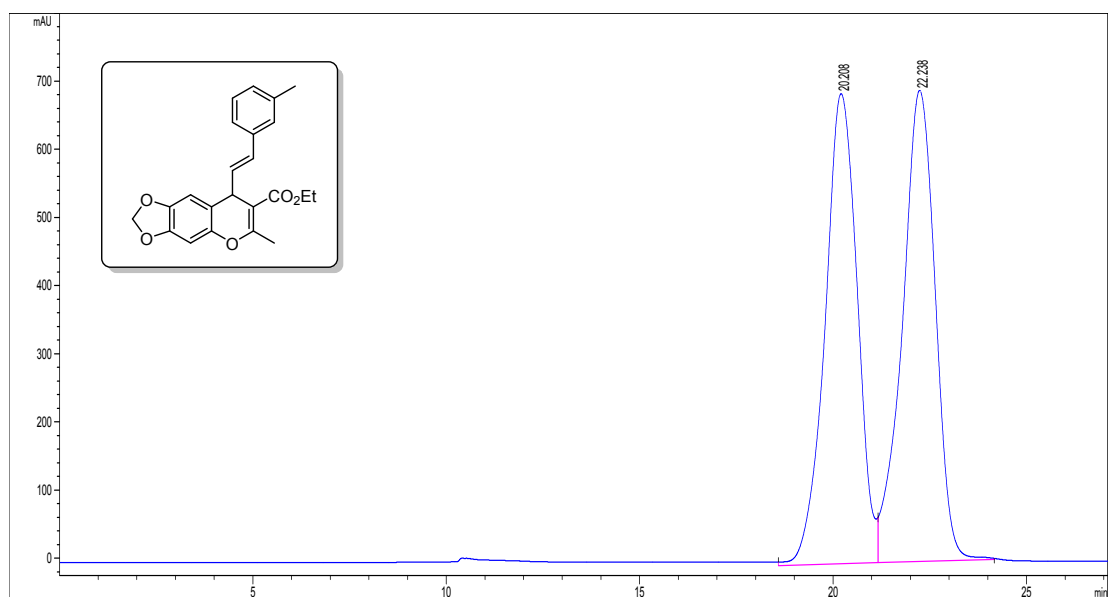

| # | Time   | Width  | Area     | Height   | Area%   |
|---|--------|--------|----------|----------|---------|
| 1 | 20.208 | 0.9661 | 3.9984e4 | 689.7943 | 49.4575 |
| 2 | 22.238 | 0.9854 | 4.0861e4 | 691.1212 | 50.5425 |

Daicel Chiralcel OD-H column, n-hexane/i-PrOH = 90: 10, 0.8 mL/min, 254 nm; t (major) = 8.71 min, t (minor) = 7.32 min; 87% ee.

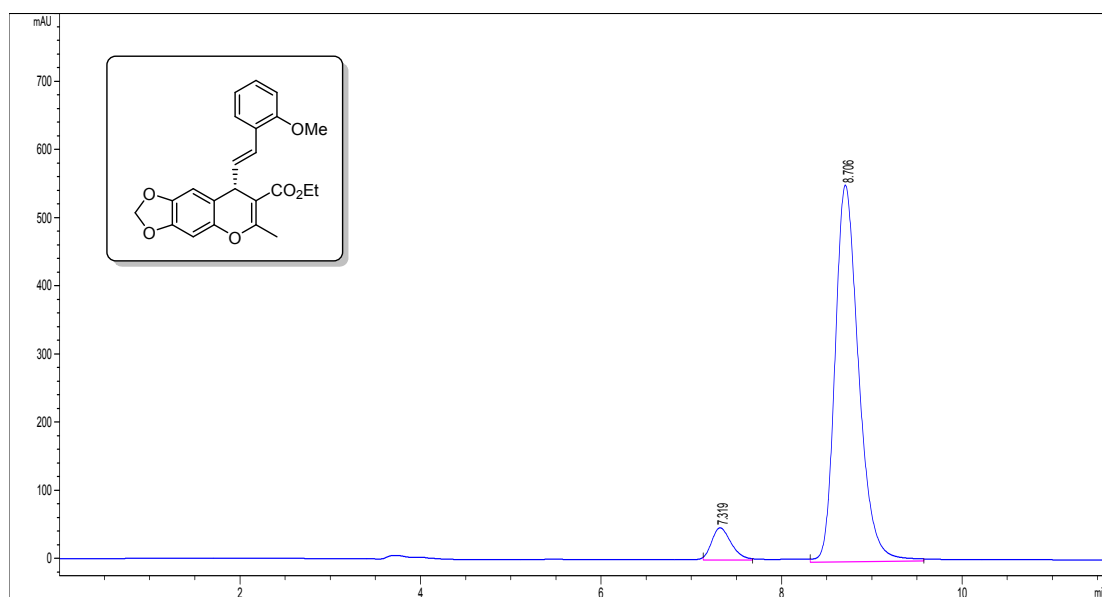

| # | Time  | Width  | Area     | Height   | Area%   |
|---|-------|--------|----------|----------|---------|
| 1 | 7.319 | 0.2495 | 705.9175 | 47.1537  | 6.5643  |
| 2 | 8.706 | 0.3028 | 1.0048e4 | 553.0427 | 93.4357 |

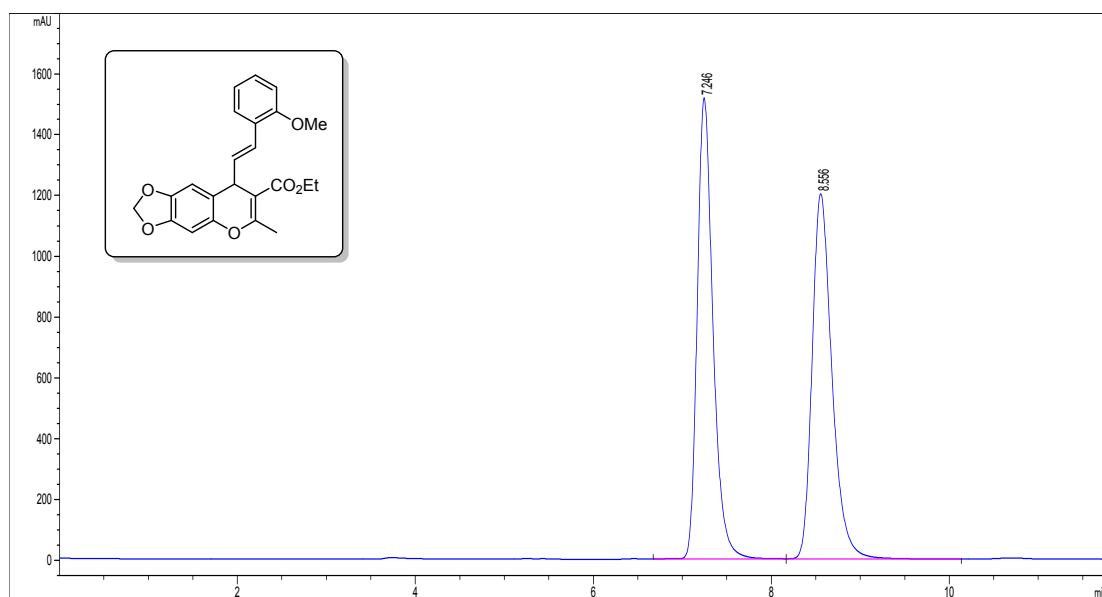

| # | Time  | Width  | Area     | Height    | Area%   |
|---|-------|--------|----------|-----------|---------|
| 1 | 7.246 | 0.1863 | 1.8642e4 | 1517.2754 | 50.0759 |
| 2 | 8.556 | 0.2356 | 1.8586e4 | 1200.6909 | 49.9241 |

Daicel Chiralcel OD-H column, n-hexane/i-PrOH = 95: 5, 0.5 mL/min, 254 nm; t (major) = 13.04 min, t (minor) = 12.36 min; 90% ee.

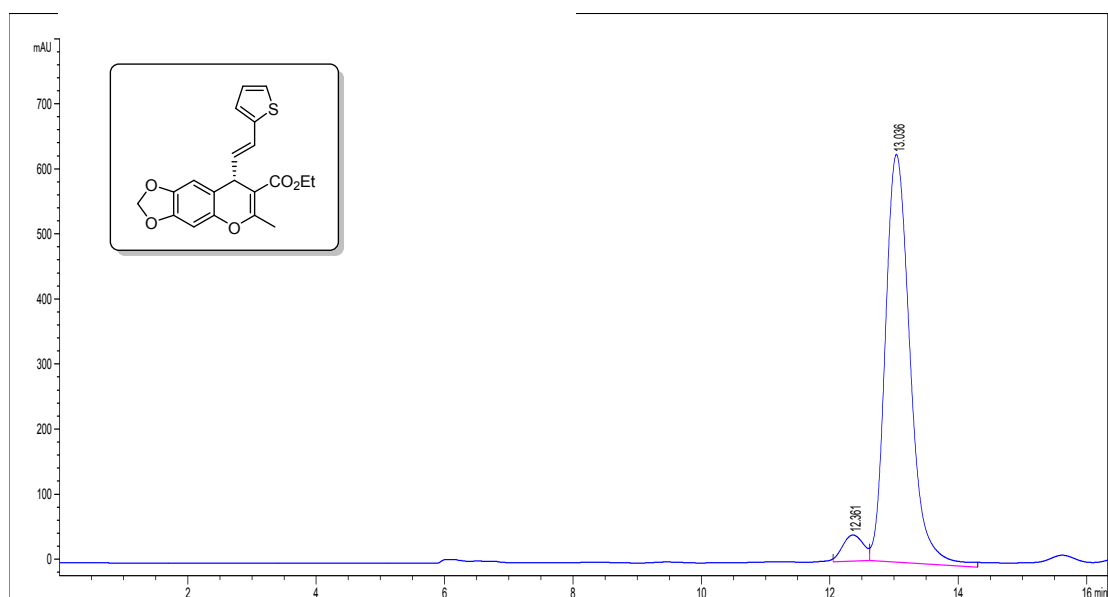

| # | Time   | Width  | Area     | Height   | Area%   |
|---|--------|--------|----------|----------|---------|
| 1 | 12.361 | 0.3784 | 904.7680 | 39.8485  | 5.1529  |
| 2 | 13.036 | 0.4430 | 1.6654e4 | 626.5772 | 94.8471 |

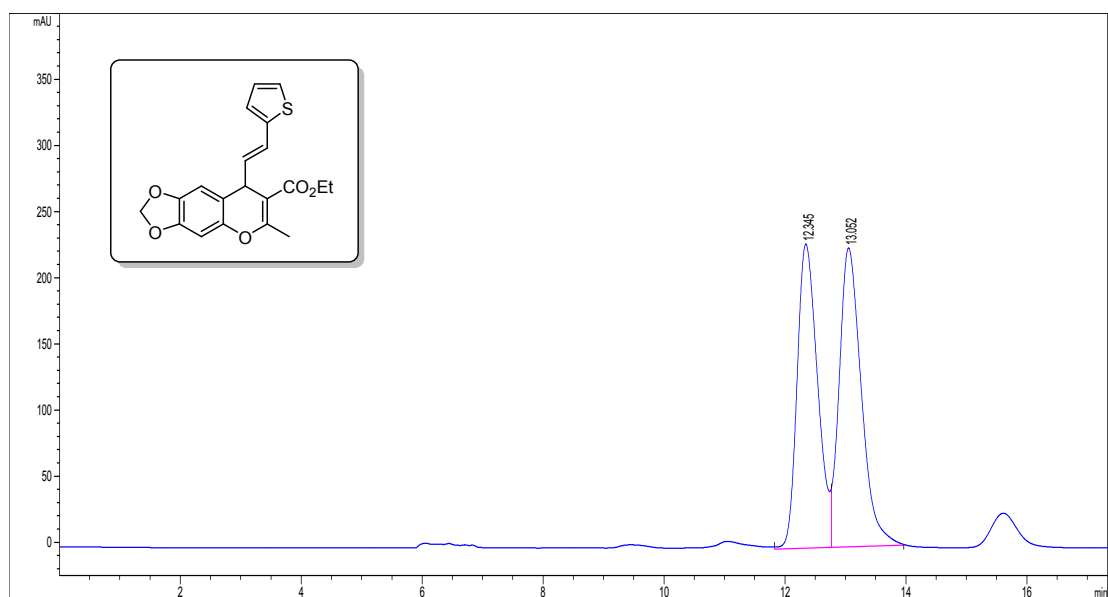

| # | Time   | Width  | Area      | Height   | Area%   |
|---|--------|--------|-----------|----------|---------|
| 1 | 12.345 | 0.3928 | 5415.6929 | 229.8174 | 48.6725 |
| 2 | 13.052 | 0.4213 | 5711.1177 | 225.9395 | 51.3275 |

Daicel Chiralcel OD-H column, n-hexane/i-PrOH = 90: 10, 0.8 mL/min, 254 nm; t (major) = 10.18 min, t (minor) = 8.41 min; 92% ee.

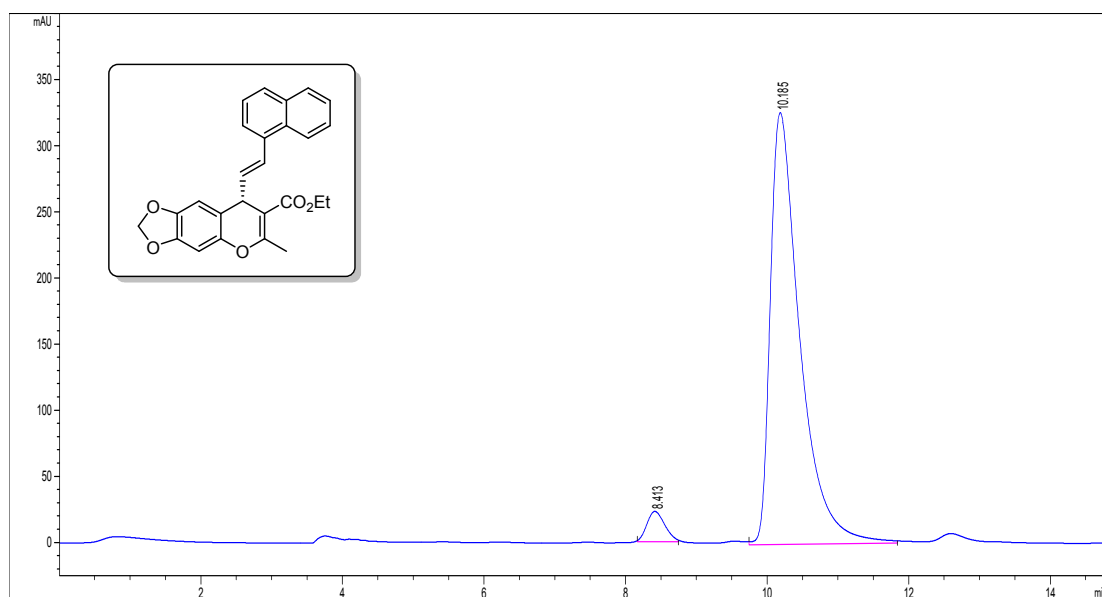

| # | Time   | Width  | Area      | Height   | Area%   |
|---|--------|--------|-----------|----------|---------|
| 1 | 8.413  | 0.2937 | 404.2397  | 22.9384  | 4.0924  |
| 2 | 10.185 | 0.4839 | 9473.6172 | 326.3145 | 95.9076 |

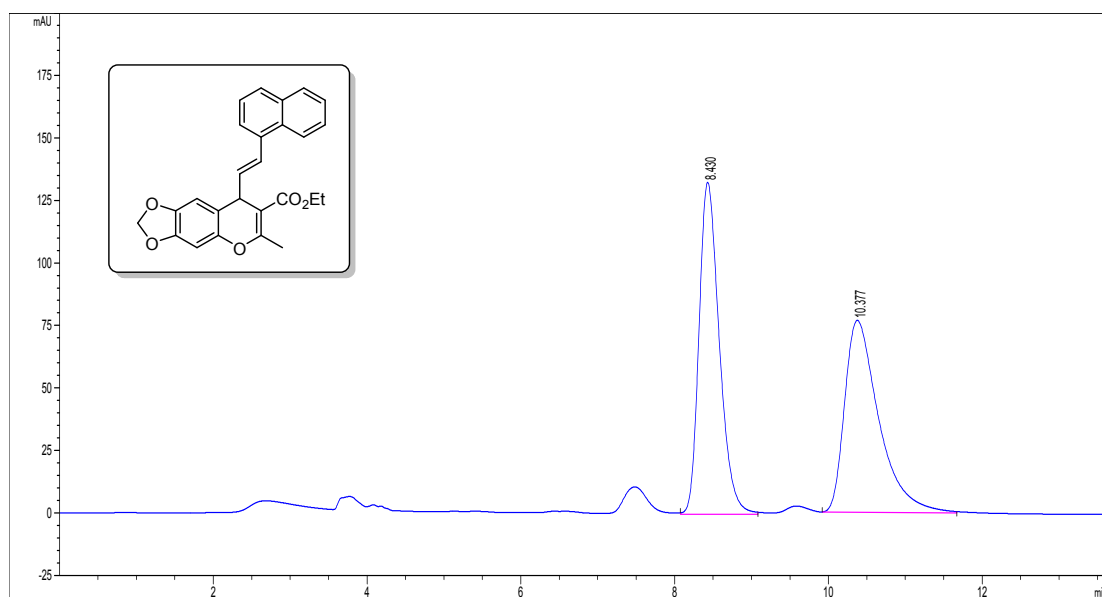

| # | Time   | Width  | Area      | Height   | Area%   |
|---|--------|--------|-----------|----------|---------|
| 1 | 8.430  | 0.3051 | 2431.8967 | 132.8485 | 50.5553 |
| 2 | 10.377 | 0.5160 | 2378.4734 | 76.8238  | 49.4447 |

Daicel Chiralcel OD-H column, n-hexane/i-PrOH = 80: 20, 1.0 mL/min, 254 nm; t (major) = 7.55 min, t (minor) = 11.91 min; 95% ee.

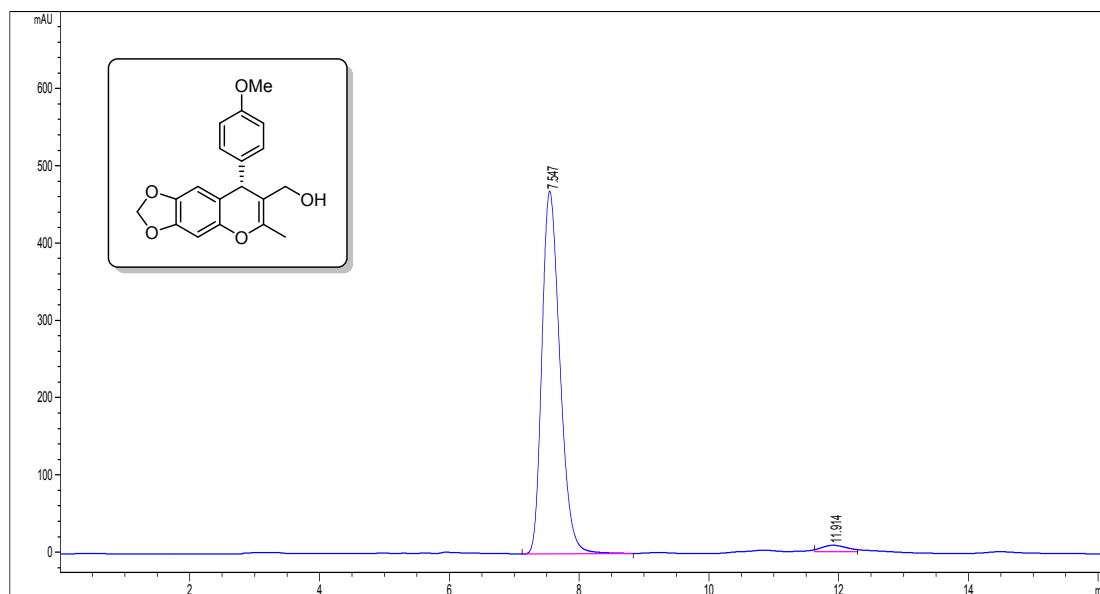

| # | Time   | Width  | Area      | Height   | Area%   |
|---|--------|--------|-----------|----------|---------|
| 1 | 7.547  | 0.2993 | 9021.9658 | 469.2894 | 97.4273 |
| 2 | 11.914 | 0.4650 | 238.2393  | 8.5397   | 2.5727  |

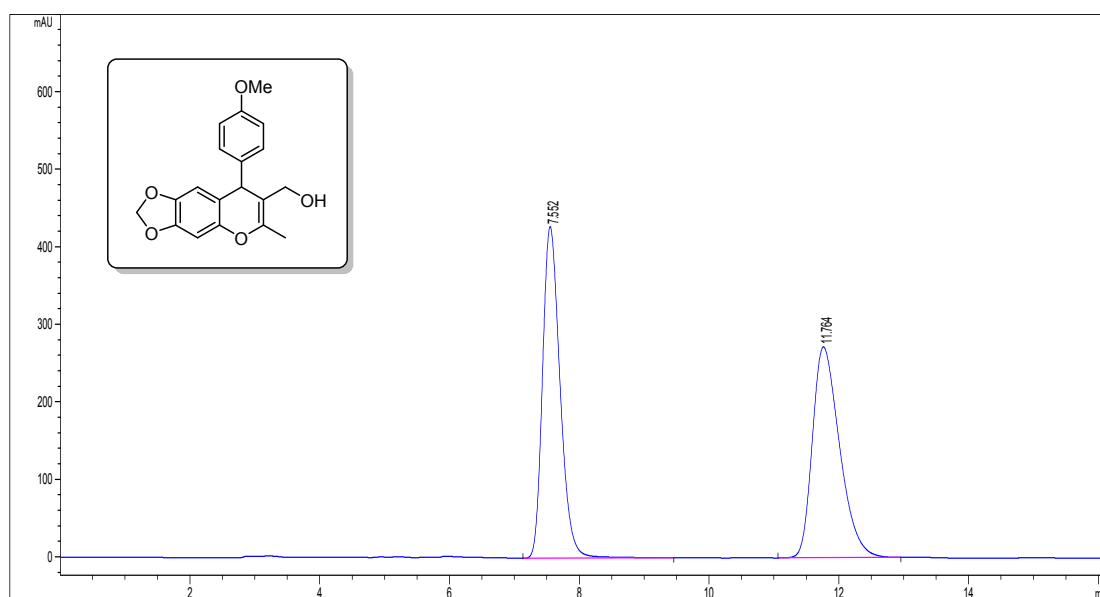

| # | Time   | Width  | Area      | Height   | Area%   |
|---|--------|--------|-----------|----------|---------|
| 1 | 7.552  | 0.2900 | 8029.5938 | 427.7153 | 50.3474 |
| 2 | 11.764 | 0.4488 | 7918.7866 | 271.9067 | 49.6526 |

Daicel Chiralcel OD-H column, n-hexane/i-PrOH = 90: 10, 0.8 mL/min, 254 nm; t (major) = 9.50 min, t (minor) = 8.00 min; 90% ee.

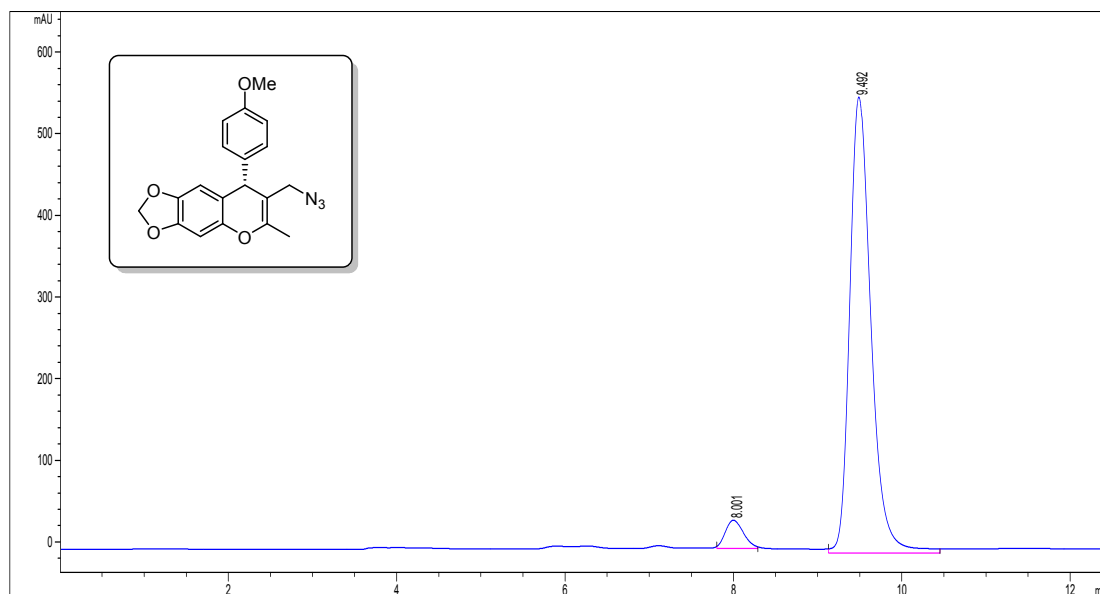

| # | Time  | Width  | Area      | Height   | Area%   |
|---|-------|--------|-----------|----------|---------|
| 1 | 8.001 | 0.2487 | 515.8508  | 34.5670  | 5.0100  |
| 2 | 9.492 | 0.2918 | 9780.4961 | 558.6799 | 94.9900 |

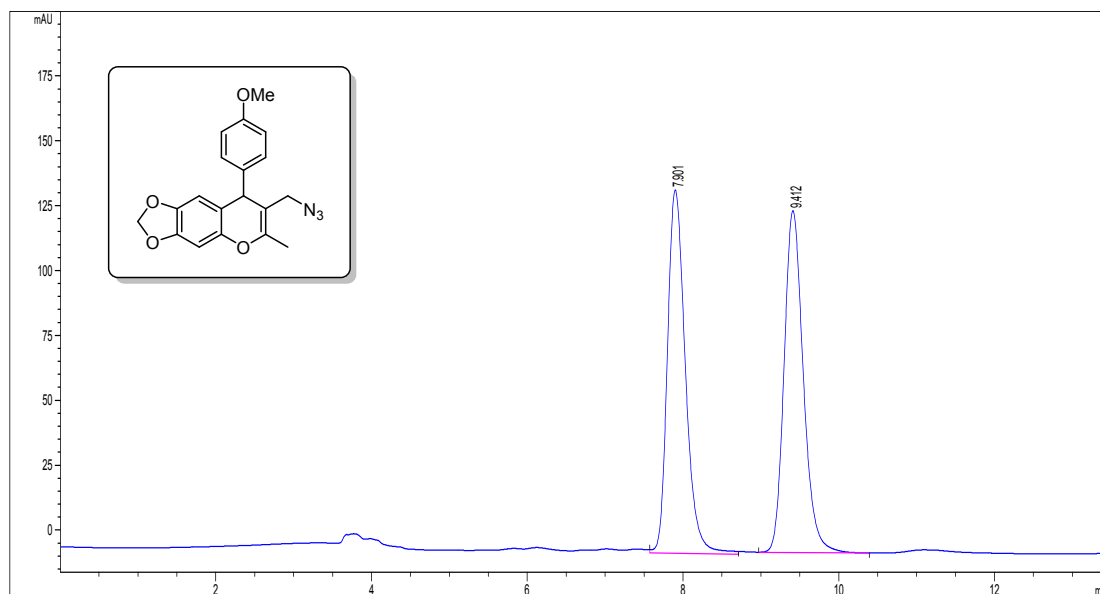

| # | Time  | Width  | Area      | Height   | Area%   |
|---|-------|--------|-----------|----------|---------|
| 1 | 7.901 | 0.2670 | 2243.2156 | 140.0278 | 49.8628 |
| 2 | 9.412 | 0.2637 | 2255.5630 | 131.7546 | 50.1372 |



Daicel Chiralcel OD-H column, n-hexane/i-PrOH = 80: 20, 1.0 mL/min, 254 nm; t (major) = 19.29 min, t (minor) = 27.36 min; 92% ee.

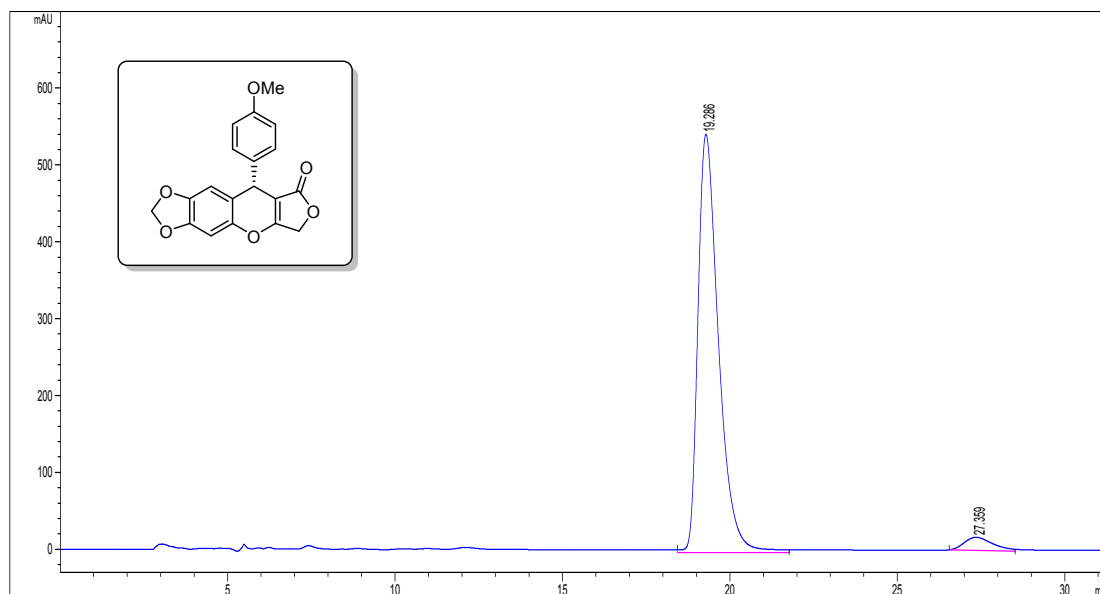

| # | Time   | Width  | Area      | Height   | Area%   |
|---|--------|--------|-----------|----------|---------|
| 1 | 19.286 | 0.7133 | 2.3299e4  | 544.3796 | 95.8441 |
| 2 | 27.359 | 0.9958 | 1010.2696 | 16.9093  | 4.1559  |

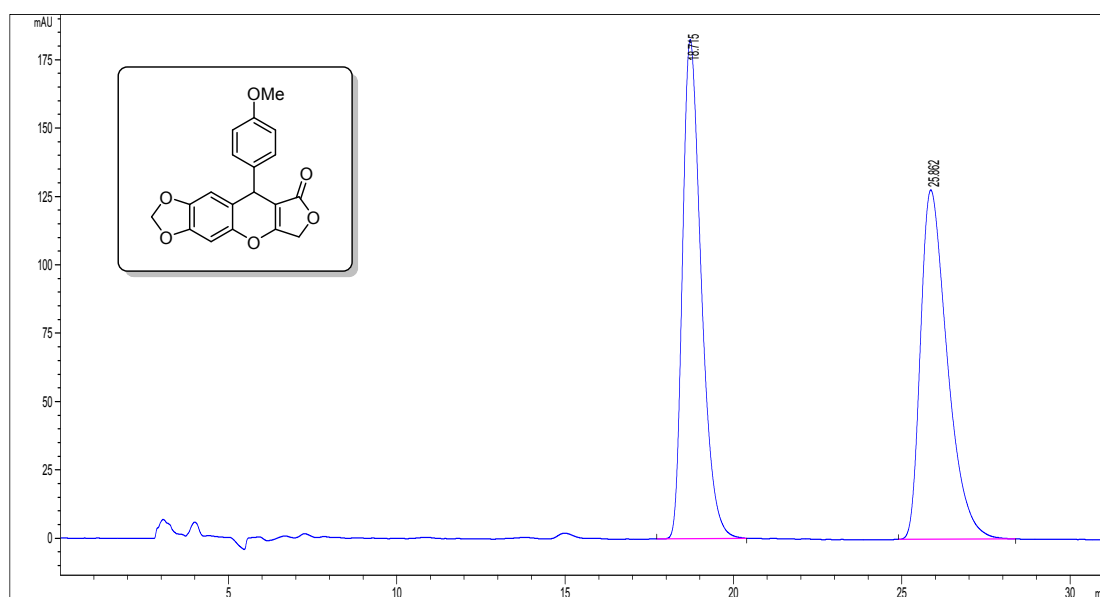

| # | Time   | Width  | Area      | Height   | Area%   |
|---|--------|--------|-----------|----------|---------|
| 1 | 18.715 | 0.5951 | 7058.4585 | 182.5420 | 49.9433 |
| 2 | 25.862 | 0.8389 | 7074.4883 | 127.7914 | 50.0567 |

### The HPLC chart for the scale-up synthesis of 3aa

Daicel Chiralcel OD-H column, *n*-hexane/*i*-PrOH = 95 : 5, 0.5 mL/min, 254 nm; t (major) = 13.27 min, t (minor) = 12.48 min; 95% ee.

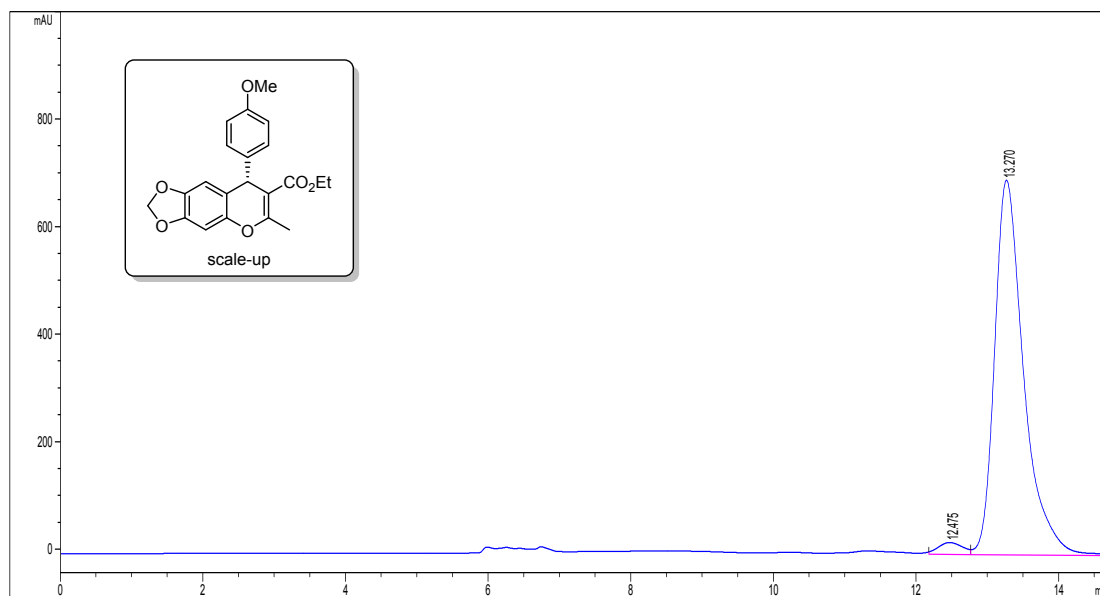

| # | Time   | Width  | Area     | Height   | Area%   |
|---|--------|--------|----------|----------|---------|
| 1 | 12.475 | 0.4010 | 534.8718 | 22.2313  | 2.6387  |
| 2 | 13.270 | 0.4719 | 1.9735e4 | 697.0076 | 97.3613 |

## 7. The structure of 3ab by X-ray diffraction analysis

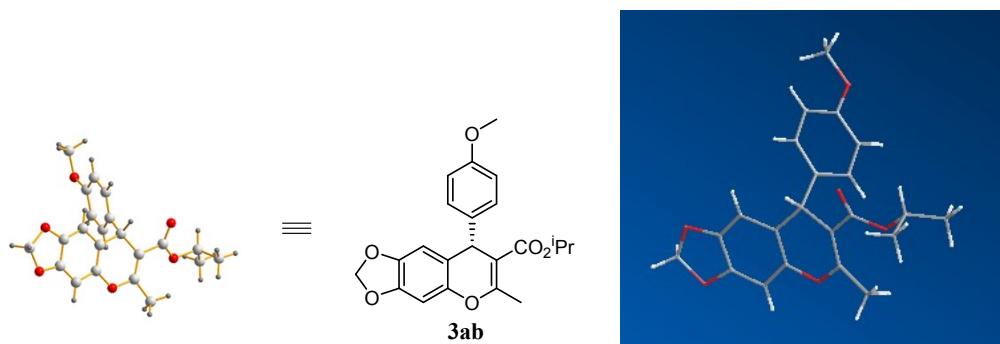

**Table 1:** Crystal data and structure refinement for (*S*)-**3ae** (CCDC 1941671)

|                                                                         |                                                   |
|-------------------------------------------------------------------------|---------------------------------------------------|
| Identification code                                                     | exp_6007                                          |
| Empirical formula                                                       | C <sub>22</sub> H <sub>22</sub> O <sub>6</sub>    |
| Formula weight                                                          | 382.39                                            |
| Temperature / K                                                         | 110.1(3)                                          |
| Crystal system                                                          | monoclinic                                        |
| Space group                                                             | P2 <sub>1</sub>                                   |
| a / Å, b / Å, c / Å                                                     | 21.7453(6), 10.7363(2), 25.2540(7)                |
| α/°, β/°, γ/°                                                           | 90, 106.562(3), 90                                |
| Volume / Å <sup>3</sup>                                                 | 5651.3(3)                                         |
| Z                                                                       | 12                                                |
| ρ <sub>calc</sub> / mg mm <sup>-3</sup>                                 | 1.348                                             |
| μ / mm <sup>-1</sup>                                                    | 0.810                                             |
| F(000)                                                                  | 2424                                              |
| Crystal size / mm <sup>3</sup>                                          | 0.350 × 0.280 × 0.080                             |
| 2θ range for data collection                                            | 7.326 to 142.55°                                  |
| Index ranges                                                            | -26 ≤ h ≤ 25, -12 ≤ k ≤ 13, -27 ≤ l ≤ 30          |
| Reflections collected                                                   | 62103                                             |
| Independent reflections                                                 | 19967[R(int) = 0.0347 (inf-0.9Å)]                 |
| Data/restraints/parameters                                              | 19967/1/1537                                      |
| Goodness-of-fit on F <sup>2</sup>                                       | 1.060                                             |
| Final R indexes [I > 2σ (I) i.e. F <sub>o</sub> > 4σ (F <sub>o</sub> )] | R <sub>1</sub> = 0.0615, wR <sub>2</sub> = 0.1652 |
| Final R indexes [all data]                                              | R <sub>1</sub> = 0.0649, wR <sub>2</sub> = 0.1688 |
| Largest diff. peak/hole / e Å <sup>-3</sup>                             | 0.588/-0.321                                      |
| Flack Parameters                                                        | 0.06(5)                                           |
| Completeness                                                            | 0.9993                                            |

## 8. References:

1. Jurd, L. *Teterhedron.*, 1977, 33, 163-168.
2. (a) Luan, Y; Schaus, S. E. *J. Am. Chem. Soc.*, 2012, 134, 19965-19968. (b) Lian, X.-L; Adili, A; Liu, B; Tao, Z.-L; Han, Z.-Y. *Org. Biomol. Chem.*, 2017, 15, 3670-3673.
